# Supplementary material for: Access to functionalized alkynylcyclopropanes via reductive radical-polar crossover-based reactions of 1,3-enynes with alkyl radicals
Source: Royal Society of Chemistry journal article supplement (doi:10.1039/d2ob02155b), 2022-12-22

# Supporting Information for

Access to functionalized alkynylcyclopropanes via reductive radical-polar  
crossover-based reactions of 1,3-enynes with alkyl radicals

Beibei Zhang, Junfei Luo and Yewen Fang

## Table of Contents

|                                                                                                           |     |
|-----------------------------------------------------------------------------------------------------------|-----|
| 1 General Information.....                                                                                | S2  |
| 1.1 Solvents, Reagents, and Starting Materials.....                                                       | S2  |
| 1.2 Instruments.....                                                                                      | S2  |
| 1.3 Picture of a Typical Reaction Setup.....                                                              | S3  |
| 2 Synthesis of 1,3-Enynes.....                                                                            | S3  |
| 2.1 General Procedure for the Preparation of Alkyl Bromide-Tethered 1,3-Enynes <b>1</b> .....             | S3  |
| 2.2 General Procedure for the Preparation of Tosylate-Tethered 1,3-Enynes <b>10</b> and <b>13</b> .....   | S5  |
| 2.3 General Procedure for the Preparation of Oximes <b>8</b> .....                                        | S6  |
| 3 General Procedure of Cyclopropanation Reactions.....                                                    | S7  |
| 3.1 General Procedure for Cyclopropanation of Alkyl Bromide-Tethered 1,3-Enynes with Alkyl Silicates..... | S7  |
| 3.2 General Procedure for the Cyclopropanation of 2-(1-Alkynyl)-2-2-Alken-1-Ones and Oximes.....          | S11 |
| 3.3 General Procedure for the Cyclopropanation Enabled by Nickel Catalysis.....                           | S15 |
| 4 Further Transformation.....                                                                             | S17 |
| 5 References.....                                                                                         | S19 |
| 6 NMR Spectra of New Compounds.....                                                                       | S20 |

# 1 General Information

## 1.1 Solvents, Reagents, and Starting Materials

All reactions were carried out under an atmosphere of nitrogen in oven-dried glassware. Photocatalysts Ir[dF(CF<sub>3</sub>)ppy]<sub>2</sub>(dtbbpy)PF<sub>6</sub><sup>[1a]</sup> and 4CzIPN<sup>[1b]</sup> were prepared according to published procedures. 1,3-Enynes were synthesized with reported procedures. Alkyl silicates and 2-(1-alkynyl)-2-2-alken-1-ones were reported in our previous literatures.<sup>[2]</sup> All redox-active NHP esters are known compounds and prepared according to the literatures.<sup>[3]</sup> Dried solvents were obtained from commercial sources and used without further purification unless otherwise noted.

## 1.2 Instruments

NMR spectra were recorded on a Bruker Avance 500 spectrometer (500 MHz) (500 MHz for <sup>1</sup>H NMR, 126 MHz for <sup>13</sup>C NMR, and 471 MHz for <sup>19</sup>F NMR). Chemical shifts were reported in ppm downfield from tetramethylsilane and calibrated using residue undeuterated solvent (Chloroform-*d* at 7.26 ppm <sup>1</sup>H NMR; 77.0 ppm <sup>13</sup>C NMR). Spectra were reported as follows: chemical shift (δ ppm), multiplicity (s = singlet, d = doublet, t = triplet, q = quartet, m = multiplet, br = broad). Coupling constants are reported in Hertz where available. High resolution mass spectra (HRMS) were recorded on Waters Premier GC-TOF MS, Waters G2-Xs QTOF MS, and JEOL-AccuTOF-GCv4G-GCT MS. Analytical thin layer chromatography was performed on Polygram SIL G/UV254 plates. Visualization was accomplished with short wave UV light, or KMnO<sub>4</sub> staining solutions. Flash column chromatography was performed using silica gel (300-400 mesh) with solvents to use.

### 1.3 Picture of a Typical Reaction Setup

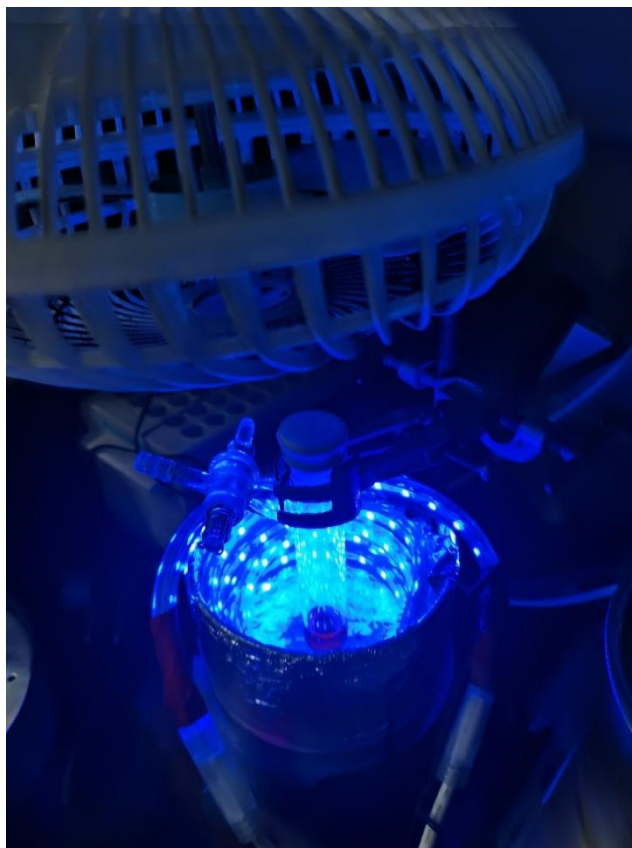

## 2 Synthesis of 1,3-Enynes

### 2.1 General Procedure for the Preparation of Alkyl Bromide-Tethered 1,3-Enynes 1

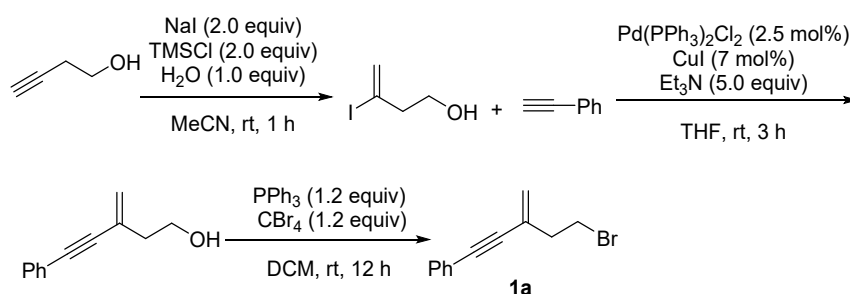

To a solution of NaI (15.0 g, 100 mmol) in MeCN (20 mL) at room temperature was added TMSCl (12.7 mL, 100 mmol) followed by H<sub>2</sub>O (0.9 mL) and the cloudy solution was stirred for 10 minutes. But-3-yn-1-ol (3.76 mL, 50 mmol) in MeCN (10

mL) was then added dropwise and the solution stirred for an additional hour. The reaction was then quenched with H<sub>2</sub>O (25 mL) and extracted with Et<sub>2</sub>O (3 x 20 mL). The organic layers were pooled and washed with 5% aqueous NaOH (20 mL), brine (20 mL), dried over MgSO<sub>4</sub>, filtered, and the solvent was removed under reduced pressure. The product was then purified by silica gel chromatography to give the 3-iodo-3-buten-1-ol.

In an oven dried round bottom flask containing a solution Pd(PPh<sub>3</sub>)<sub>2</sub>Cl<sub>2</sub> (280.8 mg, 0.4 mmol) and CuI (266.6 mg, 1.4 mmol) in THF (15 mL) at room temperature, under an argon atmosphere was added 3-iodo-3-buten-1-ol (4.0 g, 20 mmol). Et<sub>3</sub>N (13.9 mL, 100 mmol), was then added followed by phenyl acetylene (2.8 mL, 25 mmol), and the solution was stirred at room temperature for 3 h. Saturated aqueous NH<sub>4</sub>Cl (10 mL) was then added and the solution extracted with ethyl acetate (3 x 10 mL), the organic fractions pooled, and washed with brine (20 mL), dried over MgSO<sub>4</sub>, filtered, and the solvent was removed under reduced pressure. The product was then purified by silica gel chromatography to give the 3-methylene-5-phenyl-4-pentyn-1-ol.<sup>[4a]</sup>

A round-bottom flask containing 3-methylene-5-phenyl-4-pentyn-1-ol (2.1 g, 12.0 mmol) in dichloromethane (15 mL) was immersed into an ice bath. Carbon tetrabromide (4.8 g, 14.4 mmol) and triphenylphosphine (3.8 g, 14.4 mmol) were added and the resultant mixture was stirred at room temperature for 12 h. Dichloromethane was removed under reduced pressure and the residue was purified through a thin plug of silica gel column eluted with petroleum ether to give alkyl bromide-tethered **1a** as a light brown liquid.<sup>[4b]</sup>

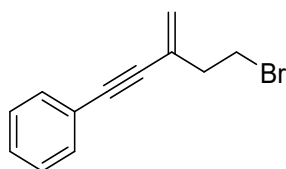

**1a**

**(5-Bromo-3-methylenepent-1-yn-1-yl)benzene (1a).** Flash column chromatography to afford product **1a** as a colorless oil. <sup>1</sup>H NMR (500 MHz, CDCl<sub>3</sub>) δ 7.46-7.44 (m, 2H), 7.34-7.32 (m, 3H), 5.56 (s, 1H), 5.41 (s, 1H), 3.63 (t, *J* = 5 Hz, 2H), 2.80 (t, *J* = 7.5 Hz, 2H); <sup>13</sup>C NMR (126 MHz, CDCl<sub>3</sub>) δ 131.6, 128.4, 128.3(2), 128.2(6), 123.7, 122.8, 90.2, 88.0, 40.4, 30.6; HRMS (ESI) [M+H]<sup>+</sup>: calculated for C<sub>12</sub>H<sub>12</sub>Br: 235.0122, found:235.0115.

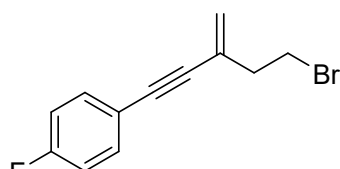

**1b**

**1-(5-Bromo-3-methylenepent-1-yn-1-yl)-4-fluorobenzene (1b).** Flash column chromatography to afford product **1b** as a colorless oil. <sup>1</sup>H NMR (500 MHz, CDCl<sub>3</sub>) δ 7.44-7.41 (m, 2H), 7.04-7.00 (m, 2H), 5.59-5.51 (m, 1H), 5.45-5.37 (m, 1H), 3.60 (t,

$J = 5$  Hz, 2H), 2.80-2.77 (m, 2H).  $^{13}\text{C}$  NMR (126 MHz,  $\text{CDCl}_3$ )  $\delta$  162.5 (d,  $J = 252$  Hz), 133.5 (d,  $J = 8.2$  Hz), 128.1, 123.8, 118.9 (d,  $J = 3.7$  Hz), 115.6 (d,  $J = 22.2$  Hz), 89.1, 87.7, 40.3, 30.5;  $^{19}\text{F}$  NMR (471 MHz,  $\text{CDCl}_3$ )  $\delta$  -110.5; HRMS (ESI)  $[\text{M}+\text{H}]^+$ : calculated for  $\text{C}_{12}\text{H}_{11}\text{BrF}$ : 253.0028, found 253.0024.

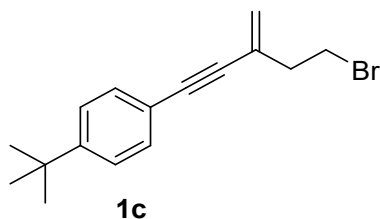

**(5-Bromo-3-methylenepent-1-yn-1-yl)-4-(tert-butyl)benzene (1c).** Flash column chromatography to afford product **1n** as a colorless oil.  $^1\text{H}$  NMR (500 MHz,  $\text{CDCl}_3$ )  $\delta$  7.39-7.33 (m, 4H), 5.54-5.53 (m, 1H), 5.39-5.38 (m, 1H), 3.61 (t,  $J = 5$  Hz, 2H), 2.81-2.77 (m, 2H), 1.31 (s, 9H);  $^{13}\text{C}$  NMR (126 MHz,  $\text{CDCl}_3$ )  $\delta$  151.8, 131.4, 128.4, 125.4, 123.3, 119.8, 90.4, 87.4, 40.5, 34.8, 31.2, 30.7; HRMS (ESI)  $[\text{M}+\text{H}]^+$ : calculated for  $\text{C}_{16}\text{H}_{20}\text{Br}$ : 291.0748, found 291.0746.

## 2.2 General Procedure for the Preparation of Tosylate-Tethered 1,3-Enynes 10 and 13.

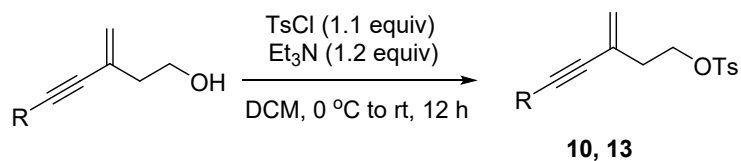

To a flask containing DCM (10 mL) was added homoallylic alcohol (2 mmol),  $\text{Et}_3\text{N}$  (0.33 mL, 2.4 mmol). The resulting mixture was cooled to 0 °C where after 4-toluenesulfonyl chloride (420 mg, 2.2 mmol) was added. The reaction mixture was then stirred at room temperature overnight. The mixture was extracted with ethyl acetate (3 x 10 mL), washed with water and brine, then dried over  $\text{MgSO}_4$  and concentrated. The residue was purified by flash chromatography to afford the product tosylate-tethered 1,3-enyne.

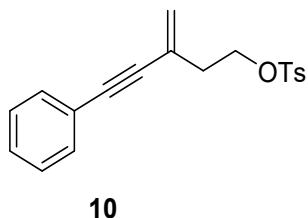

**3-Methylene-5-phenylpent-4-yn-1-yl 4-methylbenzenesulfonate (10).** Flash column chromatography to afford product **10** as a white solid.  $^1\text{H}$  NMR (500 MHz,  $\text{CDCl}_3$ )  $\delta$  7.80-7.78 (m, 2H), 7.34-7.29 (m, 4H), 7.27-7.26 (m, 3H), 5.48-5.47 (m, 1H), 5.36-5.35 (m, 1H), 4.26 (t,  $J = 5.0$  Hz, 2H), 2.60-2.57 (m, 2H), 2.35 (s, 3H);  $^{13}\text{C}$  NMR (126 MHz,  $\text{CDCl}_3$ )  $\delta$  144.7, 132.9, 131.5, 129.7, 128.4, 128.3, 127.9, 125.9, 124.3,

122.7, 90.2, 87.9, 68.1, 36.6, 21.5. These data are consistent with the published literature.<sup>[5]</sup>

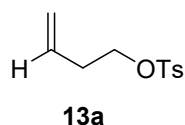

**But-3-en-1-yl 4-methylbenzenesulfonate (13a).** Flash column chromatography to afford product **13a** as a pale yellow oil. <sup>1</sup>H NMR (500 MHz, CDCl<sub>3</sub>) δ 7.80-7.78 (m, 2H), 7.34 (d, *J* = 5 Hz, 2H), 5.71-5.63 (m, 1H), 5.10-5.05 (m, 2H), 4.06 (t, *J* = 7.5 Hz, 2H), 2.45 (s, 3H), 2.42-2.38 (m, 2H); <sup>13</sup>C NMR (126 MHz, CDCl<sub>3</sub>) δ 144.7, 133.1, 132.4, 129.8, 127.9, 118.2, 69.4, 33.1, 21.6. These data are consistent with the published literature.<sup>[4b]</sup>

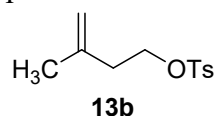

**Methylbut-3-en-1-yl 4-methylbenzenesulfonate (13b).** Flash column chromatography to afford product **13b** as a pale yellow oil. <sup>1</sup>H NMR (500 MHz, CDCl<sub>3</sub>) δ 7.80-7.78 (m, 2H), 7.34 (d, *J* = 8.0 Hz, 2H), 4.79 (s, 1H), 4.67 (s, 1H), 4.13 (t, *J* = 6.9 Hz, 2H), 2.45 (s, 3H), 2.37-2.34 (m, 2H), 1.66 (s, 3H); <sup>13</sup>C NMR (126 MHz, CDCl<sub>3</sub>) δ 144.7, 140.1, 133.1, 129.8, 127.9, 113.1, 68.5, 36.7, 22.3, 21.6. These data are consistent with the published literature.<sup>[4b]</sup>

## 2.3 General Procedure for the Preparation of Oximes 8

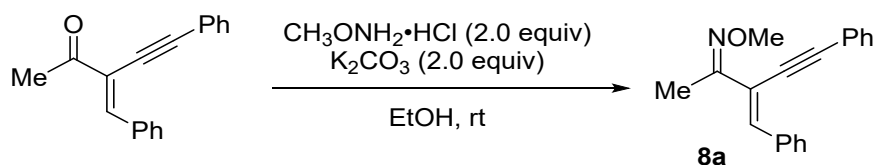

In a three necked flask, (*E*)-3-benzylidene-5-phenylpent-4-yn-2-one (492 mg, 2.0 mmol) was dissolved in 10 mL absolute ethyl alcohol under nitrogen. Potassium carbonate (552 mg, 4.0 mmol) and methoxylamine hydrochloride (334 mg, 4.0 mmol) was added to the solution. The resulting mixture was stirred for 12 h. Then the mixture was quenched by HCl (1.0 M) and the aqueous layer was extracted by ethyl acetate (3×10 mL). The combined organic layer was washed with brine (20 mL), dried by anhydrous sodium sulfate. After filtration and concentration in vacuo, the residue was purified by column chromatography on silica gel to afford the corresponding oxime product **8a**.<sup>[6]</sup>

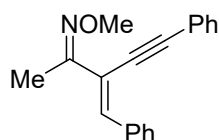

**8a**

**3-(Benzylidene)-5-phenylpent-4-yn-2-one *O*-methyl oxime (8a).** Flash column chromatography to afford product **8a** as a red brown oil.  $^1\text{H}$  NMR (500 MHz,  $\text{CDCl}_3$ )  $\delta$  7.99-7.97 (m, 2H), 7.52-7.50 (m, 2H), 7.41-7.31 (m, 6H), 7.21 (s, 1H), 4.02 (s, 3H), 2.20 (s, 3H);  $^{13}\text{C}$  NMR (126 MHz,  $\text{CDCl}_3$ )  $\delta$  155.3, 136.3, 135.9, 131.5, 129.6, 128.9, 128.5, 128.4, 128.2, 123.2, 118.6, 97.3, 86.6, 62.0, 12.6; These data are consistent with the published literature.<sup>[6]</sup>

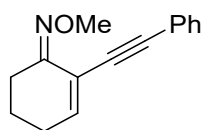

**8b**

**2-(Phenylethynyl)cyclohex-2-en-1-one *O*-methyl oxime (8b).** Flash column chromatography to afford product **8b** as a yellow oil.  $^1\text{H}$  NMR (500 MHz,  $\text{CDCl}_3$ )  $\delta$  7.51-7.49 (m, 2H), 7.31-7.29 (m, 3H), 6.69 (t,  $J = 7.5$  Hz, 1H), 3.98 (s, 3H), 2.63-2.60 (m, 2H), 2.32-2.28 (m, 2H), 1.79-1.74 (m, 2H);  $^{13}\text{C}$  NMR (126 MHz,  $\text{CDCl}_3$ )  $\delta$  153.8, 142.8, 131.7, 128.1, 128.0, 123.5, 119.3, 90.4, 85.5, 62.0, 25.7, 22.8, 20.4. These data are consistent with the published literature.<sup>[6]</sup>

## 3 General Procedure of Cyclopropanation Reactions

### 3.1 General Procedure for Cyclopropanation of Alkyl Bromide-Tethered 1,3-Enynes with Alkyl Silicates

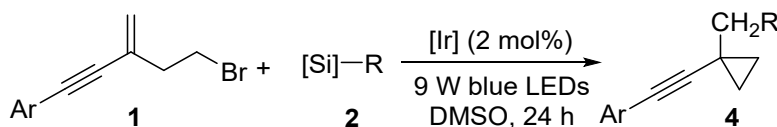

To an oven dried transparent 10 mL Schlenk tube equipped with stirring bar,  $\text{Ir}[\text{dF}(\text{CF}_3)\text{ppy}]_2(\text{dtbbpy})\text{PF}_6$  (4.5 mg, 0.004 mmol, 0.02 equiv), potassium [18-crown-6] bis(catecholato)-alkylsilicate **2** (0.40 mmol, 2.0 equiv), the aryethynyl-substituted homoallylic bromide **1** (0.2 mmol, 1.0 equiv) were added. The tube was evacuated and filled with nitrogen for 3 times. The tube was then charged with degassed DMSO (6.0 mL, 0.033 M) via a syringe. The tube was irradiated with a 9 W blue LEDs strip spiraled within a bowel for 24 h (cooling with a fan). After the

reaction was complete, the reaction solution was diluted with saturated organic layer was washed with brine, dried over  $\text{MgSO}_4$ , filtered, and solvent was evaporated to obtain crude product. Flash chromatography over silica gel afforded the product **4**.

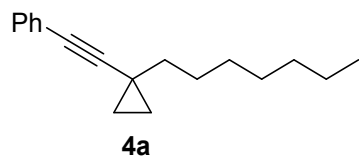

**((1-Heptylcyclopropyl)ethynyl)benzene (4a).** Flash column chromatography to afford product **4a** as a colorless oil (31.2 mg, 65% yield).  $^1\text{H}$  NMR (500 MHz,  $\text{CDCl}_3$ )  $\delta$  7.39-7.38 (m, 2H), 7.27-7.25 (m, 3H), 1.63-1.61 (m, 2H), 1.44-1.40 (m, 2H), 1.36-1.29 (m, 8H), 1.00-0.97 (m, 2H), 0.91-0.89 (m, 3H), 0.68-0.66 (m, 2H);  $^{13}\text{C}$  NMR (126 MHz,  $\text{CDCl}_3$ )  $\delta$  131.6, 128.1, 127.3, 124.1, 95.4, 76.7, 38.3, 31.9, 29.5, 29.4, 27.9, 22.7, 15.7, 14.1, 12.5; HRMS (ESI)  $[\text{M}+\text{H}]^+$ : calculated for  $\text{C}_{18}\text{H}_{25}$ : 241.1953, found 241.1956.

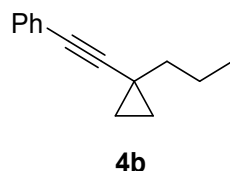

**((1-Propylcyclopropyl)ethynyl)benzene (4b).** Flash column chromatography to afford product **4b** as a colorless oil (18.4 mg, 54% yield).  $^1\text{H}$  NMR (500 MHz,  $\text{CDCl}_3$ )  $\delta$  7.38-7.36 (m, 2H), 7.28-7.24 (m, 3H), 1.67-1.63 (m, 2H), 1.41-1.37 (m, 2H), 0.99-0.96 (m, 5H), 0.68-0.65 (m, 2H);  $^{13}\text{C}$  NMR (126 MHz,  $\text{CDCl}_3$ )  $\delta$  131.6, 128.1, 127.3, 124.1, 95.3, 76.7, 40.4, 21.1, 15.6, 14.0, 12.3; HRMS (ESI)  $[\text{M}+\text{H}]^+$ : calculated for  $\text{C}_{13}\text{H}_{15}$ : 171.1174, found 171.1174.

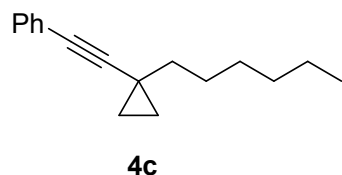

**((1-Hexylcyclopropyl)ethynyl)benzene (4c).** Flash column chromatography to afford product **4c** as a pale yellow oil (30.7 mg, 68 %yield).  $^1\text{H}$  NMR (500 MHz,  $\text{CDCl}_3$ )  $\delta$  7.39-7.37 (m, 2H), 7.28-7.24 (m, 3H), 1.65-1.58 (m, 2H), 1.38-1.26 (m, 8H), 0.99-0.97 (m, 2H), 0.91-0.88 (m, 3H), 0.67-0.65 (m, 2H);  $^{13}\text{C}$  NMR (126 MHz,  $\text{CDCl}_3$ )  $\delta$  131.6, 128.1, 127.3, 124.1, 95.3, 76.7, 38.3, 31.9, 29.1, 27.9, 22.7, 15.6, 14.1, 12.5. These data are consistent with the published literature.<sup>[7]</sup>

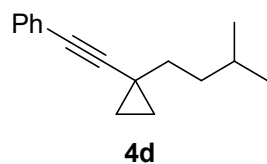

**((1-Isopentylcyclopropyl)ethynyl)benzene (4d).** Flash column chromatography to afford product **4d** as a colorless oil (22.0 mg, 52% yield).  $^1\text{H}$  NMR (500 MHz,  $\text{CDCl}_3$ )

$\delta$  7.42-7.40 (m, 2H), 7.31-7.27 (m, 3H), 1.67-1.61 (m, 1H), 1.58-1.52 (m, 2H), 1.46-1.41 (m, 2H), 1.02-1.00 (m, 2H), 0.94 (d,  $J = 10$  Hz, 6H), 0.70-0.68 (m, 2H);  $^{13}\text{C}$  NMR (126 MHz,  $\text{CDCl}_3$ )  $\delta$  131.6, 128.1, 127.3, 124.1, 95.3, 76.7, 37.0, 36.1, 27.8, 22.7, 15.6, 12.6; HRMS (ESI)  $[\text{M}+\text{H}]^+$ : calculated for  $\text{C}_{16}\text{H}_{21}$ : 213.1643, found 213.1638.

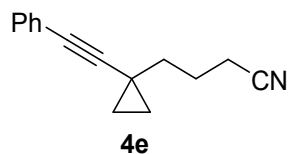

**4-(1-(Phenylethynyl)cyclopropyl)butanenitrile (4e).** Flash column chromatography to afford product **4e** as a pale yellow oil (25.1 mg, 60% yield).  $^1\text{H}$  NMR (500 MHz,  $\text{CDCl}_3$ )  $\delta$  7.37-7.35 (m, 2H), 7.28-7.26 (m, 3H), 2.50 (t,  $J = 7.5$  Hz, 2H), 2.05-1.99 (m, 2H), 1.61-1.57 (m, 2H), 1.06-1.03 (m, 2H), 0.74-0.72 (m, 2H);  $^{13}\text{C}$  NMR (126 MHz,  $\text{CDCl}_3$ )  $\delta$  131.6, 128.2, 127.7, 123.5, 119.7, 93.5, 77.7, 36.6, 24.0, 16.7, 15.6, 11.5; HRMS (ESI)  $[\text{M}+\text{H}]^+$ : calculated for  $\text{C}_{15}\text{H}_{16}\text{N}$ : 210.1283, found 210.1280.

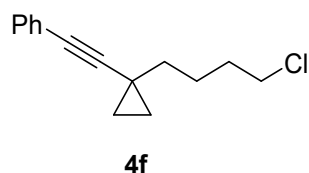

**((1-(4-Chlorobutyl)cyclopropyl)ethynyl)benzene (4f).** Flash column chromatography to afford product **4f** as a colorless oil (25.5 mg, 55% yield).  $^1\text{H}$  NMR (500 MHz,  $\text{CDCl}_3$ )  $\delta$  7.38-7.36 (m, 2H), 7.28-7.25 (m, 3H), 3.57 (t,  $J = 7.5$  Hz, 2H), 1.90-1.84 (m, 2H), 1.81-1.75 (m, 2H), 1.47-1.44 (m, 2H), 1.01-0.99 (m, 2H), 0.69-0.67 (m, 2H);  $^{13}\text{C}$  NMR (126 MHz,  $\text{CDCl}_3$ )  $\delta$  131.6, 128.2, 127.5, 123.9, 94.7, 77.3, 45.1, 37.5, 32.4, 25.4, 15.7, 12.3; HRMS (ESI)  $[\text{M}+\text{H}]^+$ : calculated for  $\text{C}_{15}\text{H}_{18}\text{Cl}$ : 223.1092, found 223.1097.

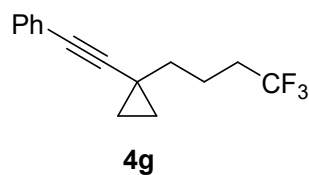

**((1-(4,4,4-Trifluorobutyl)cyclopropyl)ethynyl)benzene (4g).** Flash column chromatography to afford product **4g** as a colorless oil (35.3 mg, 70% yield).  $^1\text{H}$  NMR (500 MHz,  $\text{CDCl}_3$ )  $\delta$  7.39-7.36 (m, 2H), 7.30-7.25 (m, 3H), 2.24-2.15 (m, 2H), 1.95-1.89 (m, 2H), 1.50 (t,  $J = 7.5$  Hz, 2H), 1.04-1.02 (m, 2H), 0.70-0.68 (m, 2H);  $^{13}\text{C}$  NMR (126 MHz,  $\text{CDCl}_3$ )  $\delta$  131.6, 128.2, 127.6, 127.2 (q,  $J = 277.2$  Hz), 123.7, 93.9, 77.45, 37.0, 33.3 (q,  $J = 13.9$  Hz), 20.5 (q,  $J = 1.3$  Hz), 15.7, 12.0;  $^{19}\text{F}$  NMR (471 MHz,  $\text{CDCl}_3$ )  $\delta$  -66.3; HRMS (ESI)  $[\text{M}+\text{H}]^+$ : calculated for  $\text{C}_{15}\text{H}_{16}\text{F}_3$ : 253.1204, found 253.1196.

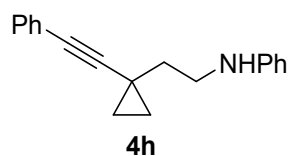

**N-(2-(1-(phenylethynyl)cyclopropyl)ethyl)aniline (4h).** Flash column chromatography to afford product **4h** as a brown oil (33.9 mg, 65% yield).  $^1\text{H}$  NMR (500 MHz,  $\text{CDCl}_3$ )  $\delta$  7.40-7.38 (m, 2H), 7.30-7.27 (m, 3H), 7.20-7.17 (m, 2H), 6.70 (t,  $J = 5$  Hz, 1H), 6.66-6.64 (m, 2H), 3.99 (br, 1H), 3.48 (t,  $J = 7.5$  Hz, 2H), 1.75 (t,  $J = 5$  Hz, 2H), 1.07-1.04 (m, 2H), 0.75-0.73 (m, 2H);  $^{13}\text{C}$  NMR (126 MHz,  $\text{CDCl}_3$ )  $\delta$  148.2, 131.6, 129.3, 128.2, 127.6, 123.6, 117.3, 112.9, 94.2, 77.6, 42.7, 37.3, 15.6, 10.6; HRMS (ESI)  $[\text{M}+\text{H}]^+$ : calculated for  $\text{C}_{19}\text{H}_{20}\text{N}$ : 262.1596, found 262.1602.

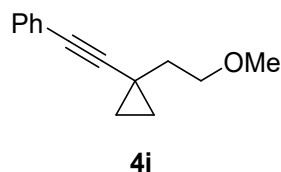

**((1-(2-Methoxyethyl)cyclopropyl)ethynyl)benzene (4i).** Flash column chromatography to afford product **4i** as a colorless oil (34.0 mg, 74% yield).  $^1\text{H}$  NMR (500 MHz,  $\text{CDCl}_3$ )  $\delta$  7.38-7.36 (m, 2H), 7.28-7.25 (m, 3H), 3.68 (t,  $J = 7.5$  Hz, 2H), 3.38 (s, 3H), 1.72 (t,  $J = 7.5$  Hz, 2H), 1.07-1.00 (m, 2H), 0.75-0.73 (m, 2H);  $^{13}\text{C}$  NMR (126 MHz,  $\text{CDCl}_3$ )  $\delta$  131.6, 131.6, 128.1, 127.5, 123.8, 94.3, 71.4, 58.8, 37.8, 15.4, 9.7; HRMS (ESI)  $[\text{M}+\text{Na}]^+$ : calculated for  $\text{C}_{14}\text{H}_{16}\text{ONa}$ : 223.1096, found 223.1099.

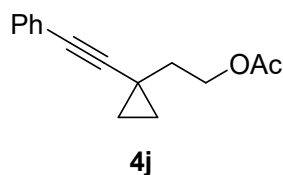

**1-(1-(Phenylethynyl)cyclopropyl)ethyl acetate (4j).** Flash column chromatography to afford product **4j** as a pale yellow oil (32.8 mg, 72% yield).  $^1\text{H}$  NMR (500 MHz,  $\text{CDCl}_3$ )  $\delta$  7.39-7.37 (m, 2H), 7.29-7.26 (m, 3H), 4.38 (t,  $J = 7.5$  Hz, 2H), 2.07 (s, 3H), 1.79 (t,  $J = 7.5$  Hz, 2H), 1.06-1.04 (m, 2H), 0.78-0.75 (m, 2H);  $^{13}\text{C}$  NMR (126 MHz,  $\text{CDCl}_3$ )  $\delta$  171.1, 131.6, 128.2, 127.6, 123.6, 93.6, 77.4, 63.3, 36.9, 21.1, 15.3, 9.7; HRMS (ESI)  $[\text{M}+\text{H}]^+$ : calculated for  $\text{C}_{15}\text{H}_{17}\text{O}_2$ : 229.1229, found 229.1210.

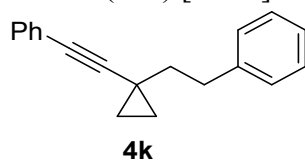

**((1-Phenethylcyclopropyl)ethynyl)benzene (4k).** Flash column chromatography to afford product **4k** as a pale yellow oil (24.6 mg, 50% yield).  $^1\text{H}$  NMR (500 MHz,  $\text{CDCl}_3$ )  $\delta$  7.33-7.30 (m, 2H), 7.21-7.14 (m, 7H), 7.11-7.08 (m, 1H), 2.88-2.85 (m, 2H), 1.66-1.62 (m, 2H), 0.91-0.89 (m, 2H), 0.55-0.53 (m, 2H);  $^{13}\text{C}$  NMR (126 MHz,  $\text{CDCl}_3$ )  $\delta$  142.2, 131.7, 128.6, 128.3, 128.2, 127.5, 125.8, 124.0, 94.7, 77.4, 40.4, 34.3, 15.7, 12.4; HRMS (ESI)  $[\text{M}+\text{H}]^+$ : calculated for  $\text{C}_{19}\text{H}_{19}$ : 247.1481, found 247.1485.

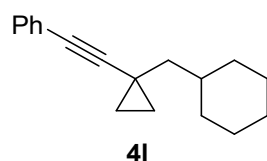

**((1-(Cyclohexylmethyl)cyclopropyl)ethynyl)benzene (4l).** Flash column chromatography to afford product **4l** as a colorless oil (37.6 mg, 79% yield).  $^1\text{H}$  NMR (500 MHz,  $\text{CDCl}_3$ )  $\delta$  7.39-7.37 (m, 2H), 7.29-7.25 (m, 3H), 1.97-1.93 (m, 2H), 1.83-1.66 (m, 4H), 1.35-1.27 (m, 4H), 1.21-1.13 (m, 1H), 1.04-0.90 (m, 4H), 0.67 (q,  $J = 5$  Hz, 2H);  $^{13}\text{C}$  NMR (126 MHz,  $\text{CDCl}_3$ )  $\delta$  131.5, 128.1, 127.2, 124.2, 95.5, 76.6, 45.5, 37.2, 33.5, 26.7, 26.4, 16.0, 10.7; HRMS (ESI)  $[\text{M}+\text{H}]^+$ : calculated for  $\text{C}_{18}\text{H}_{23}$ : 239.1800, found 239.1791.

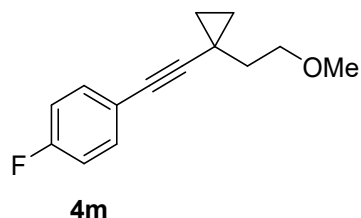

**1-Fluoro-4-((1-(2-methoxyethyl)cyclopropyl)ethynyl)benzene (4m).** Flash column chromatography to afford product **4m** as a colorless oil (29.6 mg, 68% yield).  $^1\text{H}$  NMR (500 MHz,  $\text{CDCl}_3$ )  $\delta$  7.35-7.32 (m, 2H), 6.97-6.94 (m, 2H), 3.66 (t,  $J = 7.5$  Hz, 2H), 3.38 (s, 3H), 1.71 (t,  $J = 7.5$  Hz, 2H), 1.00-0.98 (m, 2H), 0.75-0.73 (m, 2H);  $^{13}\text{C}$  NMR (126 MHz,  $\text{CDCl}_3$ )  $\delta$  162.0 (d,  $J = 248.6$  Hz), 133.3 (d,  $J = 8.2$  Hz), 119.9 (d,  $J = 3.5$  Hz), 115.3 (d,  $J = 21.9$  Hz), 93.9, 75.9, 71.4, 58.7, 37.8, 15.3, 9.6;  $^{19}\text{F}$  NMR (471 MHz,  $\text{CDCl}_3$ )  $\delta$  -112.3; HRMS (ESI)  $[\text{M}+\text{H}]^+$ : calculated for  $\text{C}_{14}\text{H}_{16}\text{FO}$ : 219.1185, found 219.1180.

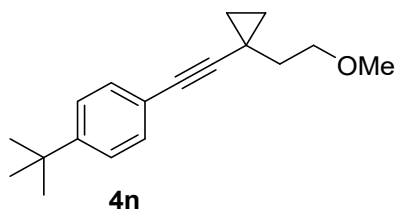

**1-(Tert-butyl)-4-((1-(2-methoxyethyl)cyclopropyl)ethynyl)benzene 4n.** Flash column chromatography to afford product **4n** as a colorless oil (30.7 mg, 60% yield).  $^1\text{H}$  NMR (500 MHz,  $\text{CDCl}_3$ )  $\delta$  7.32-7.26 (m, 4H), 3.68 (t,  $J = 7.5$  Hz, 2H), 3.38 (s, 3H), 1.72 (t,  $J = 7.5$  Hz, 2H), 1.30 (s, 9H), 1.01-0.98 (m, 2H), 0.74-0.72 (m, 2H);  $^{13}\text{C}$  NMR (126 MHz,  $\text{CDCl}_3$ )  $\delta$  150.6, 131.3, 125.1, 120.8, 93.4, 77.0, 71.5, 58.7, 37.9, 34.6, 31.2, 15.4, 9.7; HRMS (ESI)  $[\text{M}+\text{H}]^+$ : calculated for  $\text{C}_{18}\text{H}_{25}\text{O}$ : 257.1905, found 257.1901.

## 3.2 General Procedure for the Cyclopropanation of 2-(1-Alkynyl)-2-2-Alken-1-Ones and Oximes

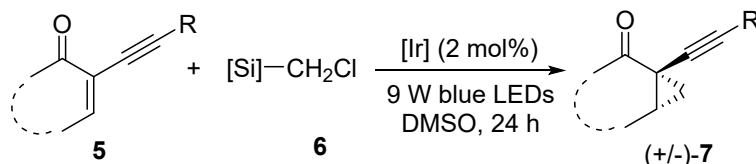

To an oven dried transparent 10 mL Schlenk tube equipped with stirring bar, Ir[dF(CF<sub>3</sub>)ppy]<sub>2</sub>(dtbbpy)PF<sub>6</sub> (4.5 mg, 0.004 mmol, 0.02 equiv), potassium [18-crown-6] bis(catecholato)chloromethylsilicate **6** (238.6 mg, 0.4 mmol, 2.0 equiv), the (5-bromo-3-methylenepent-1-yn-1-yl)benzene **5** (0.2 mmol, 1.0 equiv) were added. The tube was evacuated and filled with nitrogen for 3 times. The tube was then charged with degassed DMSO (6.0 mL, 0.033 M) via a syringe. The tube was irradiated with a 9 W blue LEDs strip spiraled within a bowel for 24 h (cooling with a fan). After the reaction was complete, the reaction solution was diluted with saturated organic layer was washed with brine, dried over MgSO<sub>4</sub>, filtered, and solvent was evaporated to obtain crude product. Flash chromatography over silica gel afforded the product (+/-)-**7**.

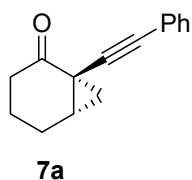

**(1R\*,6S\*)-1-(Phenylethynyl)bicyclo[4.1.0]heptan-2-one (7a).** Flash column chromatography to afford product **7a** as a pale yellow oil (31.1 mg, 74% yield). <sup>1</sup>H NMR (500 MHz, CDCl<sub>3</sub>) δ 7.44-7.41 (m, 2H), 7.28-7.25 (m, 3H), 2.43-2.37 (m, 1H), 2.22-2.17 (m, 2H), 2.12-1.99 (m, 2H), 1.81-1.75 (m, 2H), 1.71-1.62 (m, 2H); <sup>13</sup>C NMR (126 MHz, CDCl<sub>3</sub>) δ 203.8, 131.8, 128.0, 127.8, 123.1, 89.2, 79.7, 36.3, 29.4, 27.0, 21.3, 21.2, 18.2. These data are consistent with the published literature.<sup>[8]</sup>

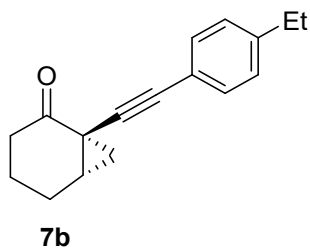

**(1R\*,6S\*)-1-((4-Ethylphenyl)ethynyl)bicyclo[4.1.0]heptan-2-one (7b).** Flash column chromatography to afford product **7b** as a pale yellow oil (35.7 mg, 75% yield). <sup>1</sup>H NMR (500 MHz, CDCl<sub>3</sub>) δ 7.34-7.33 (m, 2H), 7.10-7.08 (m, 2H), 2.61 (q, *J* = 7.5 Hz, 2H), 2.41-2.35 (m, 1H), 2.22-2.15 (m, 2H), 2.11-1.98 (m, 2H), 1.76-1.73 (m, 2H), 1.68-1.60 (m, 2H), 1.20 (t, *J* = 7.5 Hz, 3H); <sup>13</sup>C NMR (126 MHz, CDCl<sub>3</sub>) δ 203.9, 144.2, 131.8, 127.6, 120.3, 88.4, 79.8, 36.3, 29.4, 28.7, 27.0, 21.3, 21.24 18.3, 15.3; HRMS (ESI) [M+H]<sup>+</sup>: calculated for C<sub>17</sub>H<sub>19</sub>O: 239.1436, found 239.1439.

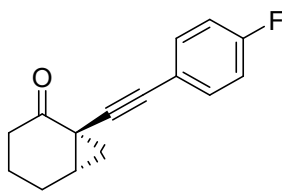

**7c**

**(1R\*,6S\*)-1-((4-Fluorophenyl)ethynyl)bicyclo[4.1.0]heptan-2-one (7c).** Flash column chromatography to afford product **7c** as a pale yellow oil (36.5 mg, 80% yield).  $^1\text{H}$  NMR (500 MHz,  $\text{CDCl}_3$ )  $\delta$  7.41-7.37 (m, 2H), 6.98-6.93 (m, 2H), 2.42-2.36 (m, 1H), 2.23-2.16 (m, 2H), 2.11-1.98 (m, 2H), 1.79-1.74 (m, 2H), 1.70-1.60 (m, 3H);  $^{13}\text{C}$  NMR (126 MHz,  $\text{CDCl}_3$ )  $\delta$  203.8, 162.2 (d,  $J = 249.2$  Hz), 133.7 (d,  $J = 8.4$  Hz), 119.2 (d,  $J = 3.5$  Hz), 115.3 (d,  $J = 21.9$  Hz), 88.8, 78.7, 36.3, 29.4, 26.9, 21.3, 21.2, 18.3;  $^{19}\text{F}$  NMR (471 MHz,  $\text{CDCl}_3$ )  $\delta$  -111.61; HRMS (ESI)  $[\text{M}+\text{H}]^+$ : calculated for  $\text{C}_{15}\text{H}_{14}\text{FO}$ : 229.1029, found 229.1029.

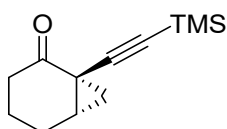

**7d**

**(1R\*,6S\*)-1-((Trimethylsilyl)ethynyl)bicyclo[4.1.0]heptan-2-one (7d).** Flash column chromatography to afford product **7d** as a colorless oil (30.5 mg, 74% yield).  $^1\text{H}$  NMR (500 MHz,  $\text{CDCl}_3$ )  $\delta$  2.35-2.30 (m, 1H), 2.17-2.10 (m, 2H), 2.07-1.93 (m, 2H), 1.75-1.71 (m, 1H), 1.66-1.63 (m, 2H), 1.54-1.51 (m, 1H), 0.15 (s, 9H);  $^{13}\text{C}$  NMR (126 MHz,  $\text{CDCl}_3$ )  $\delta$  203.4, 105.5, 84.0, 36.3, 29.4, 27.1, 21.3, 21.2, 18.2, 0.1. These data are consistent with the published literature.<sup>[8]</sup>

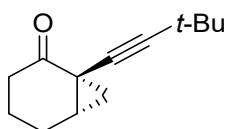

**7e**

**(1R\*,6S\*)-1-(3,3-Dimethylbut-1-yn-1-yl)bicyclo[4.1.0]heptan-2-one (7e).** Flash column chromatography to afford product **7e** as a pale yellow oil (24.7 mg, 65% yield).  $^1\text{H}$  NMR (500 MHz,  $\text{CDCl}_3$ )  $\delta$  2.33-2.28 (m, 1H), 2.15-2.08 (m, 1H), 2.05-1.89 (m, 3H), 1.73-1.67 (m, 2H), 1.63-1.56 (m, 1H), 1.42-1.39 (m, 1H), 1.19 (s, 9H);  $^{13}\text{C}$  NMR (126 MHz,  $\text{CDCl}_3$ )  $\delta$  204.5, 88.3, 78.0, 36.3, 31.2, 29.1, 27.3, 26.5, 21.2, 21.1, 18.3; HRMS (ESI)  $[\text{M}+\text{H}]^+$ : calculated for  $\text{C}_{13}\text{H}_{19}\text{O}$ : 191.1436, found 191.1428.

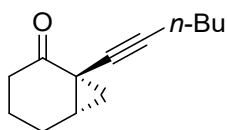

**7f**

**(1*R*\*,6*S*\*)-1-(Hex-1-yn-1-yl)bicyclo[4.1.0]heptan-2-one (7f).** Flash column chromatography to afford product **7f** as a pale yellow oil (27.8 mg, 73% yield). <sup>1</sup>H NMR (500 MHz, CDCl<sub>3</sub>) δ 2.35-2.30 (m, 1H), 2.19 (t, *J* = 7.5 Hz, 2H), 2.17-2.09 (m, 1H), 2.06-1.90 (m, 3H), 1.74-1.67 (m, 1H), 1.65-1.56 (m, 2H), 1.49-1.42 (m, 3H), 1.41-1.32 (m, 2H), 0.88 (t, *J* = 7.5 Hz, 3H); <sup>13</sup>C NMR (126 MHz, CDCl<sub>3</sub>) δ 204.9, 80.3, 79.4, 36.2, 31.0, 29.1, 26.8, 22.0, 21.2, 21.0, 18.6, 18.4, 13.7. These data are consistent with the published literature.<sup>[8]</sup>

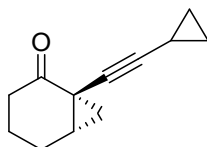

**7g**

**(1*R*\*,6*S*\*)-1-(Cyclopropylethynyl)bicyclo[4.1.0]heptan-2-one (7g).** Flash column chromatography to afford product **7g** as a pale yellow oil (27.8 mg, 72% yield). <sup>1</sup>H NMR (500 MHz, CDCl<sub>3</sub>) δ 2.34-2.28 (m, 1H), 2.15-2.08 (m, 1H), 2.02-1.90 (m, 2H), 1.73-1.68 (m, 1H), 1.63-1.55 (m, 2H), 1.43-1.41 (m, 1H), 1.26-1.21 (m, 1H), 0.72-0.67 (m, 2H), 0.66-0.62 (m, 2H); <sup>13</sup>C NMR (126 MHz, CDCl<sub>3</sub>) δ 204.7, 83.2, 74.8, 36.2, 29.0, 26.6, 21.2, 20.9, 18.3, 8.3, 8.2. These data are consistent with the published literature.<sup>[8]</sup>

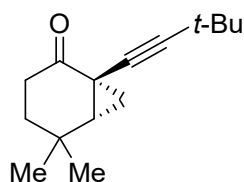

**7h**

**(1*R*\*,6*R*\*)-1-(3,3-Dimethylbut-1-yn-1-yl)-5,5-dimethylbicyclo[4.1.0]heptan-2-one (7h).** Flash column chromatography to afford product **7h** as a colorless oil (33.5 mg, 77% yield). <sup>1</sup>H NMR (500 MHz, CDCl<sub>3</sub>) δ 2.26-2.23 (m, 2H), 1.78-1.74 (m, 1H), 1.62-1.59 (m, 1H), 1.52-1.45 (m, 1H), 1.40-1.36 (m, 2H), 1.19 (s, 9H), 1.16 (s, 3H), 1.09 (s, 3H); <sup>13</sup>C NMR (126 MHz, CDCl<sub>3</sub>) δ 204.6, 88.5, 77.8, 41.3, 32.8, 31.2, 31.0, 29.6, 29.2, 27.4, 27.3, 26.9, 21.2; HRMS (ESI) [M+H]<sup>+</sup>: calculated for C<sub>15</sub>H<sub>23</sub>O: 219.1749, found 219.1752.

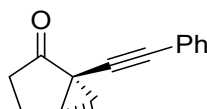

**7i**

**(1*R*\*,5*S*\*)-1-(Phenylethynyl)bicyclo[3.1.0]hexan-2-one (7i).** Flash column chromatography to afford product **7i** as a pale yellow oil (20.8 mg, 53% yield). <sup>1</sup>H NMR (500 MHz, CDCl<sub>3</sub>) δ 7.44-7.42 (m, 2H), 7.29-7.26 (m, 3H), 2.57-2.53 (m, 1H), 2.29-2.23 (m, 1H), 2.22-2.19 (m, 2H), 2.05-2.00 (m, 1H), 1.75-1.72 (m, 1H), 1.52-1.50 (m, 1H); <sup>13</sup>C NMR (126 MHz, CDCl<sub>3</sub>) δ 209.4, 131.9, 128.1, 128.1, 123.0, 85.3,

82.0, 32.4, 31.4, 29.0, 23.7, 21.6; HRMS (ESI)  $[M+H]^+$ : calculated for  $C_{14}H_{13}O$ : 197.0966, found 197.0970.

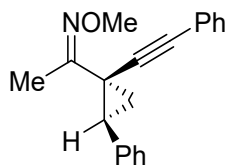

**9a**

**1-(2-Phenyl-1-(phenylethynyl)cyclopropyl)ethan-1-one *O*-methyl oxime (9a).**

Flash column chromatography to afford product **9a** as a pale yellow oil (46.2 mg, 80% yield).  $^1H$  NMR (500 MHz,  $CDCl_3$ )  $\delta$  7.37-7.32 (m, 4H), 7.29-7.26 (m, 1H), 7.22-7.17 (m, 3H), 7.11-7.08 (m, 2H), 3.88 (s, 3H), 2.71-2.67 (m, 1H), 2.18-2.15 (m, 1H), 2.14 (s, 3H), 1.69-1.67 (m, 1H);  $^{13}C$  NMR (126 MHz,  $CDCl_3$ )  $\delta$  155.9, 137.2, 131.4, 128.5, 128.0, 127.8, 127.6, 126.6, 123.3, 88.6, 82.2, 61.6, 34.3, 26.5, 20.9, 13.9. These data are consistent with the published literature.<sup>[8]</sup>

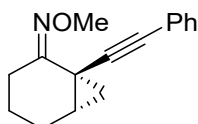

**9b**

**(1*R*\*,6*S*\*)-1-(Phenylethynyl)bicyclo[4.1.0]heptan-2-one *O*-methyl oxime (9b).**

Flash column chromatography to afford product **9b** as a pale yellow oil (40.6 mg, 85% yield).  $^1H$  NMR (500 MHz,  $CDCl_3$ )  $\delta$  7.44-7.42 (m, 2H), 7.28-7.25 (m, 3H), 3.92 (s, 3H), 2.64-2.59 (m, 1H), 2.15-2.08 (m, 1H), 1.95-1.89 (m, 3H), 1.62-1.58 (m, 1H), 1.46-1.43 (m, 1H), 1.34-1.26 (m, 2H);  $^{13}C$  NMR (126 MHz,  $CDCl_3$ )  $\delta$  156.6, 131.8, 128.0, 127.5, 123.8, 92.3, 77.9, 61.6, 25.5, 22.1, 21.3, 19.3, 16.4, 16.1. These data are consistent with the published literature.<sup>[8]</sup>

### 3.3 General Procedure for the Cyclopropanation Enabled by Nickel Catalysis

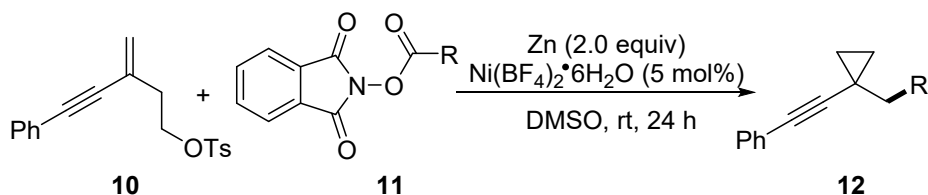

To an oven-dried Schlenk tube was charged with 3-methylene-5-phenylpent-4-yn-1-yl 4-methylbenzenesulfonate **10** (64 mg, 0.2 mmol), NHP ester **11** (0.5 mmol, 2.5 equiv),  $Ni(BF_4)_2 \cdot 6H_2O$  (3.4 mg, 5 mol%), Zn (26 mg, 0.4 mmol, 2.0 equiv) in DMSO (4 mL). The tube was capped with a rubber septum, evacuated and back-filled with nitrogen three times. The reaction mixture was allowed to stir at room temperature for 24 h, 3 mL of  $H_2O$  and 3 mL saturate  $NH_4Cl$  solution was added to quench the reaction and

the mixture was extracted by ethyl acetate. The combined organic layer was dried over  $\text{MgSO}_4$ . After filtration and concentration, the residue was purified by column chromatography on silica gel to give product **12**.

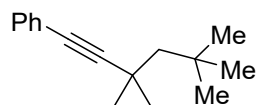

**12a**

**((1-Neopentylcyclopropyl)ethynyl)benzene (12a).** Flash column chromatography to afford product **12a** as a pale yellow oil (33.1 mg, 78% yield).  $^1\text{H}$  NMR (500 MHz,  $\text{CDCl}_3$ )  $\delta$  7.37-7.35 (m, 2H), 7.29-7.25 (m, 3H), 1.41 (s, 2H), 1.12 (s, 9H), 1.04-1.01 (m, 2H), 0.74-0.72 (m, 2H);  $^{13}\text{C}$  NMR (126 MHz,  $\text{CDCl}_3$ )  $\delta$  131.2, 128.1, 127.2, 124.3, 96.9, 76.4, 51.1, 32.7, 30.4, 16.9, 9.7; HRMS (ESI)  $[\text{M}+\text{H}]^+$ : calculated for  $\text{C}_{16}\text{H}_{21}$ : 213.1643, found 213.1637.

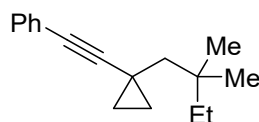

**12b**

**((1-(2,2-Dimethylbutyl)cyclopropyl)ethynyl)benzene (12b).** Flash column chromatography to afford product **12b** as a pale yellow oil (31.2 mg, 69% yield).  $^1\text{H}$  NMR (500 MHz,  $\text{CDCl}_3$ )  $\delta$  7.37-7.35 (m, 2H), 7.29-7.25 (m, 3H), 1.47 (q,  $J = 7.5$  Hz, 2H), 1.40 (s, 2H), 1.07 (s, 6H), 1.02 (q,  $J = 5$  Hz, 2H), 0.89 (t,  $J = 7.5$  Hz, 3H), 0.74-0.72 (m, 2H);  $^{13}\text{C}$  NMR (126 MHz,  $\text{CDCl}_3$ )  $\delta$  131.2, 128.1, 127.2, 124.3, 97.0, 76.2, 48.6, 35.1, 35.1, 27.3, 17.1, 9.4, 8.5; HRMS (ESI)  $[\text{M}+\text{H}]^+$ : calculated for  $\text{C}_{17}\text{H}_{23}$ : 227.1800, found 227.1794.

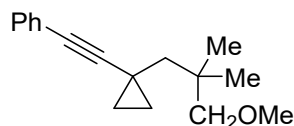

**12c**

**((1-(3-Methoxy-2,2-dimethylpropyl)cyclopropyl)ethynyl)benzene (12c).** Flash column chromatography to afford product **12c** as a pale yellow oil (31.9 mg, 70% yield).  $^1\text{H}$  NMR (500 MHz,  $\text{CDCl}_3$ )  $\delta$  7.37-7.35 (m, 2H), 7.29-7.25 (m, 3H), 3.35 (s, 3H), 3.27 (s, 2H), 1.48 (s, 2H), 1.12 (s, 6H), 1.01 (q,  $J = 5$  Hz, 2H), 0.76 (q,  $J = 5$  Hz, 2H);  $^{13}\text{C}$  NMR (126 MHz,  $\text{CDCl}_3$ )  $\delta$  131.3, 128.1, 127.2, 124.3, 97.0, 81.7, 76.2, 59.0, 46.0, 36.5, 25.5, 16.9, 9.1; HRMS (ESI)  $[\text{M}+\text{Na}]^+$ : calculated for  $\text{C}_{16}\text{H}_{20}\text{ONa}$ : 251.1412, found 251.1409.

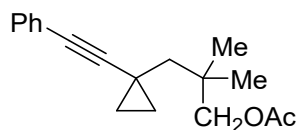

**12d**

**2,2-Dimethyl-3-(1-(phenylethynyl)cyclopropyl)propyl acetate (12d).** Flash column chromatography to afford product **12d** as a pale yellow oil (28.1 mg, 52% yield).  $^1\text{H}$  NMR (500 MHz,  $\text{CDCl}_3$ )  $\delta$  7.35-7.33 (m, 2H), 7.28-7.23 (m, 3H), 4.03 (s, 2H), 2.06 (s, 3H), 1.13 (s, 6H), 1.03 (q,  $J = 5$  Hz, 2H), 0.72 (q,  $J = 5$  Hz, 2H);  $^{13}\text{C}$  NMR (126 MHz,  $\text{CDCl}_3$ )  $\delta$  171.2, 131.3, 128.1, 127.4, 123.9, 96.0, 76.6, 72.4, 46.2, 35.7, 25.2, 21.0, 16.9, 9.0; HRMS (ESI)  $[\text{M}+\text{Na}]^+$ : calculated for  $\text{C}_{18}\text{H}_{22}\text{O}_2\text{Na}$ : 293.1517, found 293.1514.

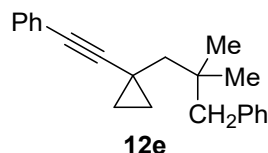

**(2,2-Dimethyl-3-(1-(phenylethynyl)cyclopropyl)propyl)benzene (12e).** Flash column chromatography to afford product **12e** as a pale yellow oil (31.8 mg, 58% yield).  $^1\text{H}$  NMR (500 MHz,  $\text{CDCl}_3$ )  $\delta$  7.36-7.34 (m, 2H), 7.29-7.20 (m, 8H), 2.76 (s, 2H), 1.44 (s, 2H), 1.09 (s, 6H), 1.05-1.03 (m, 2H), 0.73-0.71 (m, 2H);  $^{13}\text{C}$  NMR (126 MHz,  $\text{CDCl}_3$ )  $\delta$  139.4, 131.2, 130.9, 128.2, 127.6, 127.3, 125.7, 124.2, 96.9, 76.8, 49.2, 49.1, 36.3, 27.5, 17.3, 9.4; HRMS (ESI)  $[\text{M}+\text{Na}]^+$ : calculated for  $\text{C}_{21}\text{H}_{22}\text{Na}$ : 297.1619, found 297.1625.

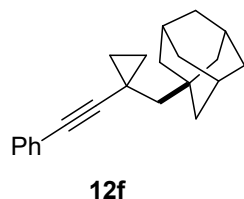

**1-((1-(Phenylethynyl)cyclopropyl)methyl)adamantane (12f).** Flash column chromatography to afford product **12f** as a pale yellow oil (29 mg, 55% yield).  $^1\text{H}$  NMR (500 MHz,  $\text{CDCl}_3$ )  $\delta$  7.35-7.33 (m, 2H), 7.28-7.23 (m, 3H), 1.98-1.96 (m, 3H), 1.77 (d,  $J = 3$  Hz, 6H), 1.73-1.69 (m, 6H), 1.26 (s, 2H), 0.98 (q,  $J = 5$  Hz, 2H), 0.70-0.68 (m, 2H);  $^{13}\text{C}$  NMR (126 MHz,  $\text{CDCl}_3$ )  $\delta$  131.2, 128.1, 127.2, 124.4, 97.4, 76.2, 52.3, 43.2, 37.2, 34.7, 28.8, 16.9, 8.5; HRMS (ESI)  $[\text{M}+\text{H}]^+$ : calculated for  $\text{C}_{22}\text{H}_{27}$ : 291.2113, found 291.2115.

## 4 Further Transformation

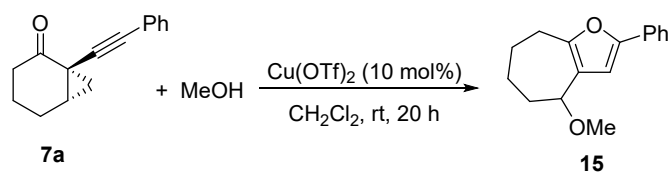

To an oven dried transparent 10 mL Schlenk tube equipped with stirring bar,  $\text{Cu(OTf)}_2$  (7.5 mg, 10 mol%), to a solution of the (1*R*\*, 6*S*\*)-1-(phenylethynyl)bicyclo[4.1.0]heptan-2-one (42.2 mg, 0.2 mmol) in dry  $\text{CH}_2\text{Cl}_2$  (5 mL) was added sodium MeOH (40  $\mu\text{L}$ , 0.4 mmol, 2.0 equiv) was added. The resulting mixture was stirred for 20 h. After concentration in vacuo, the residue was purified by column chromatography on silica gel to afford the furan product **15**.<sup>[8]</sup>

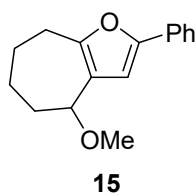

**5-Methoxy-2-phenyl-5,6,7,8-tetrahydro-4H-cyclohepta[b]furan (15).** Flash column chromatography to afford product **15** as pale yellow oil (41.4 mg, 85% yield).  $^1\text{H}$  NMR (500 MHz,  $\text{CDCl}_3$ )  $\delta$  7.61-7.59 (m, 2H), 7.36-7.33(m, 2H), 7.22-7.19 (m, 1H), 6.46 (s, 1H), 3.40 (s, 3H), 3.36-3.31 (m, 1H), 2.90-2.85 (m, 2H), 2.78-2.71 (m, 1H), 2.62-2.57 (m, 1H), 2.23-2.18 (m, 1H), 2.01-1.96 (m, 1H), 1.78-1.58 (m, 2H);  $^{13}\text{C}$  NMR (126 MHz,  $\text{CDCl}_3$ )  $\delta$  153.1, 150.2, 131.0, 128.5, 126.6, 123.1, 116.6, 108.9, 79.7, 56.1, 35.7, 31.1, 28.3, 22.7. These data are consistent with the published literature.<sup>[8]</sup>

## 5 References

1. (a) M. S. Oderinde and J. W. Johannes, Practical Syntheses of [2,2'-bipyridine]bis[3,5-difluoro-2-[5-(trifluoromethyl)-2-pyridinyl]phenyl]Iridium(III) hexafluorophosphate,  $[\text{Ir}\{\text{dF}(\text{CF}_3)\text{ppy}\}_2(\text{bpy})]\text{PF}_6$  and [4,4'-bis(tert-butyl)-2,2'-bipyridine]bis[3,5-difluoro-2-[5-(trifluoromethyl)-2-pyridinyl]phenyl]Iridium(III) hexafluorophosphate,  $[\text{Ir}\{\text{dF}(\text{CF}_3)\text{ppy}\}_2(\text{dtbbpy})]\text{PF}_6$ , *Org. Synth.*, 2017, **94**, 77-92; (b) J. Luo and J. Zhang, Donor-Acceptor Fluorophores for Visible-Light-Promoted Organic Synthesis: Photoredox/Ni Dual Catalytic  $\text{C}(\text{sp}^3)\text{-C}(\text{sp}^2)$  Cross-Coupling, *ACS Catal.*, 2016, **6**, 873-877;
2. (a) T. Guo, L. Zhang, X. Liu, Y. Fang, X. Jin, Y. Yang, Y. Li, B. Chen and M. Ouyang, Visible-Light-Promoted Redox-Neutral Cyclopropanation Reactions of  $\alpha$ -Substituted Vinylphosphonates and Other Michael Acceptors with Chloromethyl Silicate as Methylene Transfer Reagent, *Adv. Synth. Catal.*, 2018, **360**, 4459-4463; (b) W. Luo, Y. Yang, Y. Fang, X. Zhang, X. Jin, G. Zhao, L. Zhang, Y. Li, W. Zhou, T. Xia and B. Chen, Photoredox-Catalyzed Cyclopropanation of 1,1-Disubstituted Alkenes via Radical-Polar Crossover Process, *Adv. Synth. Catal.*, 2019, **361**, 4215-4221; (c) W. Luo, Y. Fang, L. Zhang, T. Xu, Y. Liu, Y. Li, X. Jin, J. Bao, X. Wu and Z. Zhang, Bromomethyl Silicate: A Robust Methylene Transfer Reagent for Radical-Polar Crossover Cyclopropanation of Alkenes, *Eur. J. Org. Chem.*, 2020, 1778-1781; (d) Y. Liu, W. Lou, T. Xia, Y. Fang, C. Du, X. Jin, Y. Li, L. Zhang, W. Lei, H. Wu, Merging radical-polar crossover/cycloisomerization processes: access to polyfunctional furans enabled by metallaphotoredox catalysis, *Org. Chem. Front.*, 2021, **8**, 1732-1738.
3. (a) C. Zheng, Y. Wang, Y. Xu, Z. Chen, G. Chen, and S. Liang, Ru-Photoredox-Catalyzed Decarboxylative Oxygenation of Aliphatic Carboxylic Acids through *N*-(acyloxy)phthalimide, *Org. Lett.*, 2018, **20**, 4824-4827; (b) K. N. Tripathi, S. Singh, N. Akhtar, K. Manna and R. P. Singh, Visible-light-driven site-selective alkylation of the benzo core of coumarins, *Chem. Commun.* 2022, **58**, 9674-9677; (c) H.-M. Huang, M. Koy, E. Serrano, P. M. Pflüger, J. L. Schwarz and F. Glorius, Catalytic radical generation of  $\pi$ -allylpalladium complexes, *Nat. Catal.*, 2020, **3**, 393-400; (d) P. S. Baran, C. Li, J. Wang, A. K. Chatterjee, M. Kumar, S. Yu, K. A. Johnson, T. Qin and M. Shang, Cu- and Ni-catalyzed decarboxylative borylation reactions, WO2018175173A1.
4. (a) J. L. Brooks and A. J. Frontier, Cyclization Cascades Initiated by 1,6-Conjugate Addition, *J. Am. Chem. Soc.*, 2012, **134**, 16551-16553; (b) J. Y. See, H. Yang, Y. Zhao, M. W. Wong, Z. Ke and Y.-Y. Yeung, Desymmetrizing Enantio- and Diastereoselective Selenoetherification through Supramolecular Catalysis, *ACS Catal.*, 2018, **8**, 850-858.
5. J.-F. Chen, and C. Li, Cobalt-Catalyzed gem-Cross-Dimerization of Terminal Alkynes, *ACS Catal.*, 2020, **10**, 3881-3889.
6. M. Zhang and J. Zhang, Gold(I)-Catalyzed Cyclization of 2-(1-Alkynyl)-alk-2-en-1-one Oximes: A Facile Access to Highly Substituted *N*-Alkoxyprolines,

- Chem. Commun.*, 2012, **48**, 6399–6401.
7. D. J. Tindall, H. Krause and A. Fürstner, Iron-Catalyzed Cross-Coupling of 1-Alkynylcyclopropyl Tosylates and Related Substrates, *Adv. Synth. Catal.*, 2016, **358**, 2398-2403.
  8. J. Zhang and H.-G. Schmalz, Gold(I)-catalyzed reaction of 1-(1-alkynyl)cyclopropyl ketones with nucleophiles: a modular entry to highly substituted furans, *Angew. Chem. Int. Ed.*, 2006, **45**, 6704-6707.

## 6 NMR Spectra of New Compounds

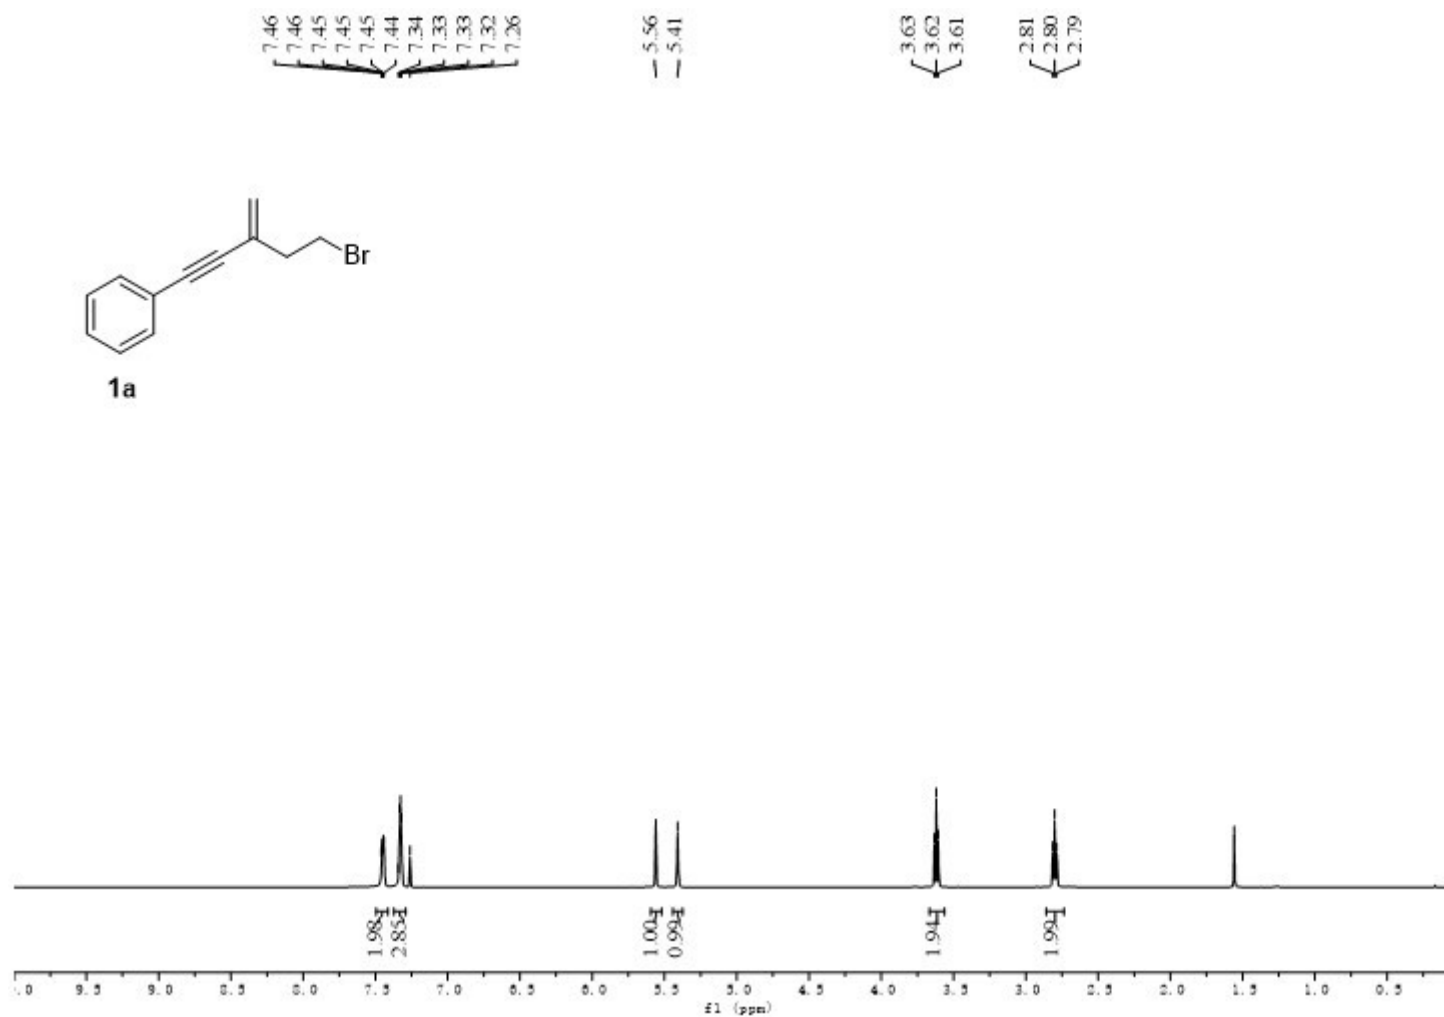

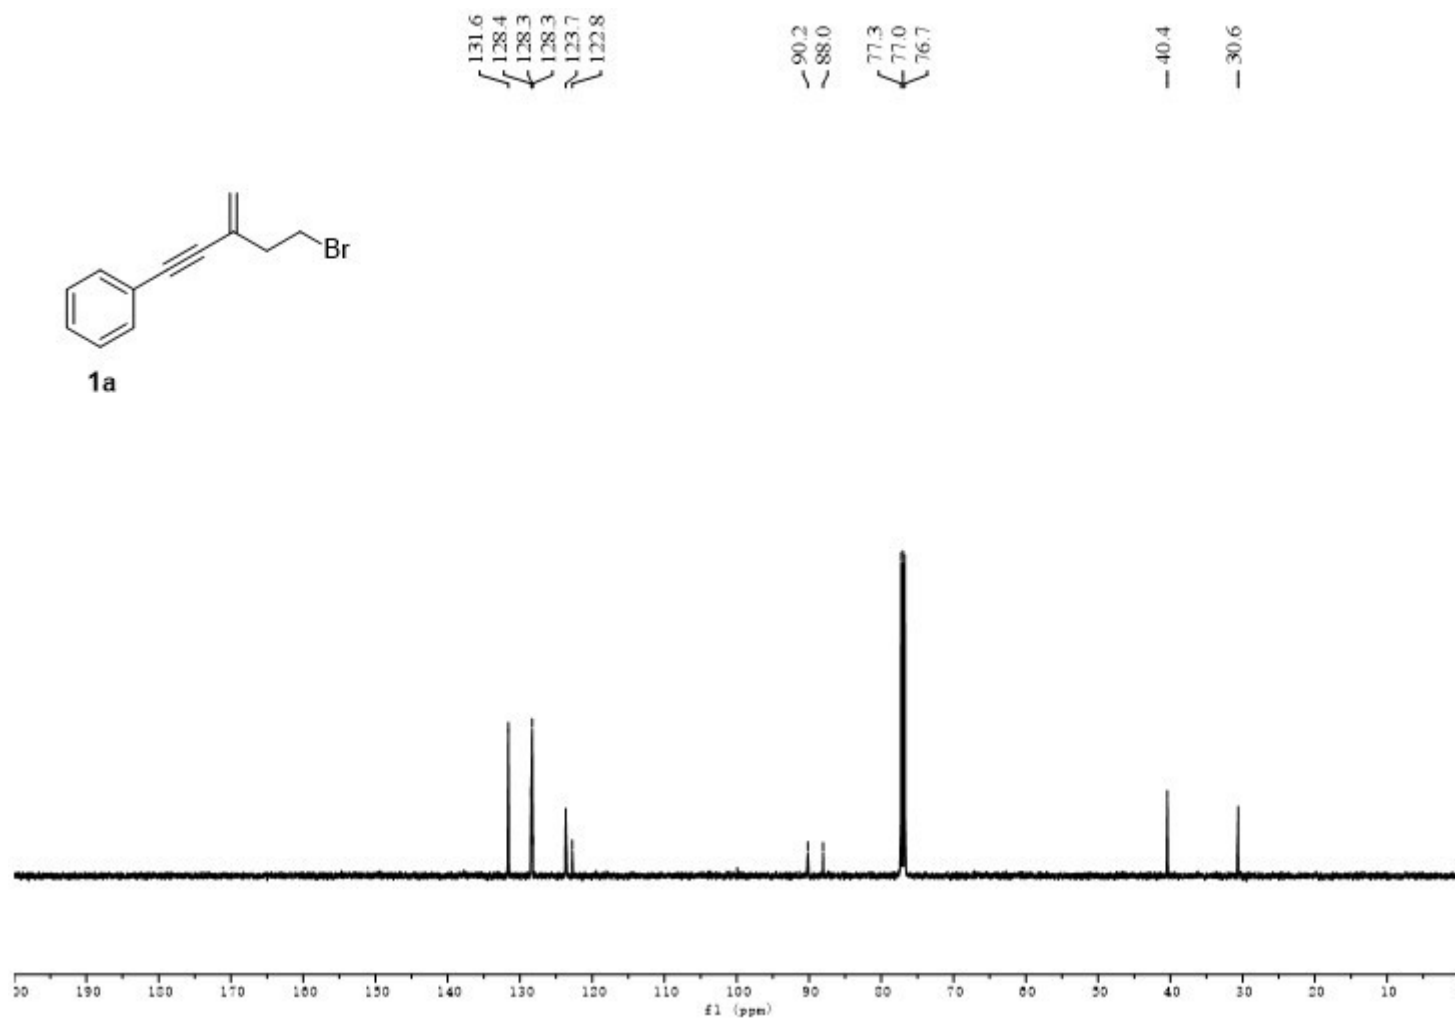

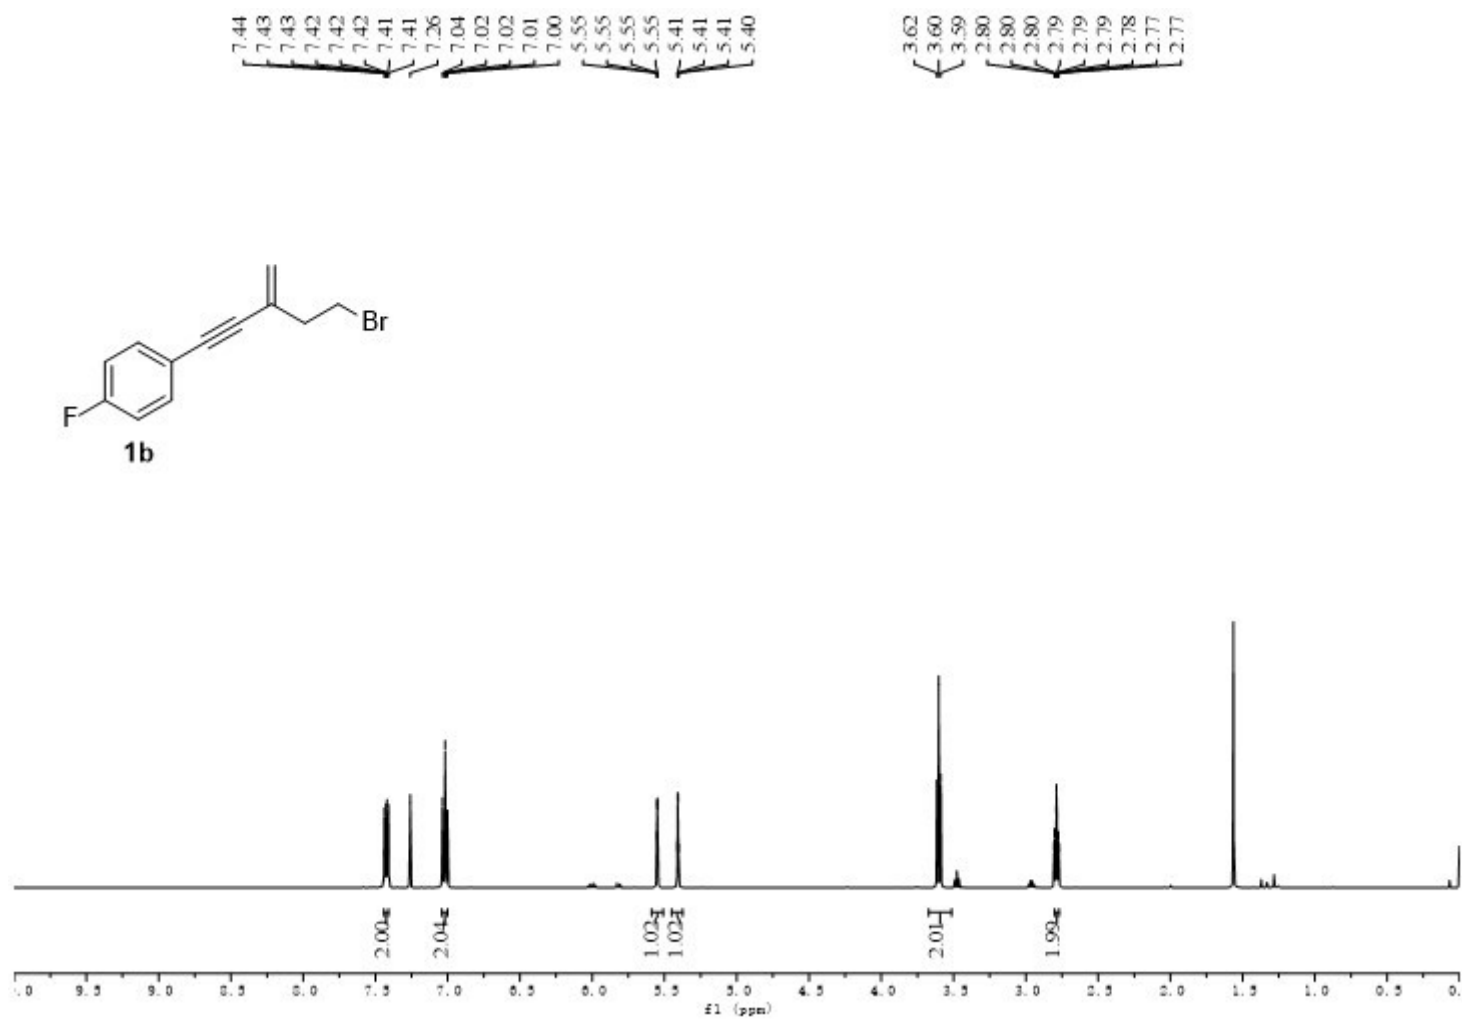

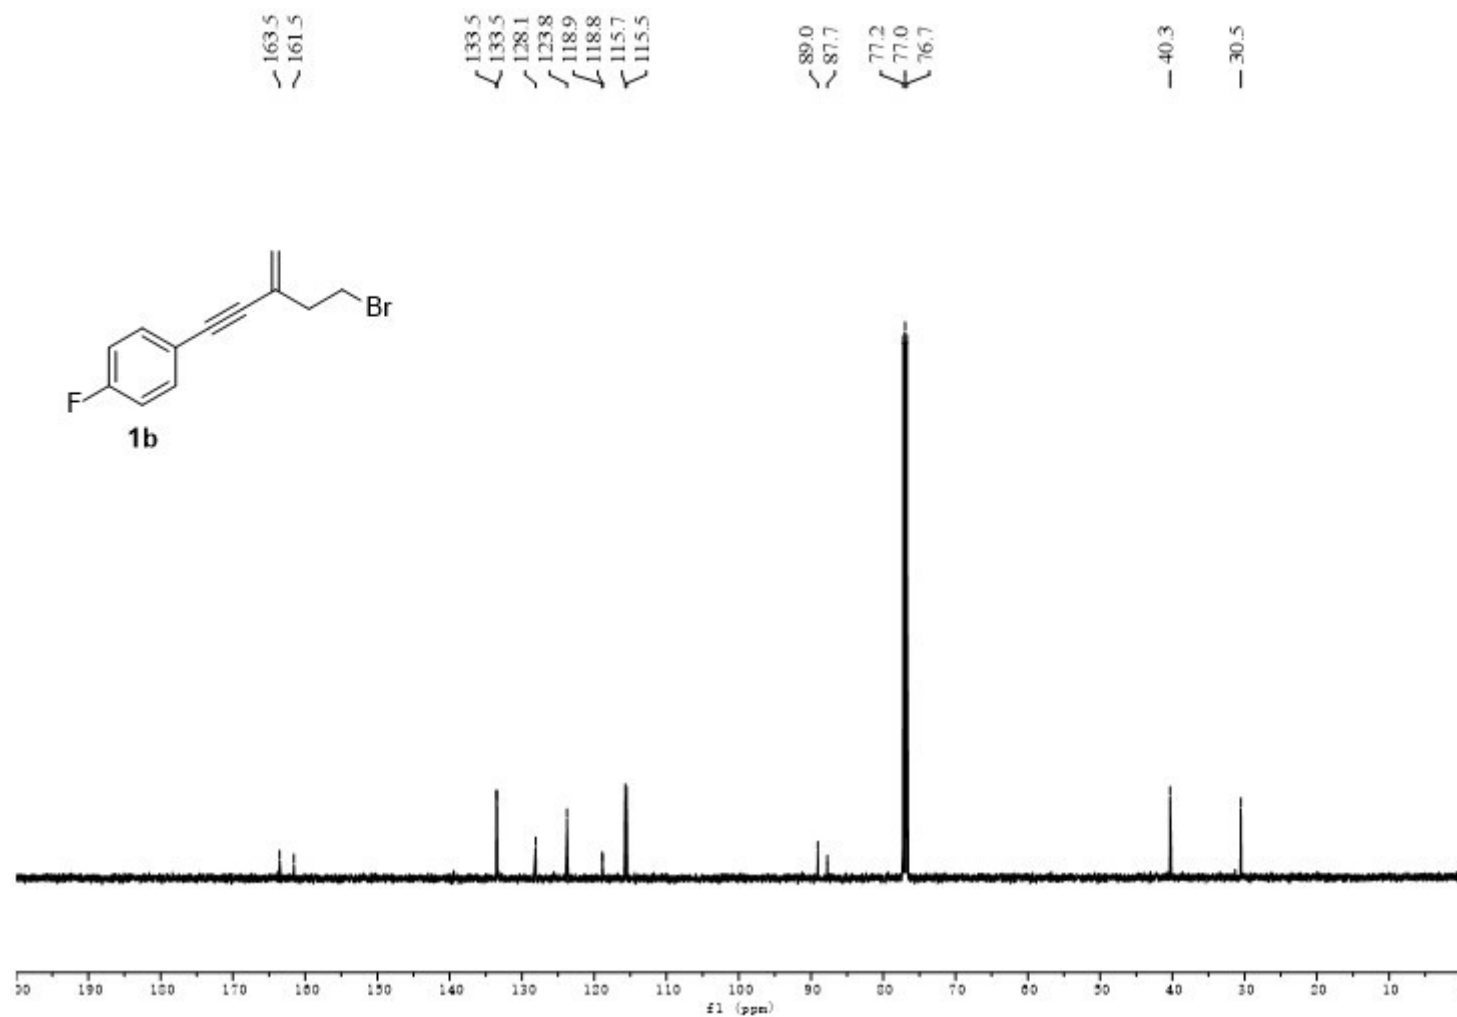

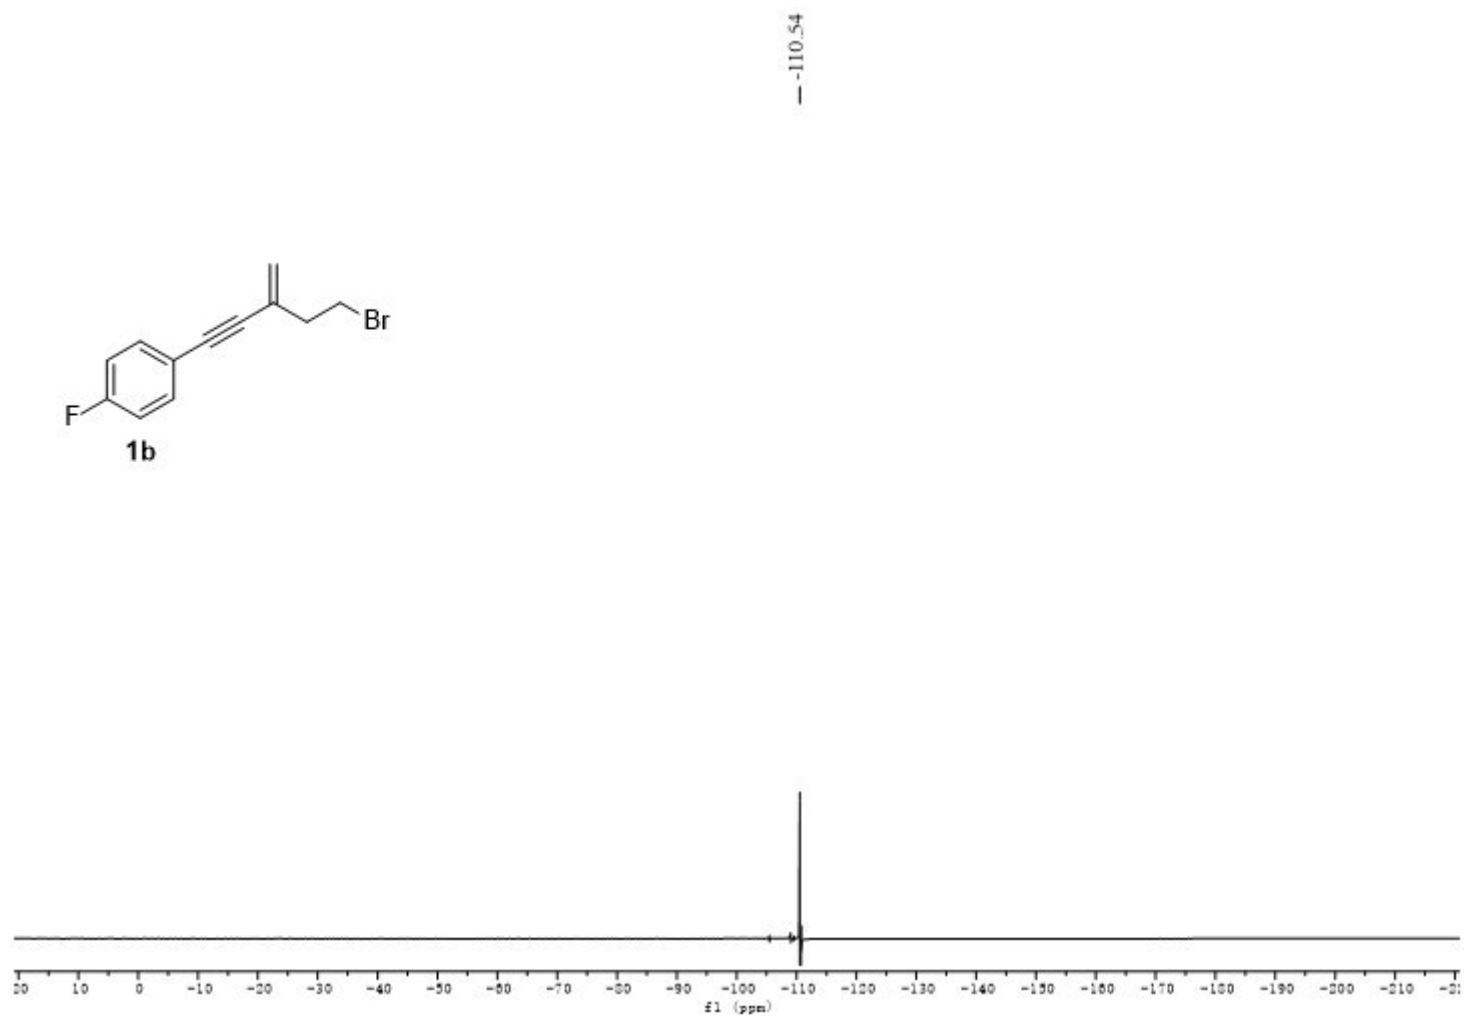

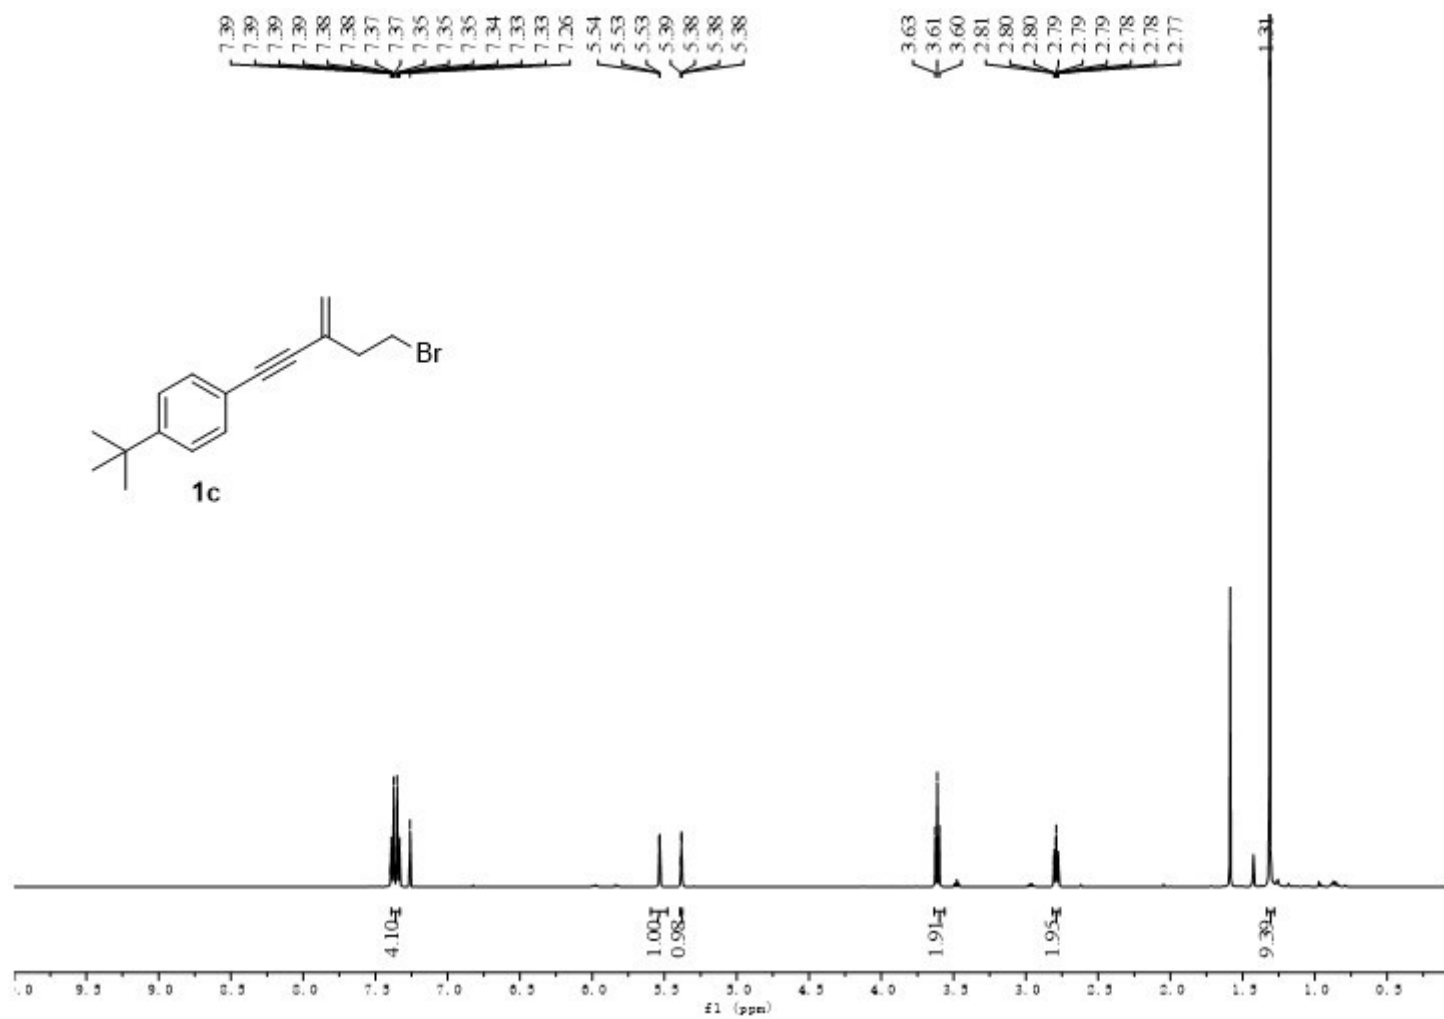

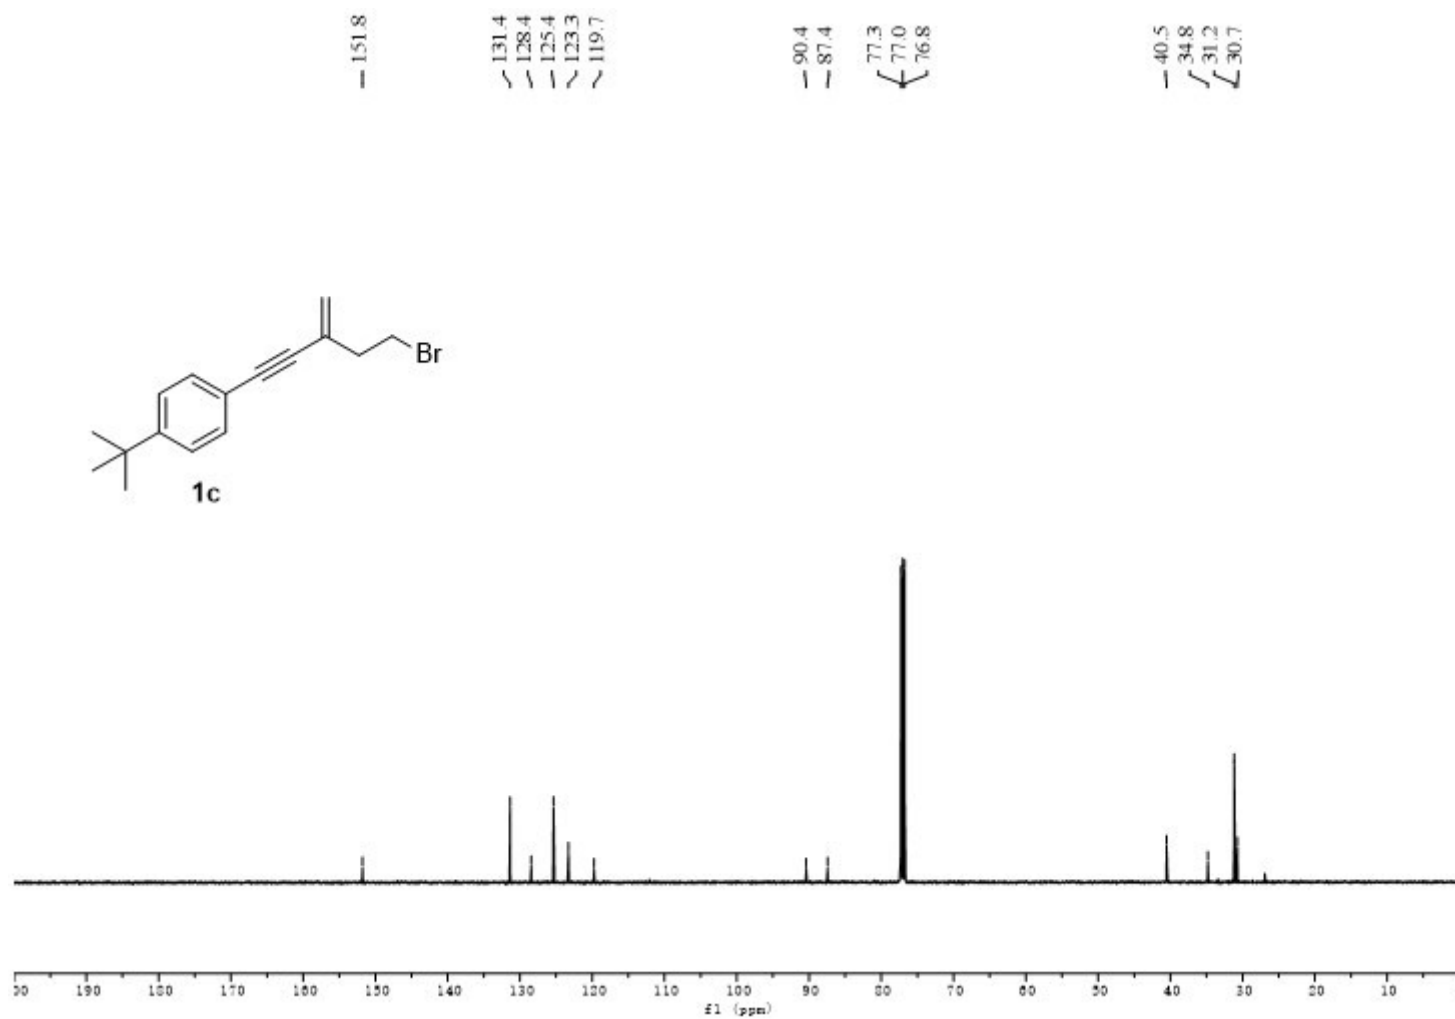

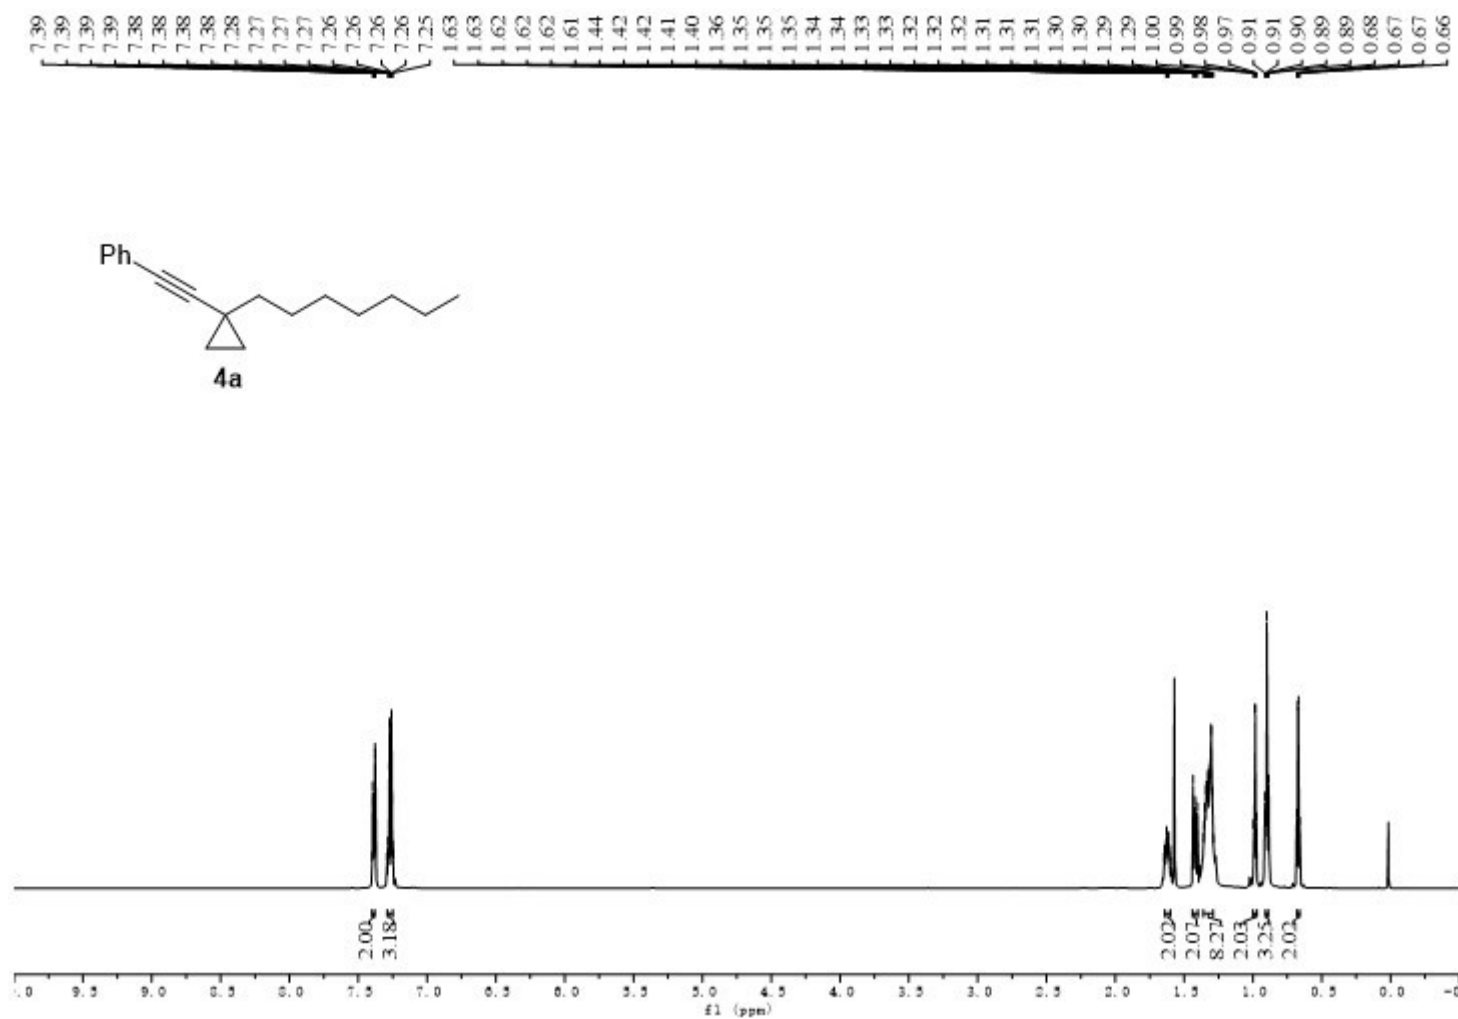

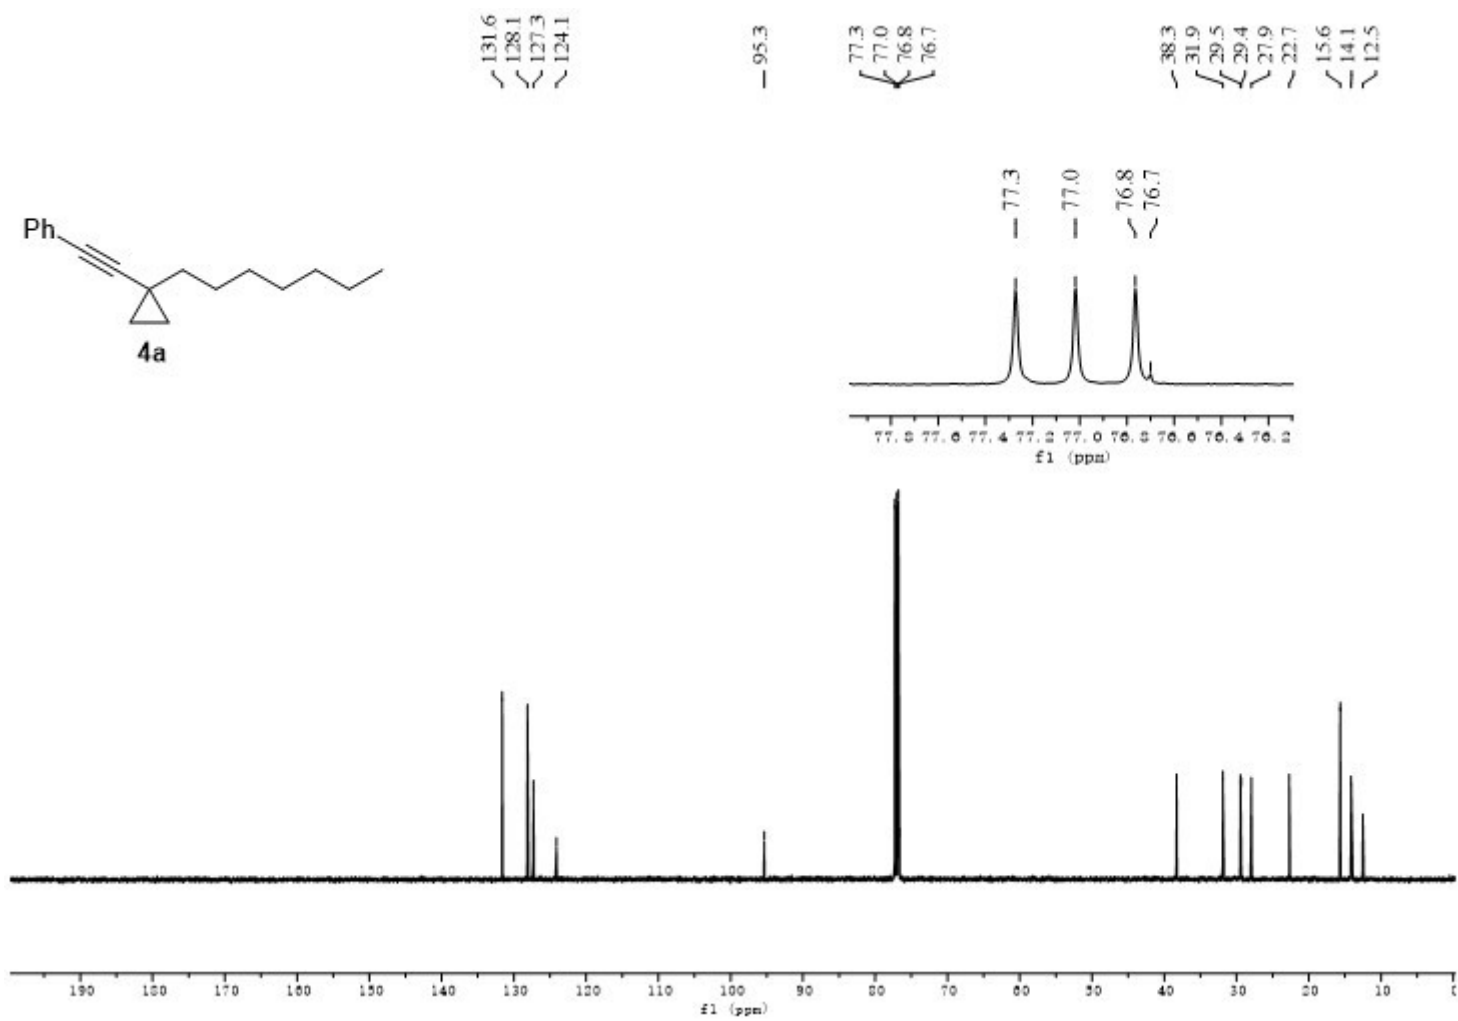

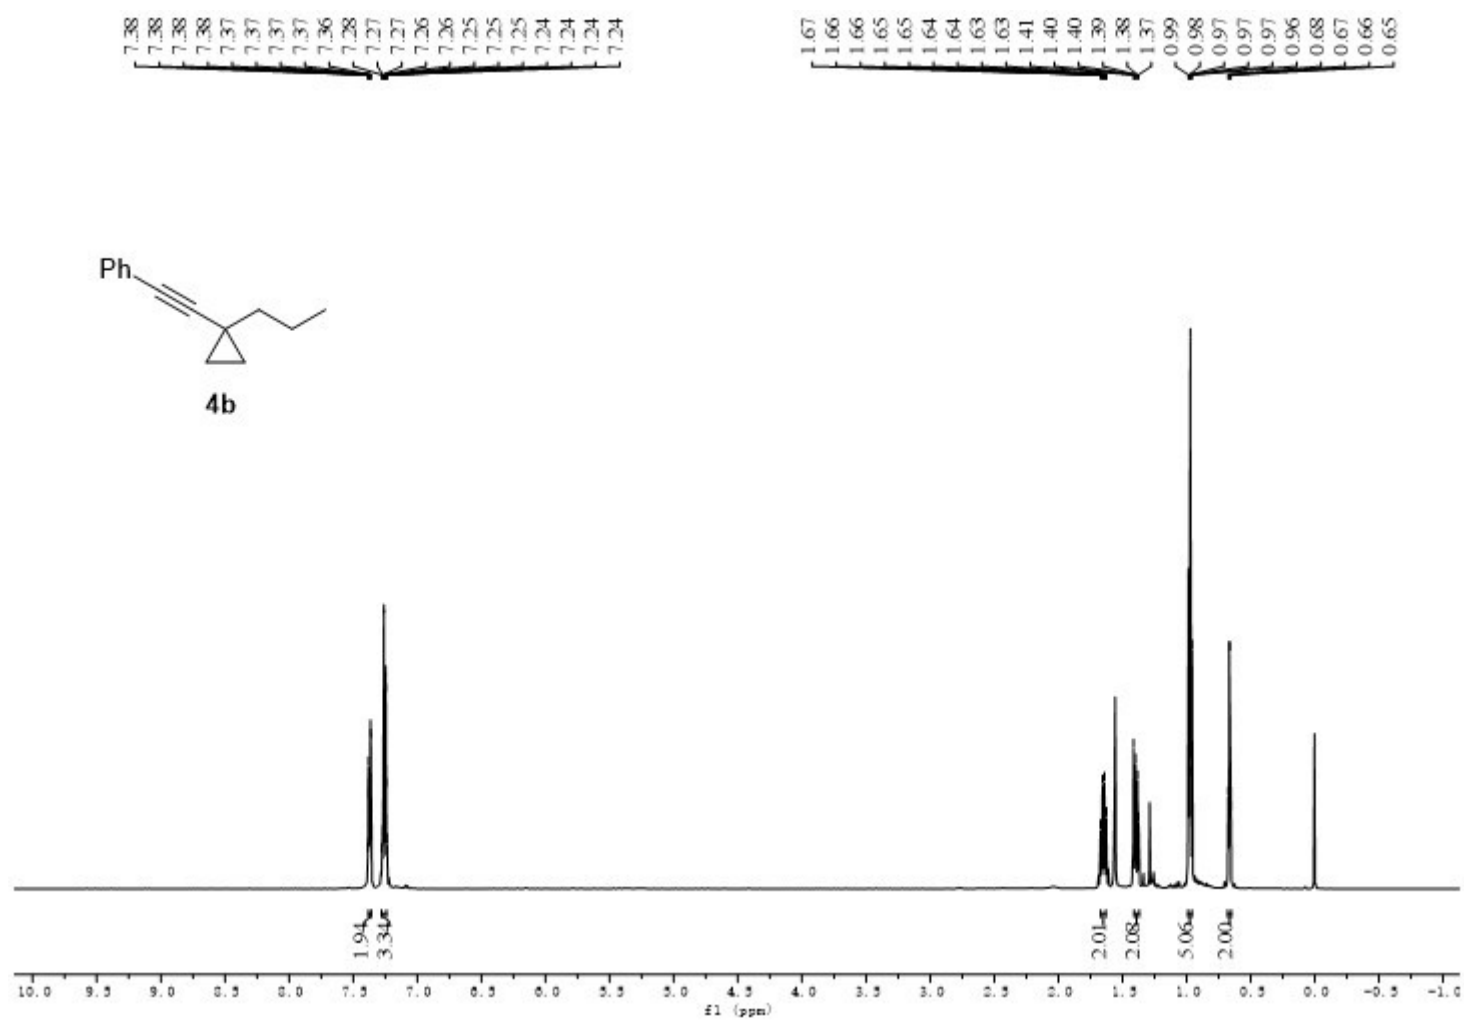

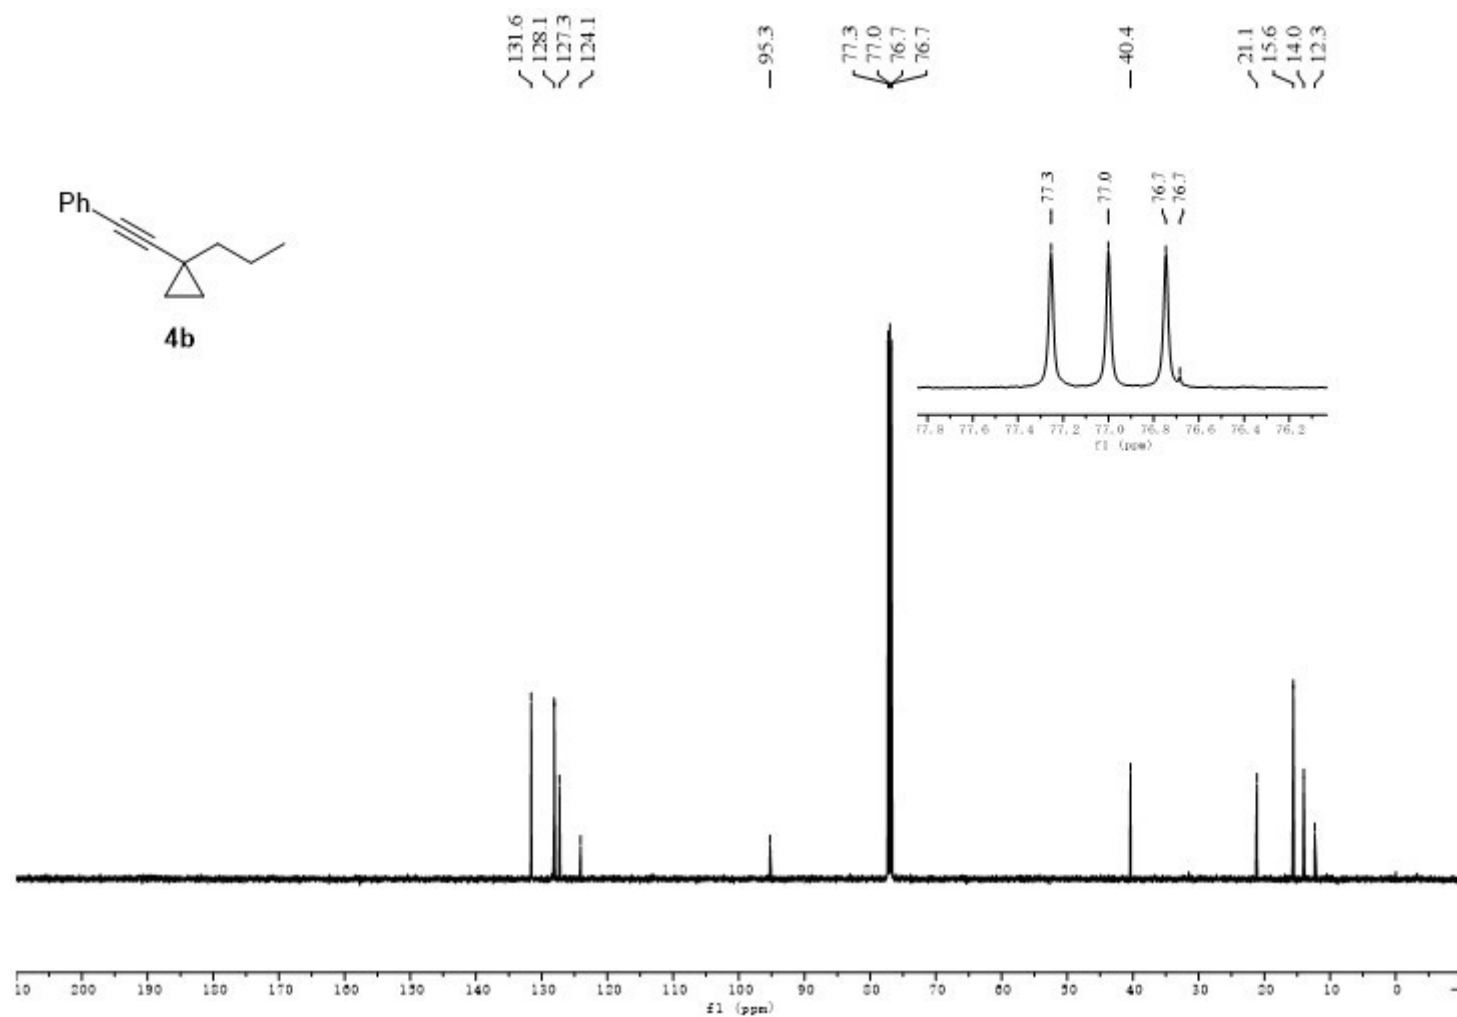

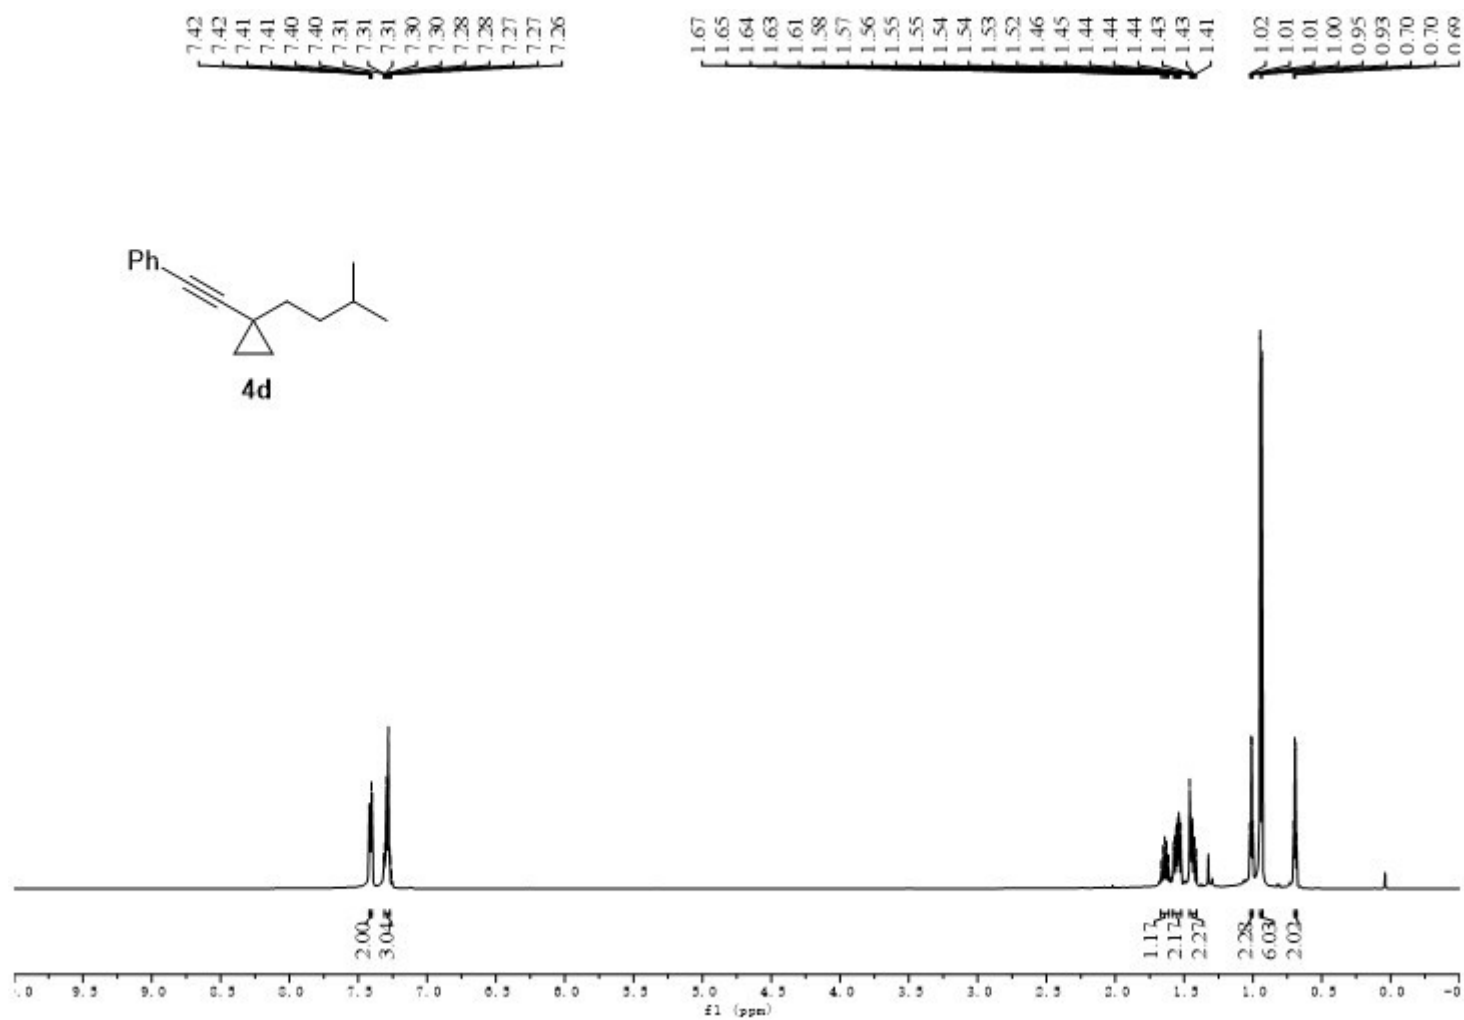

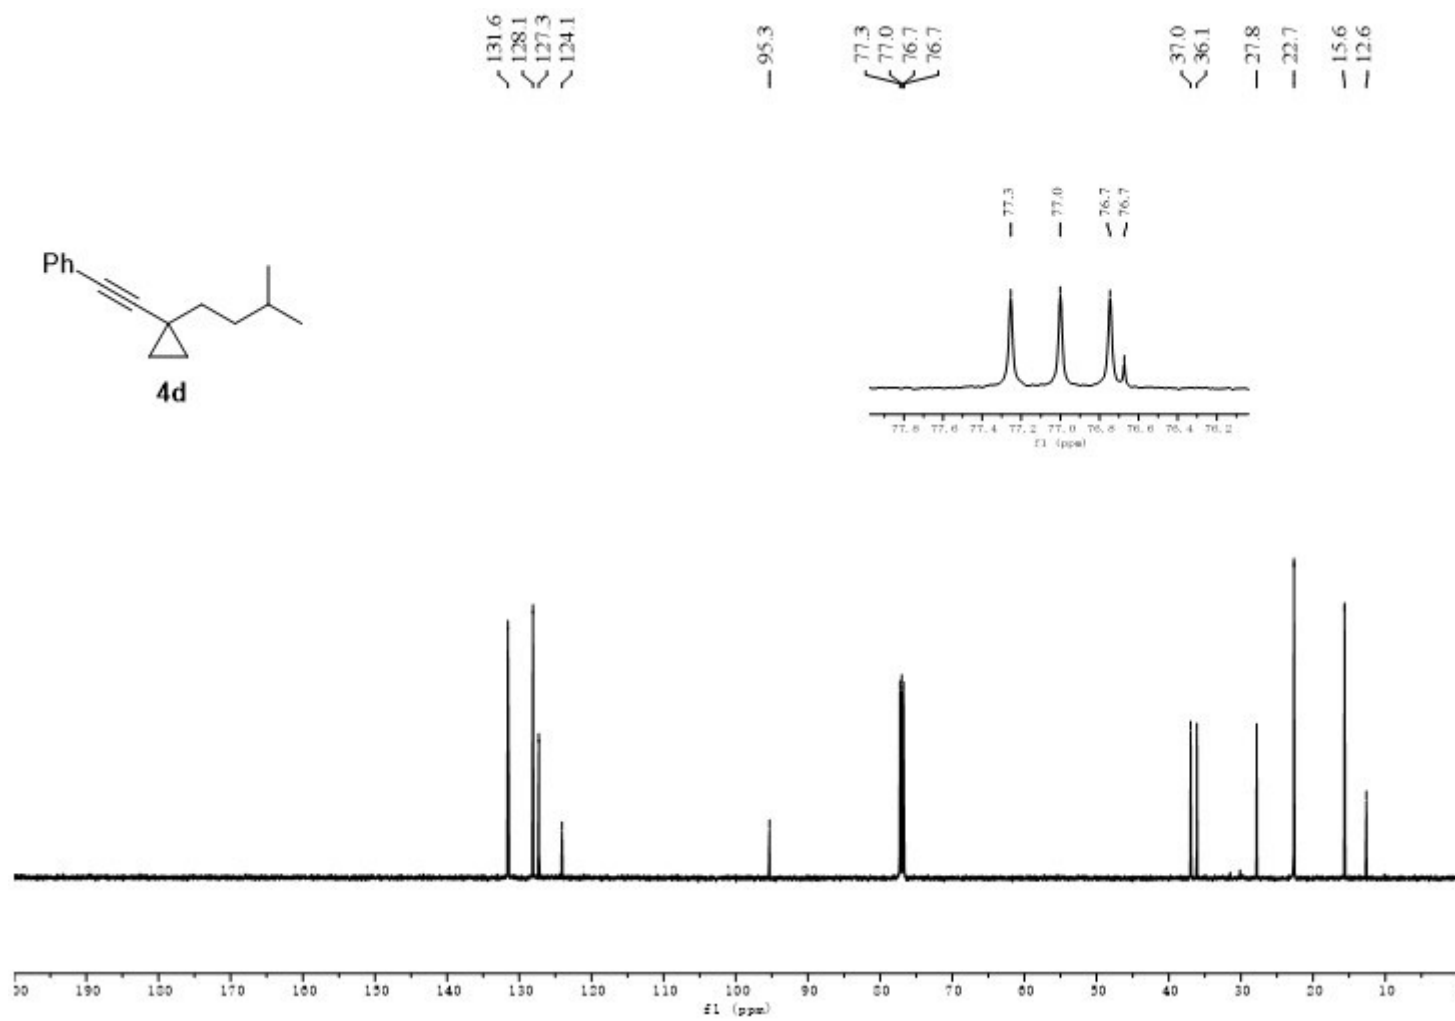

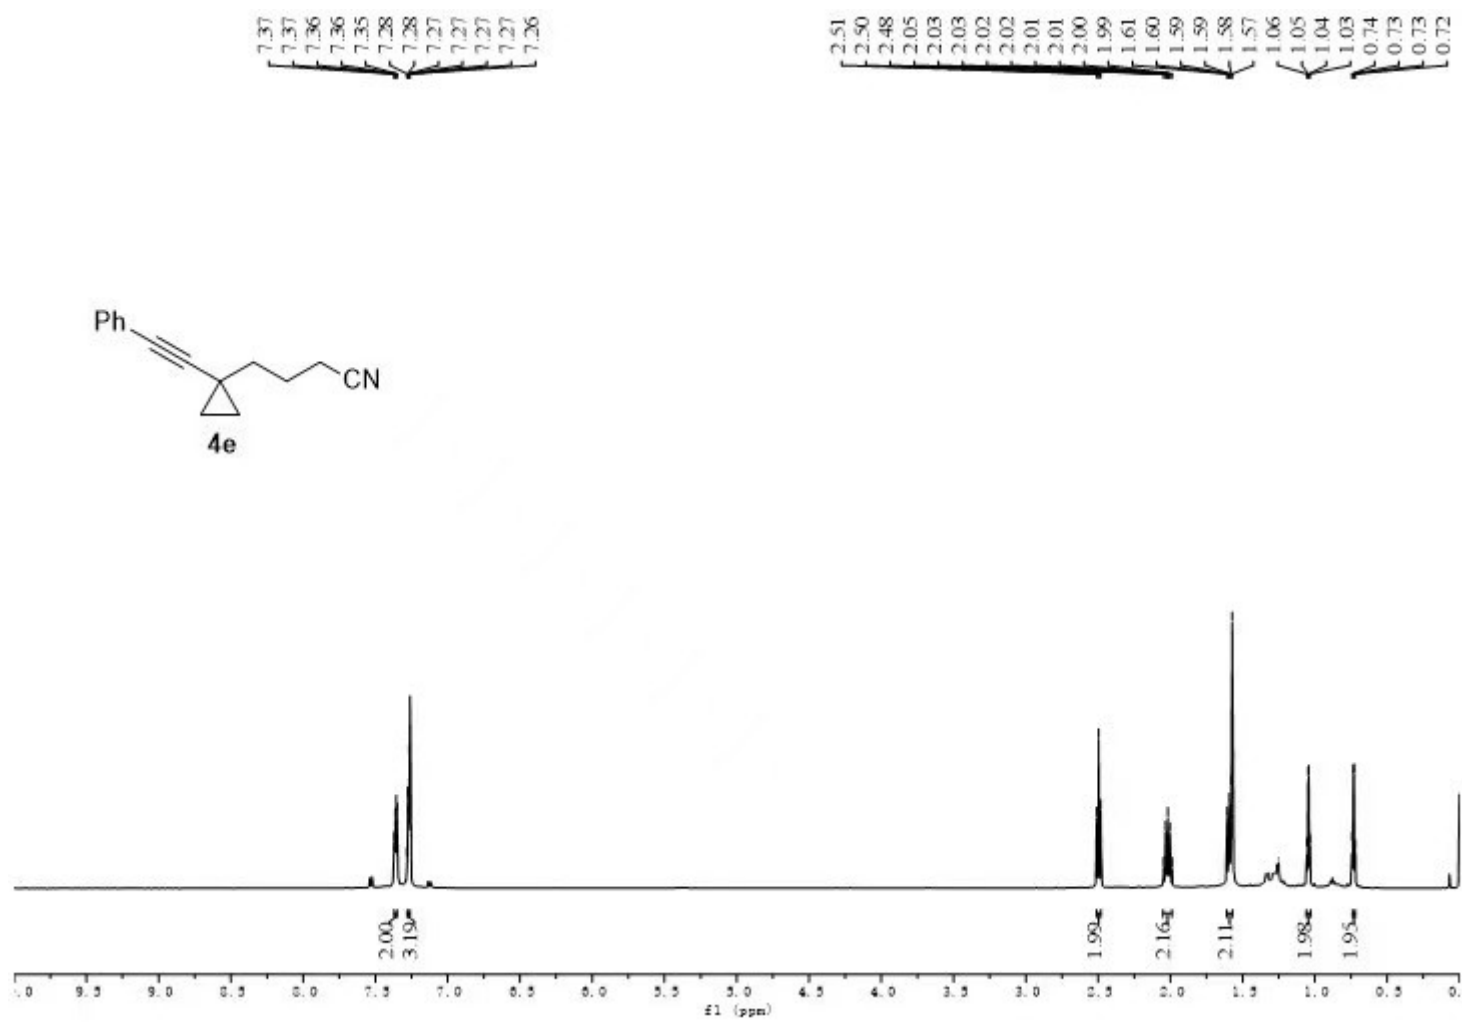

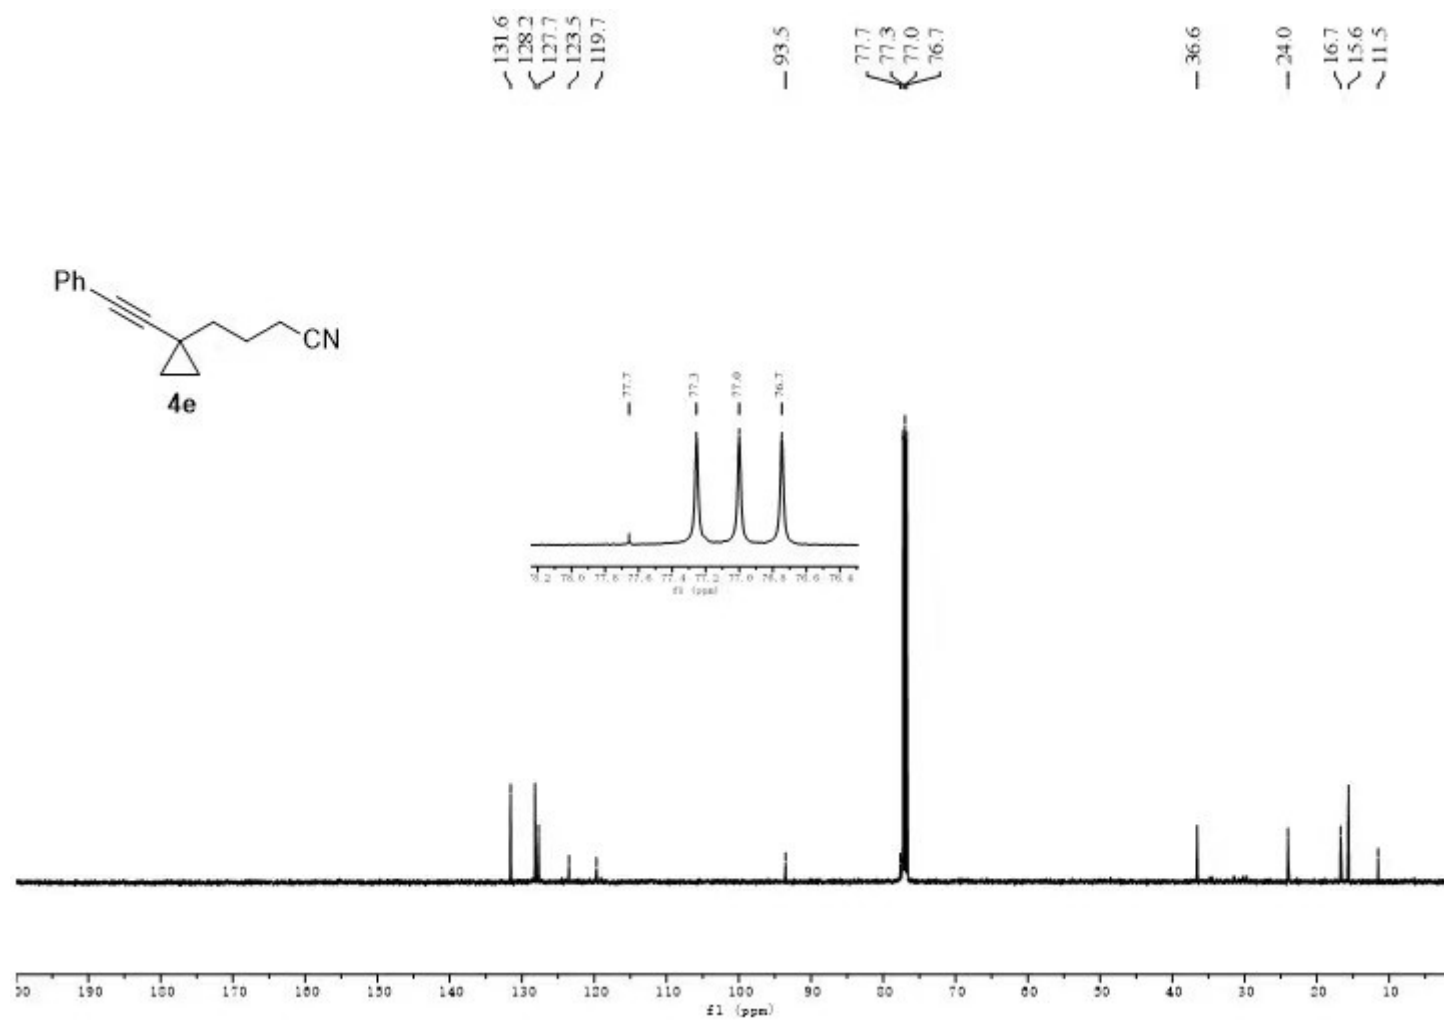

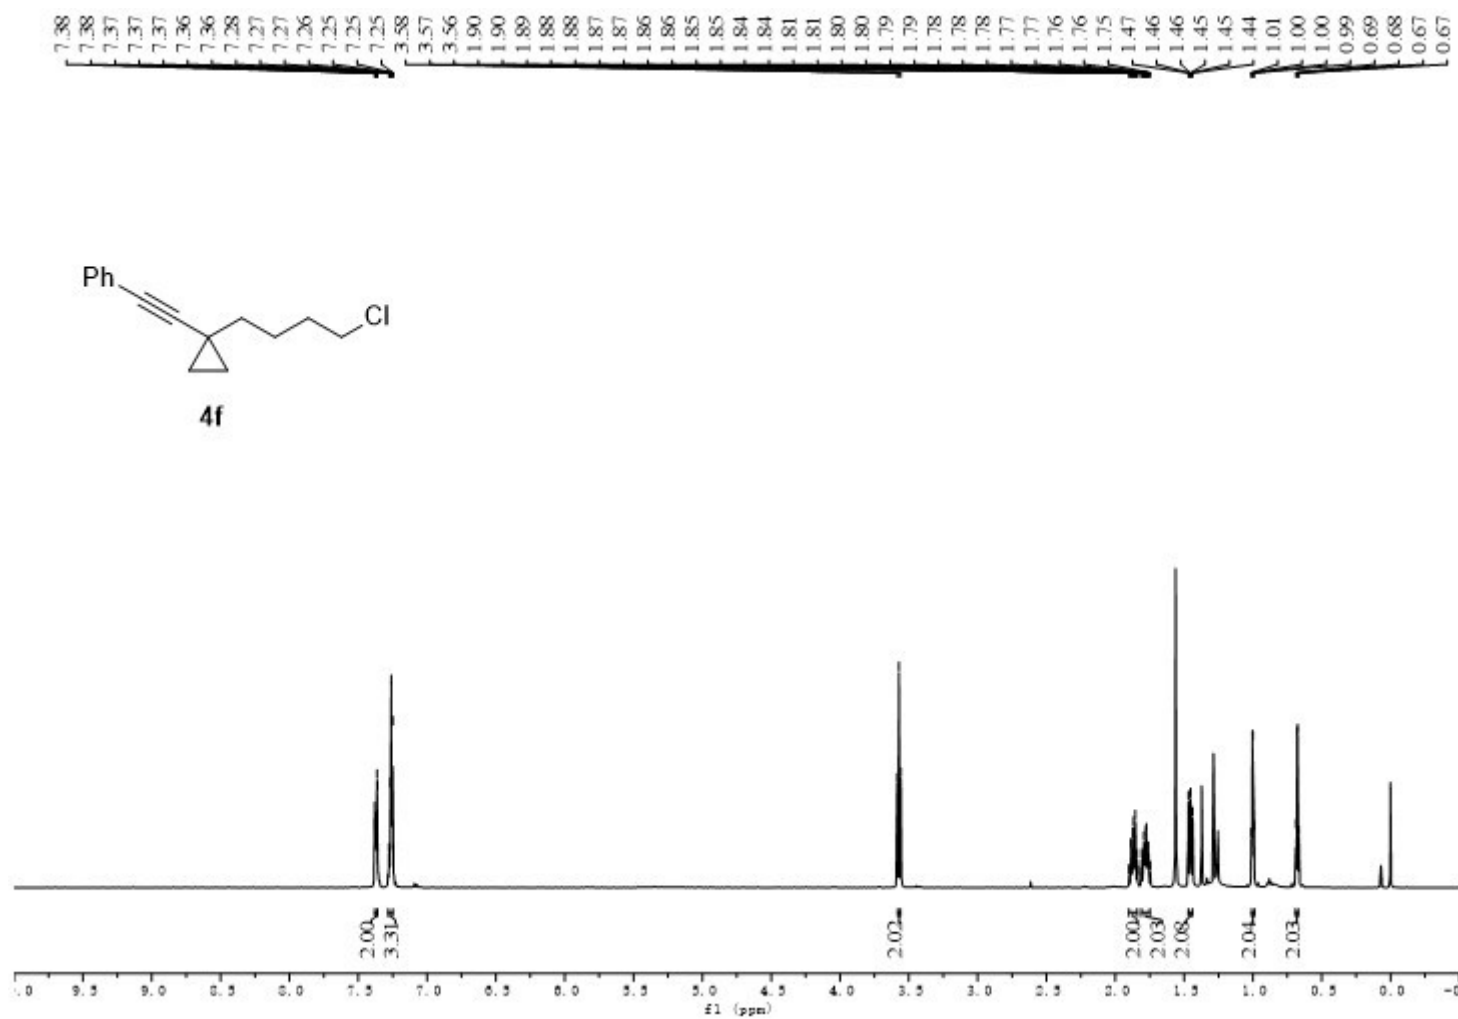

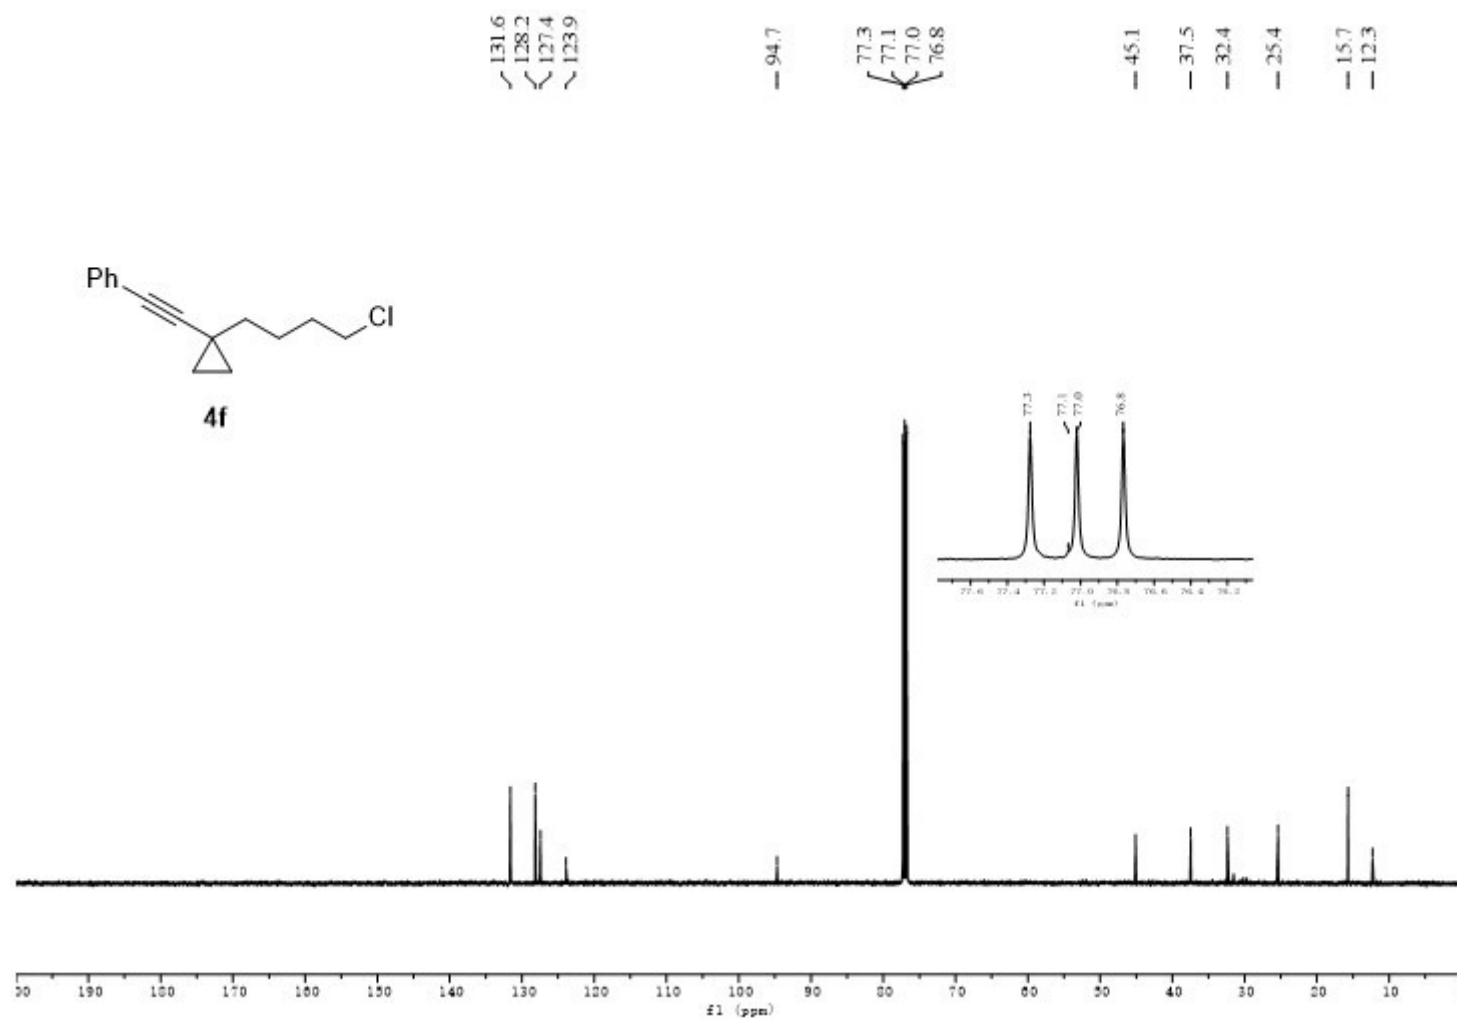

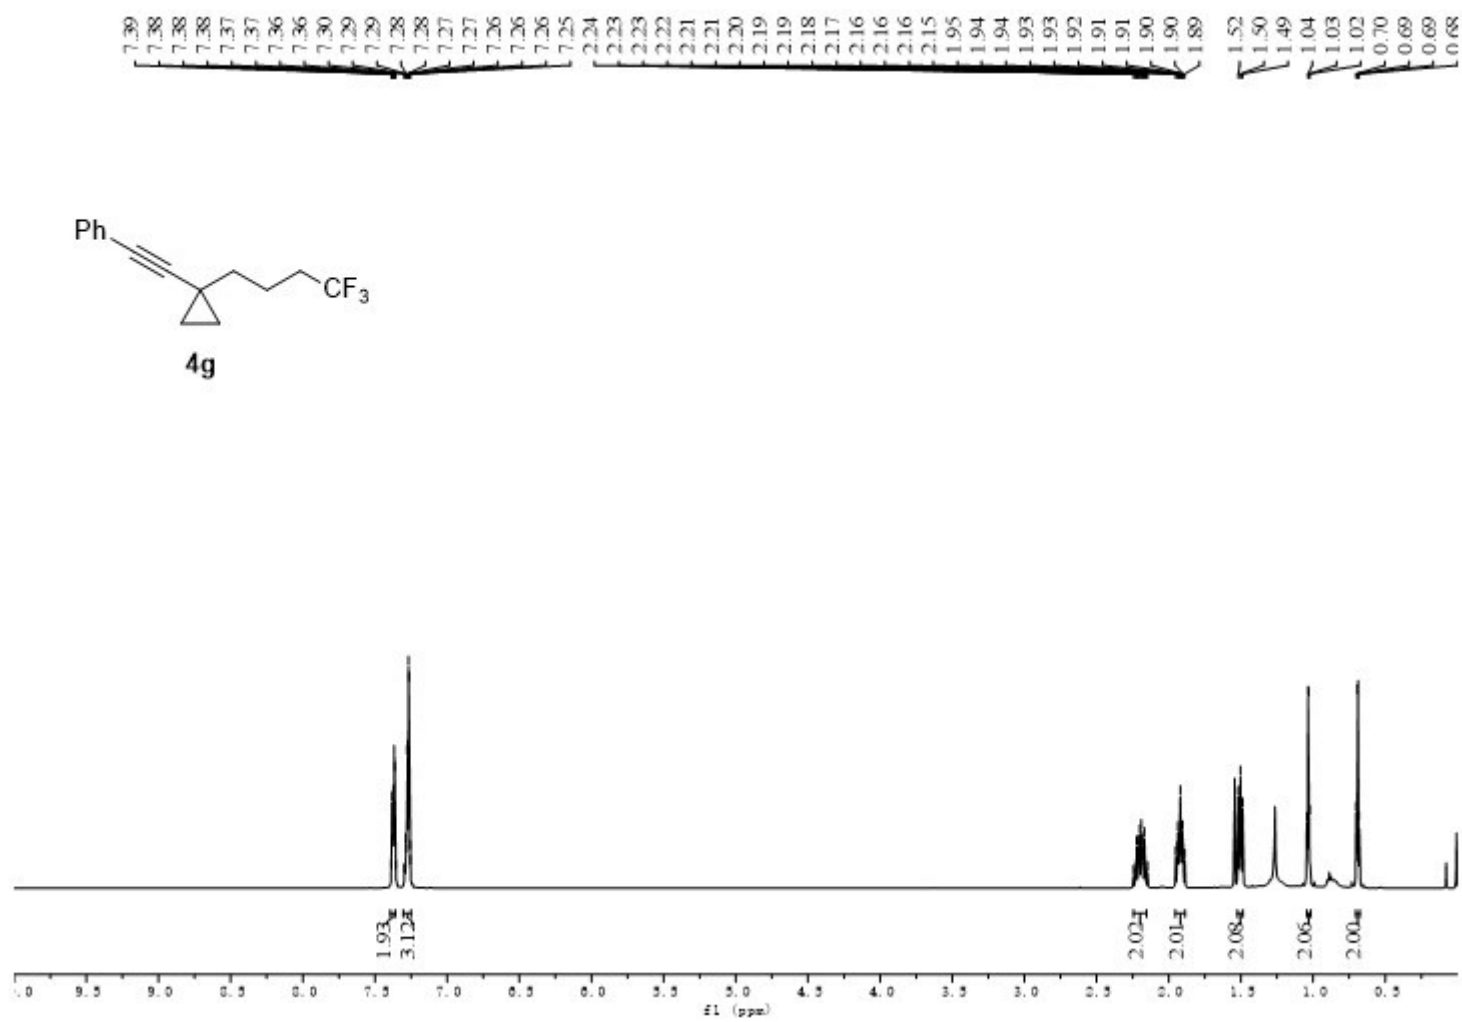

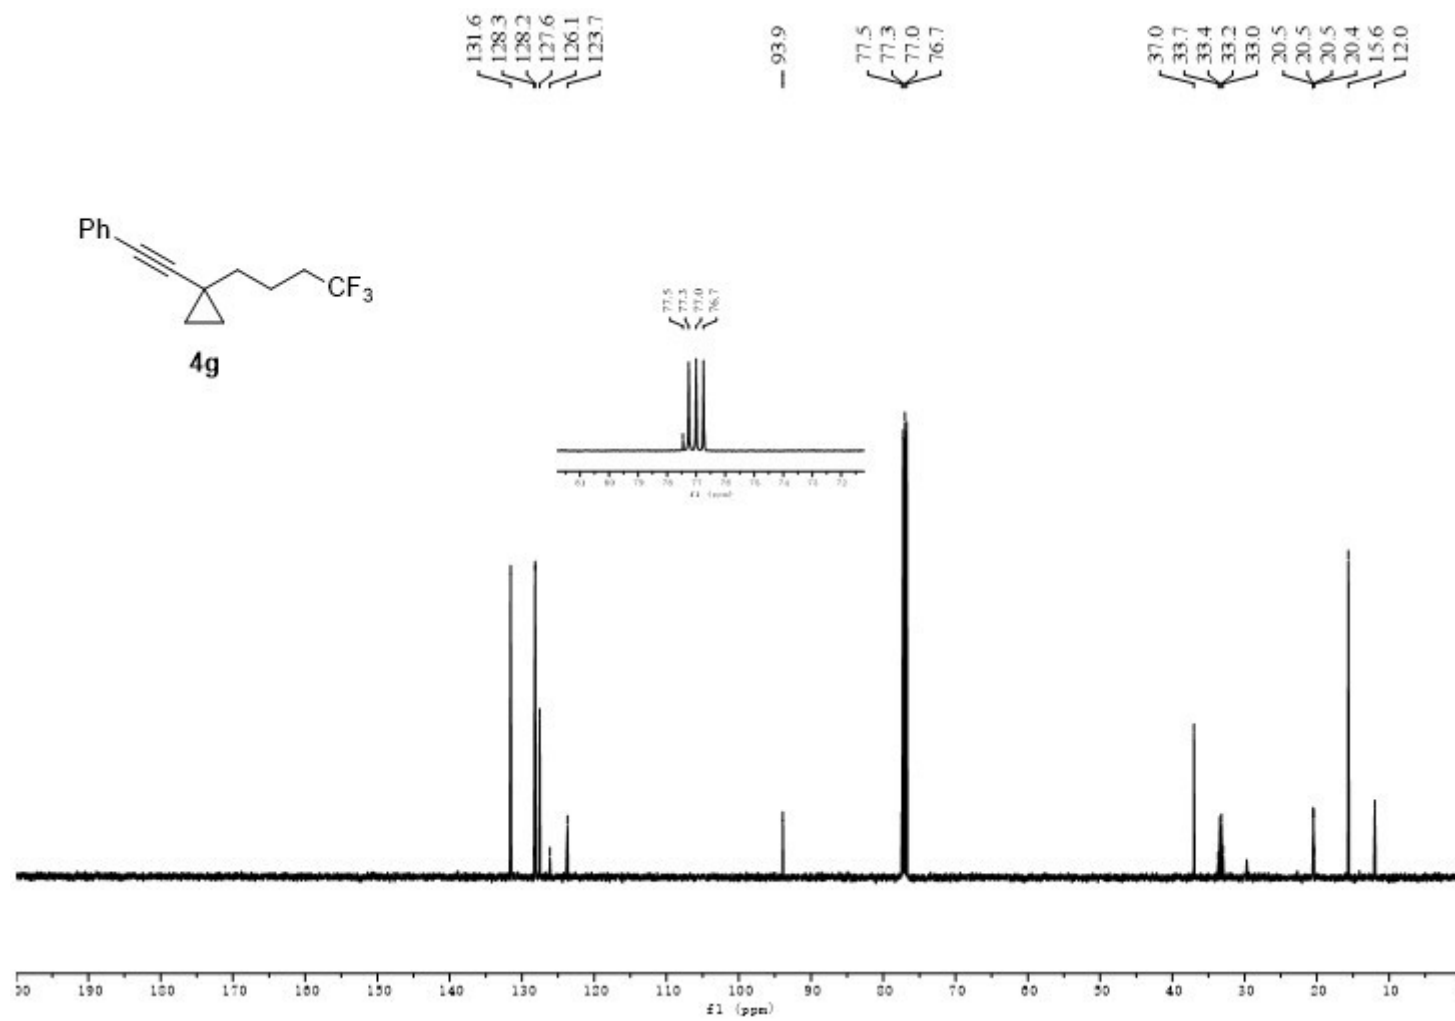

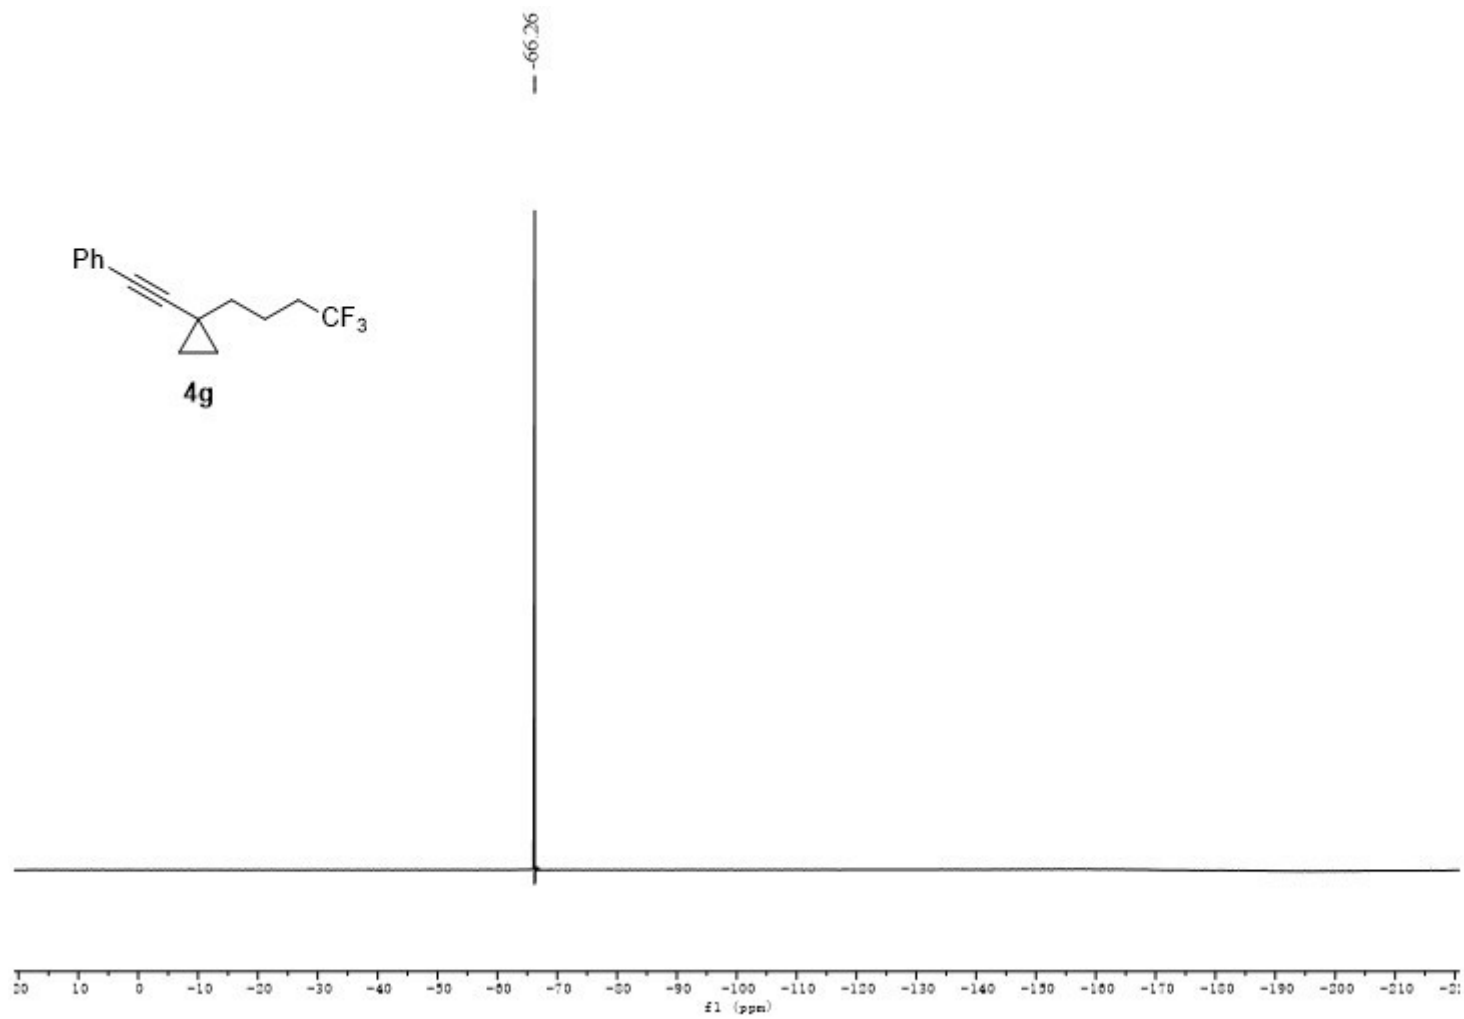

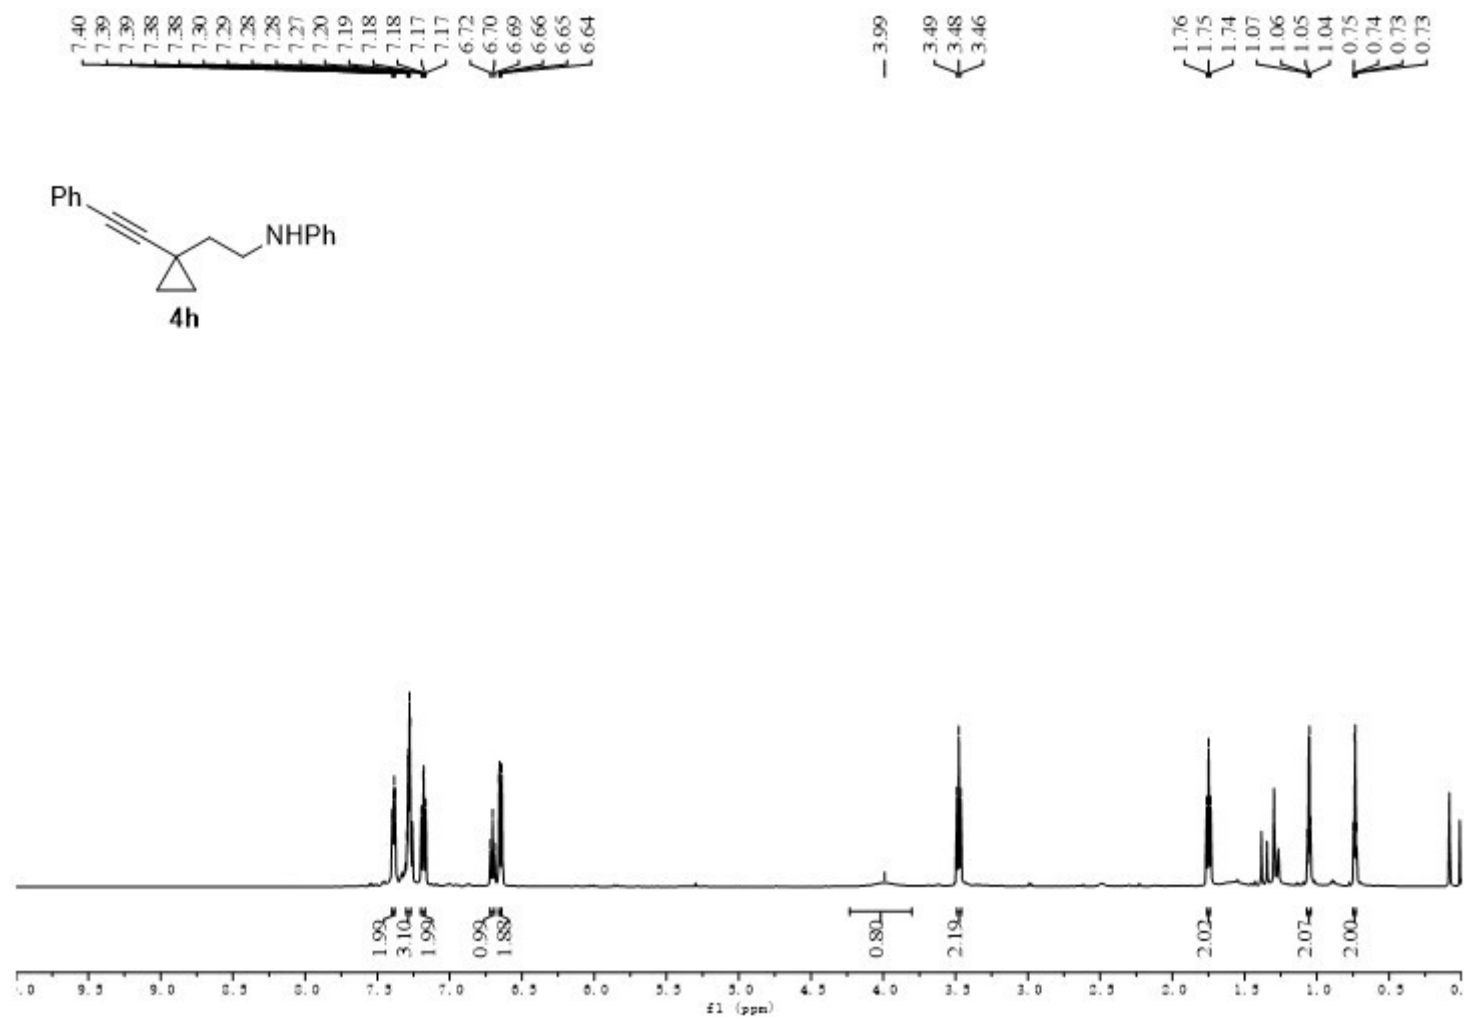

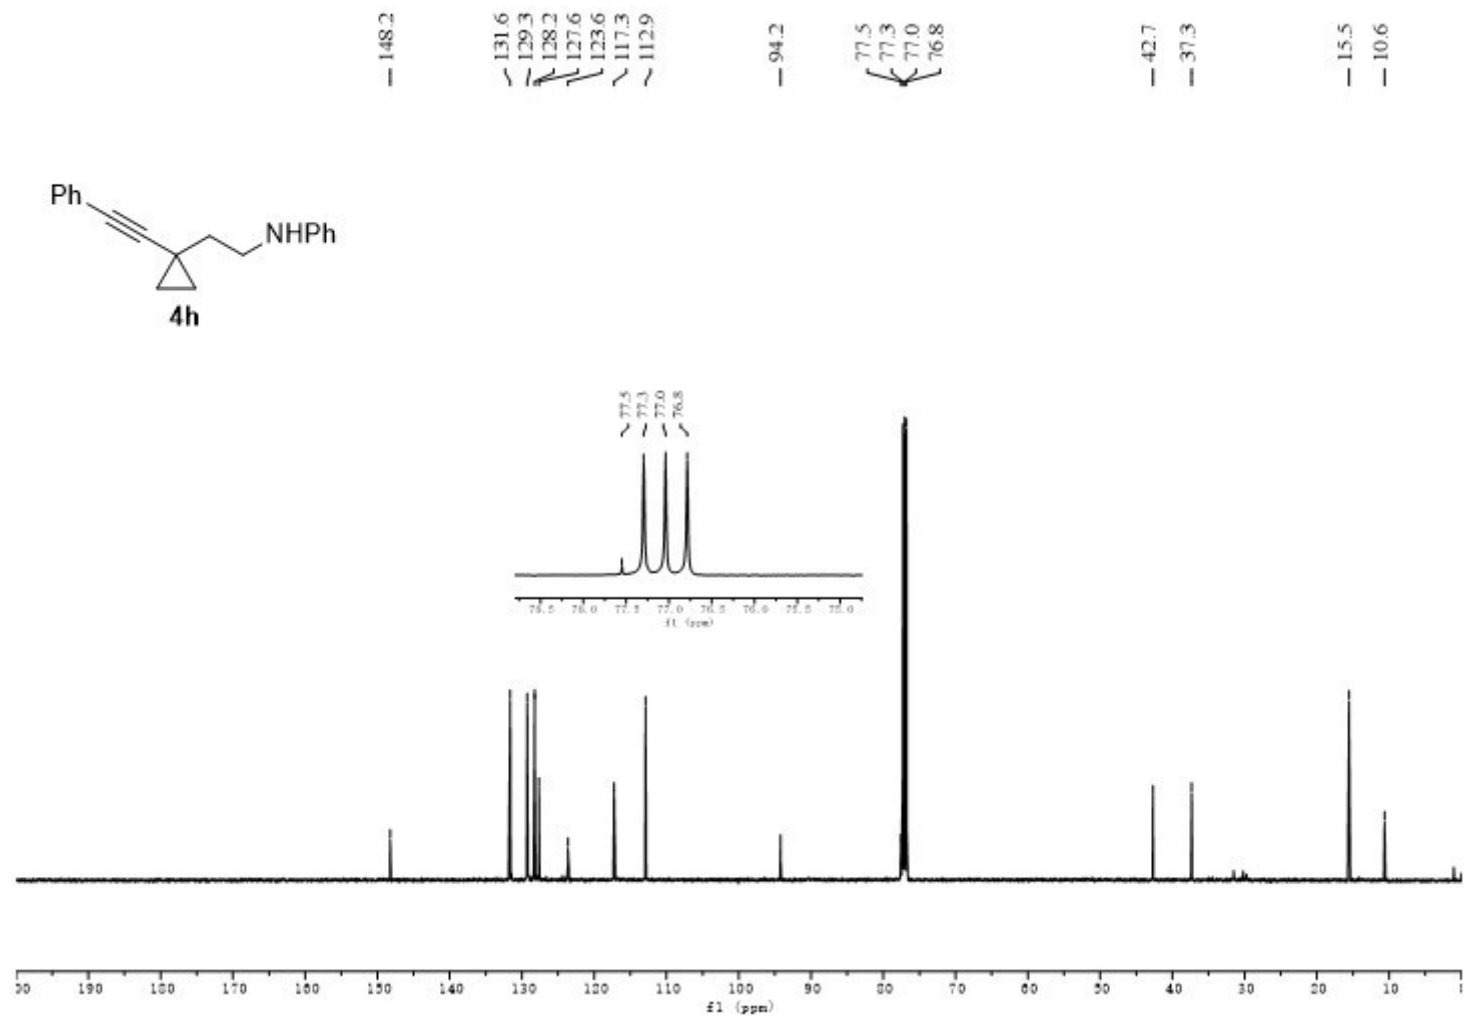

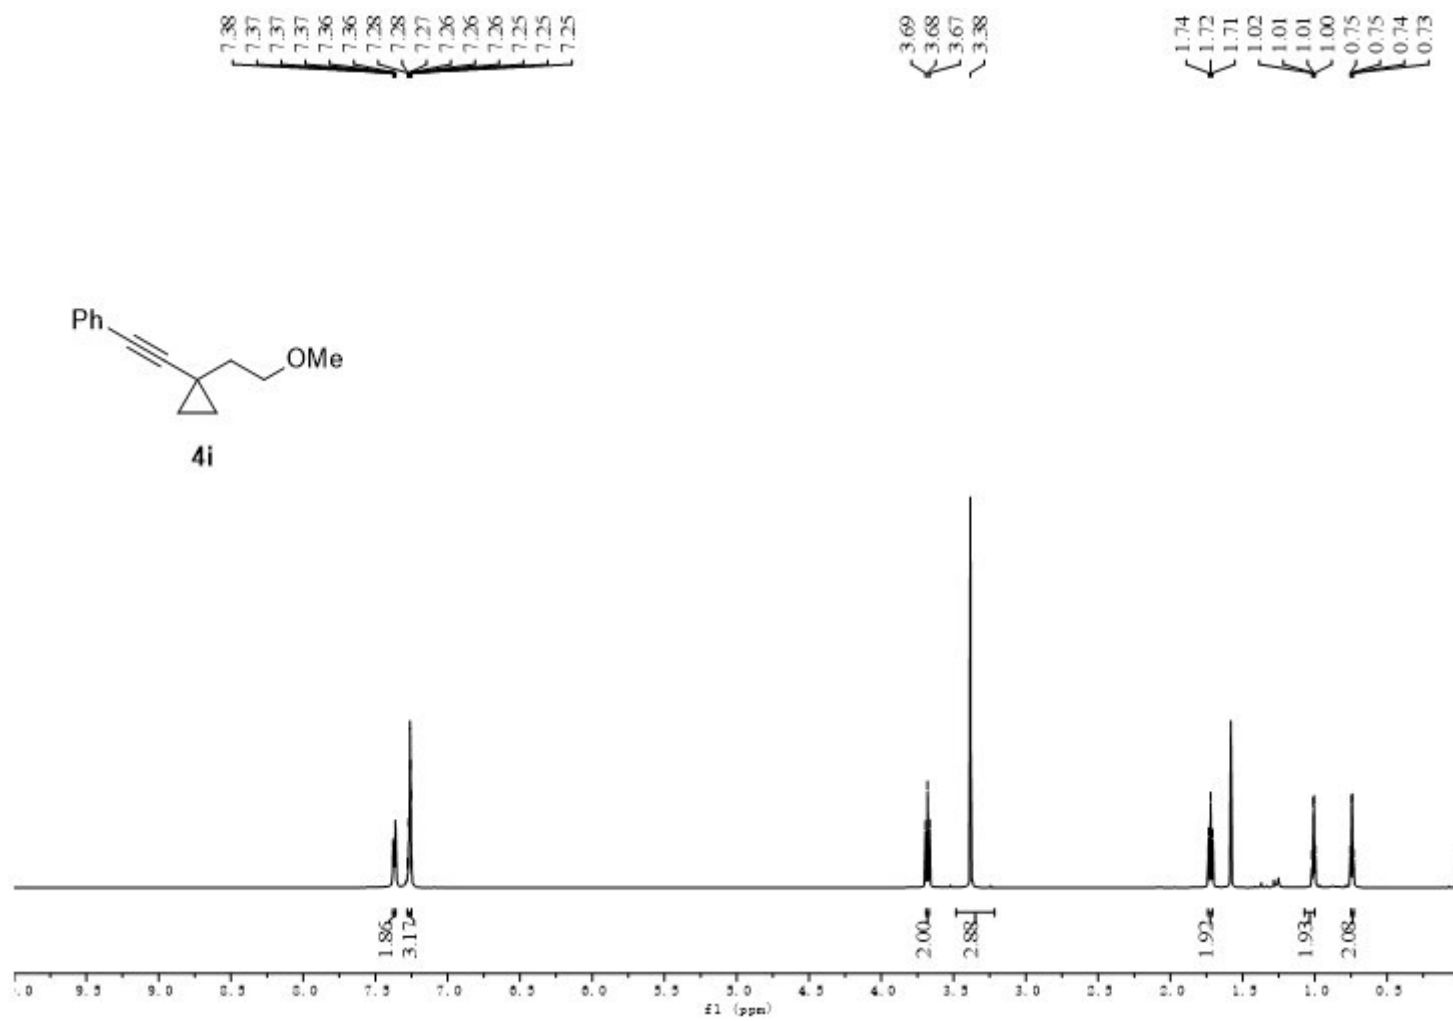

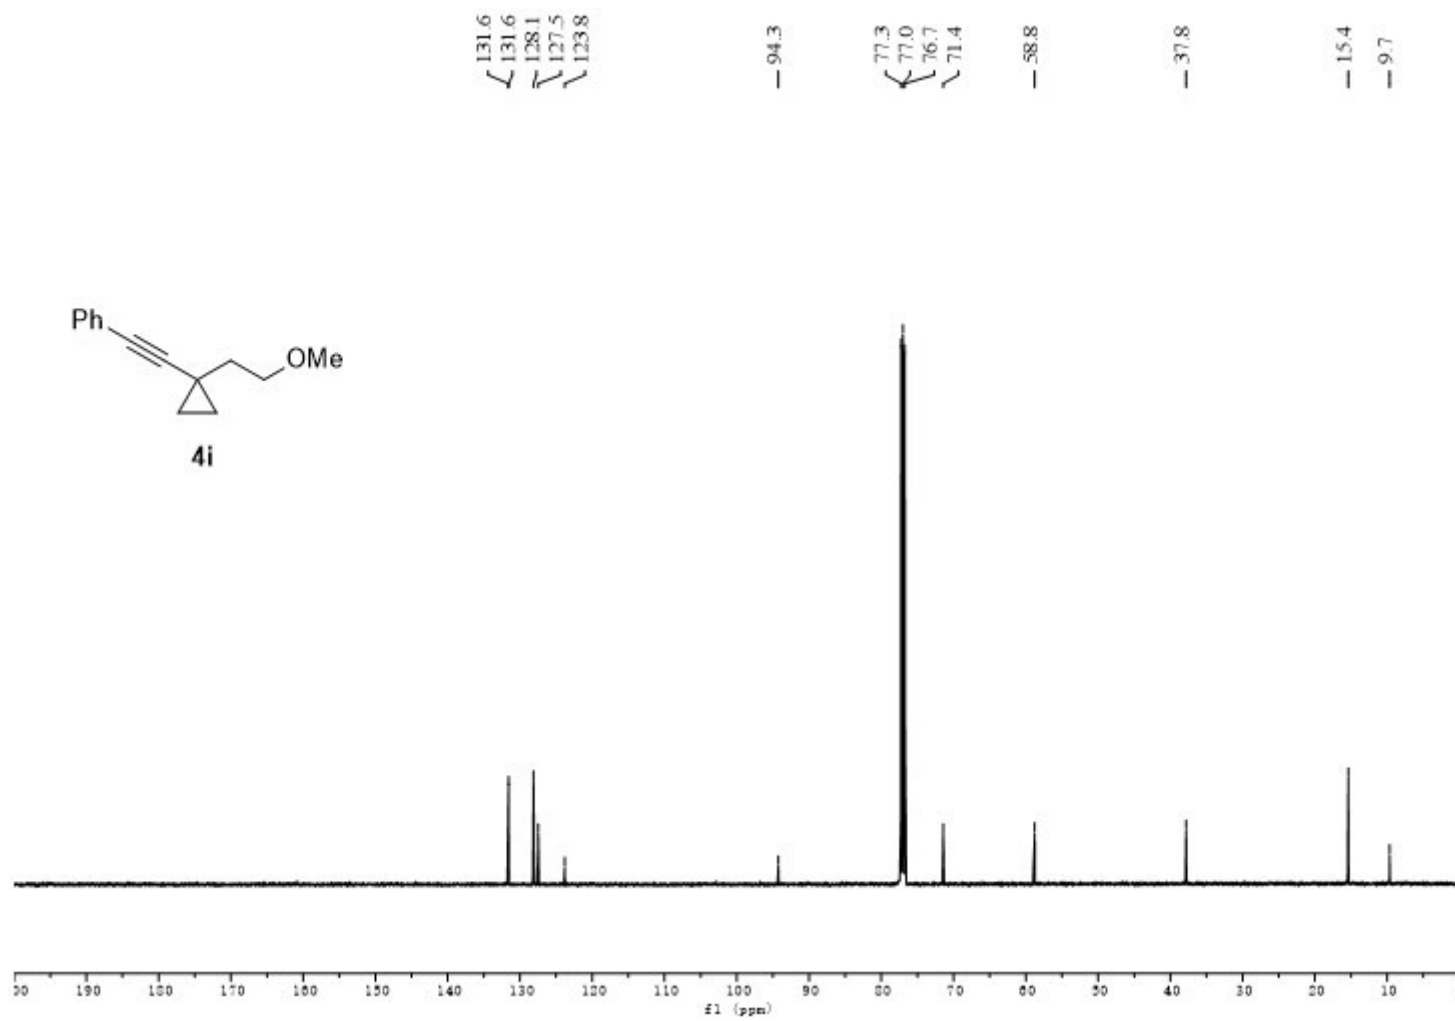

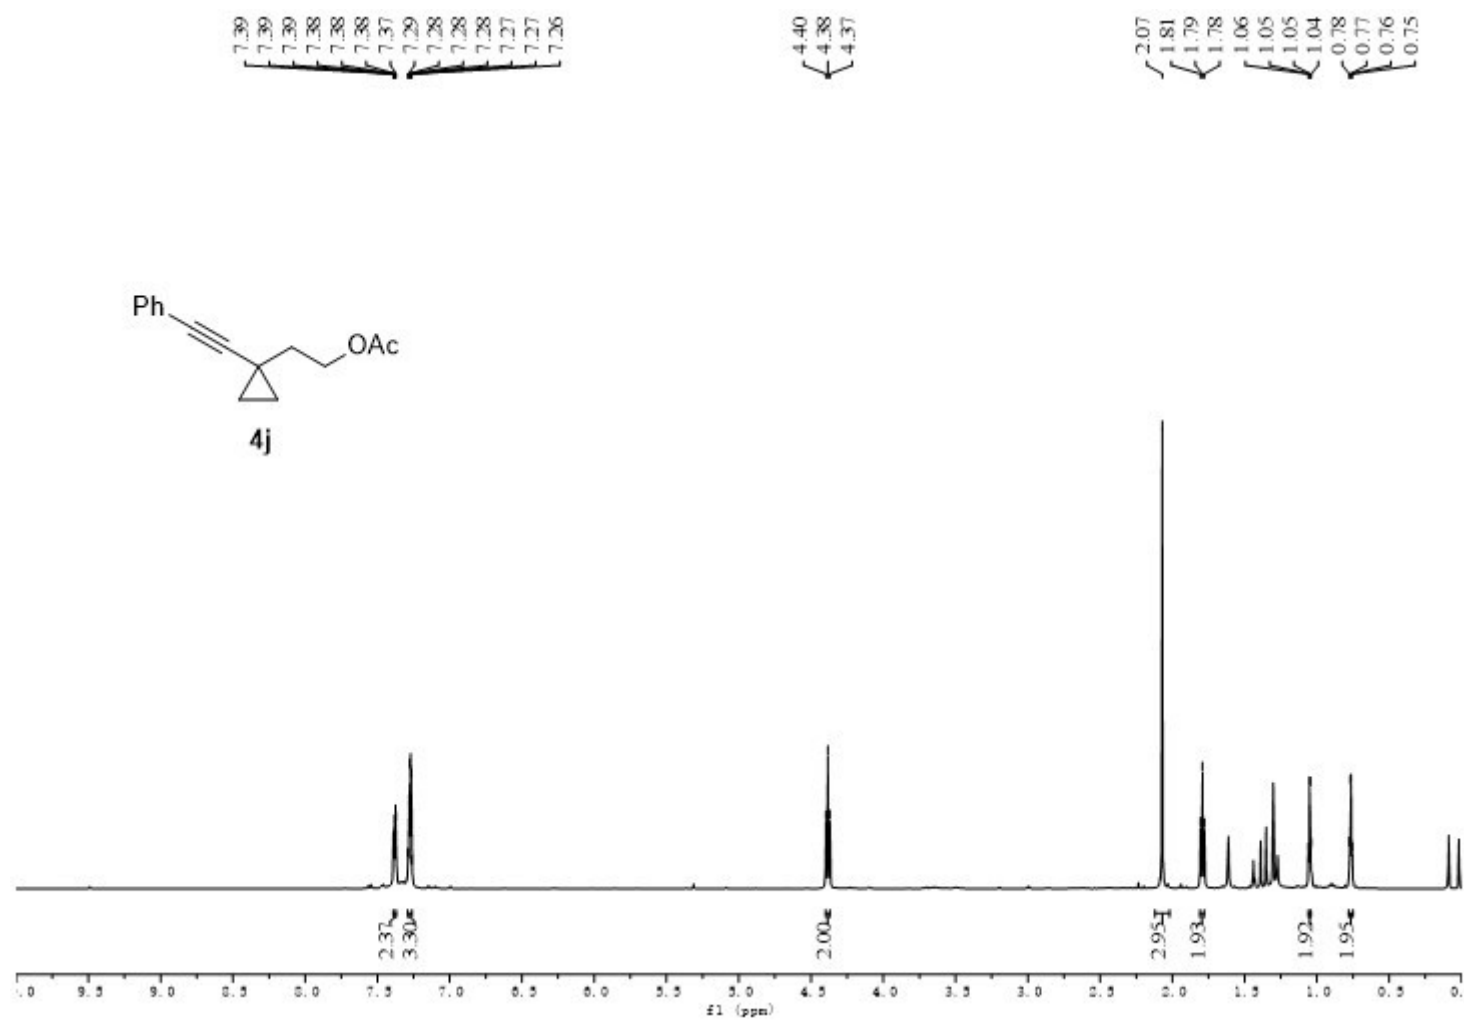

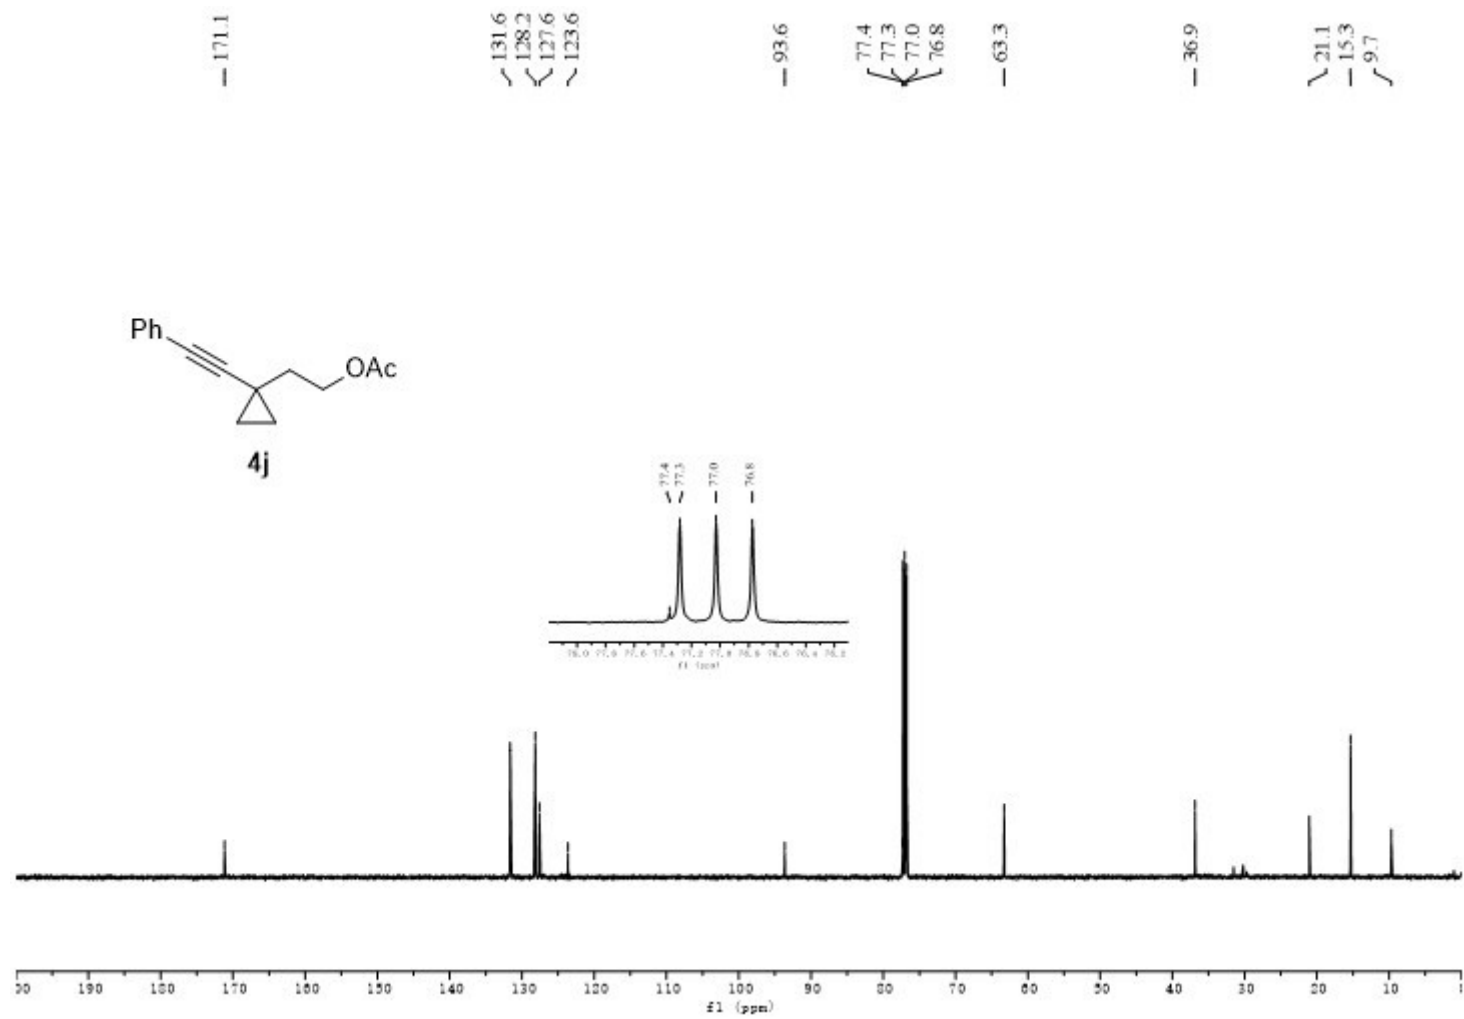

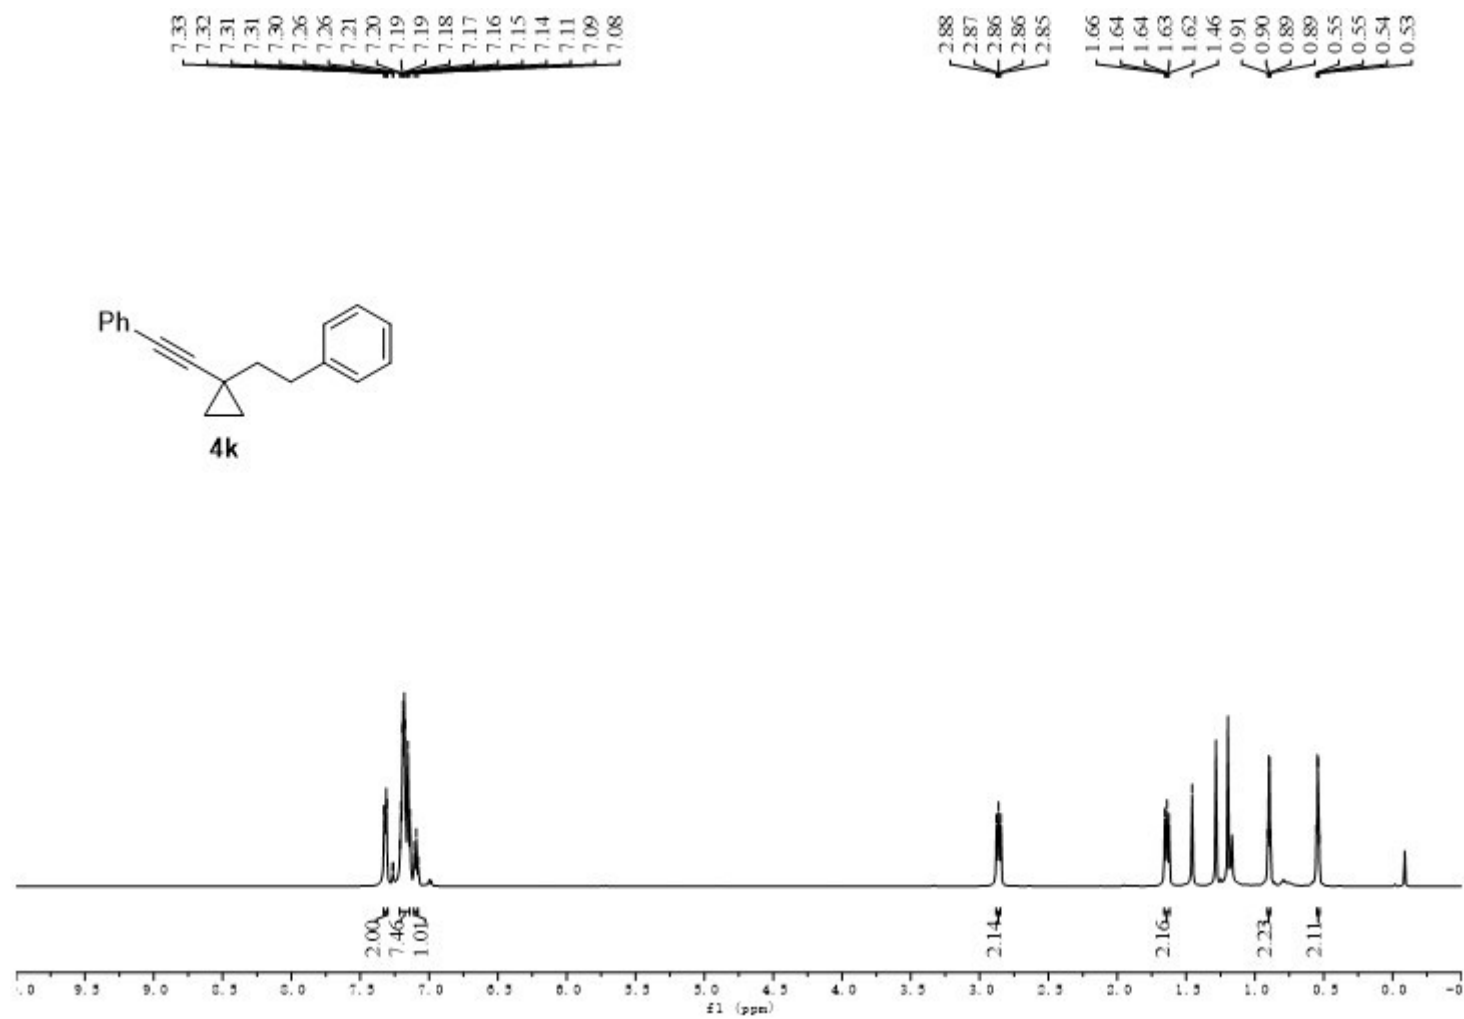

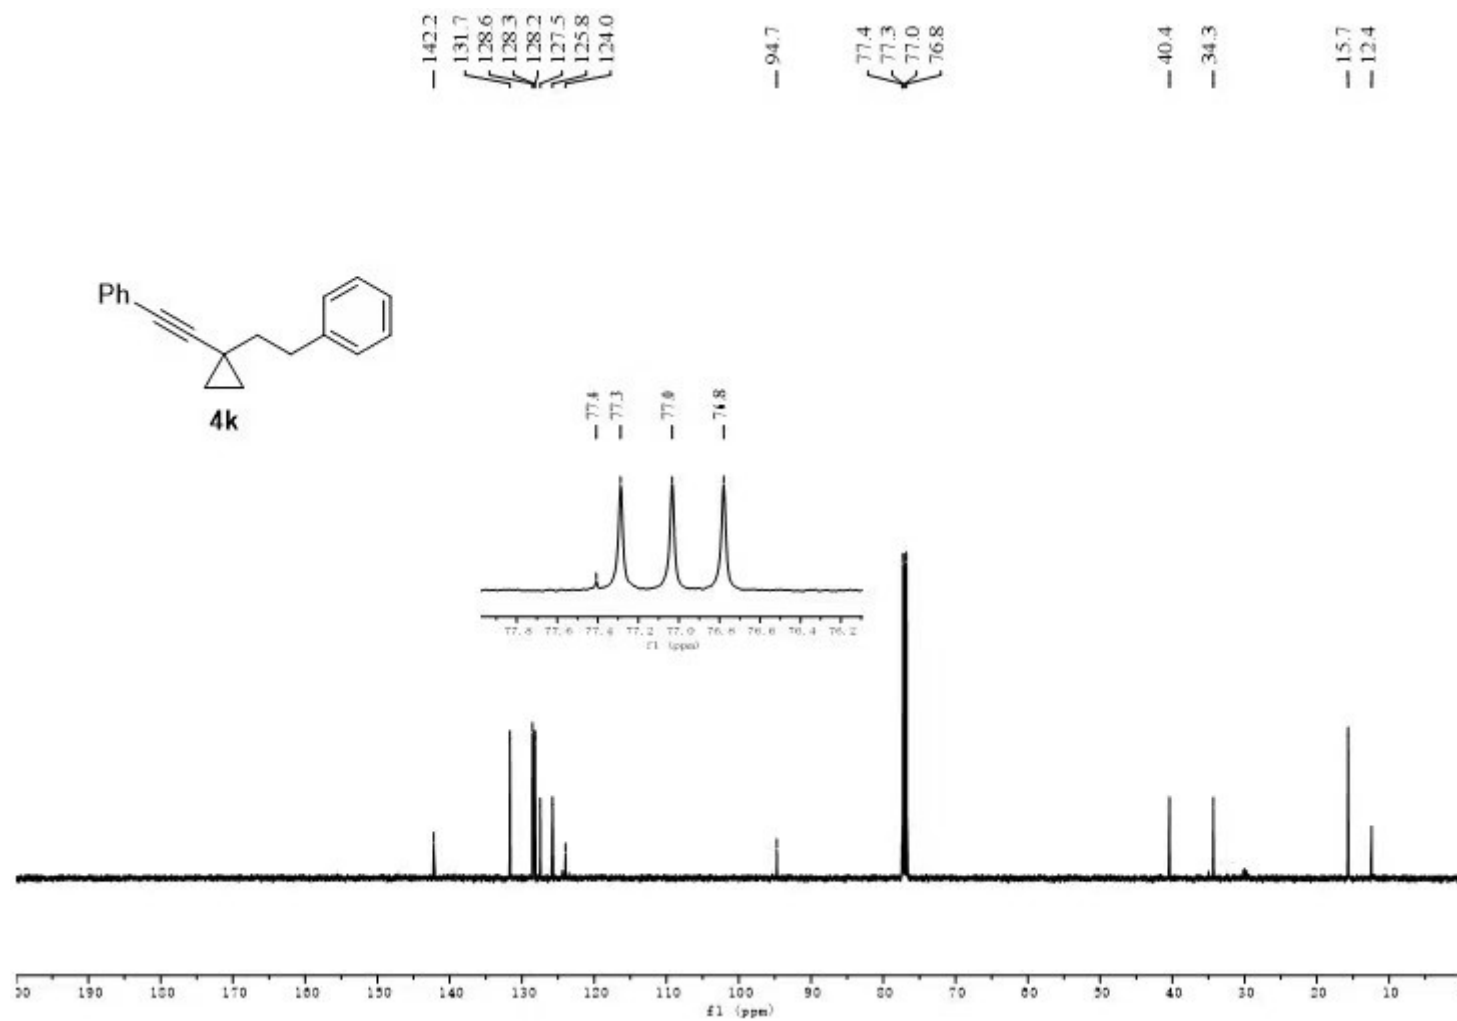

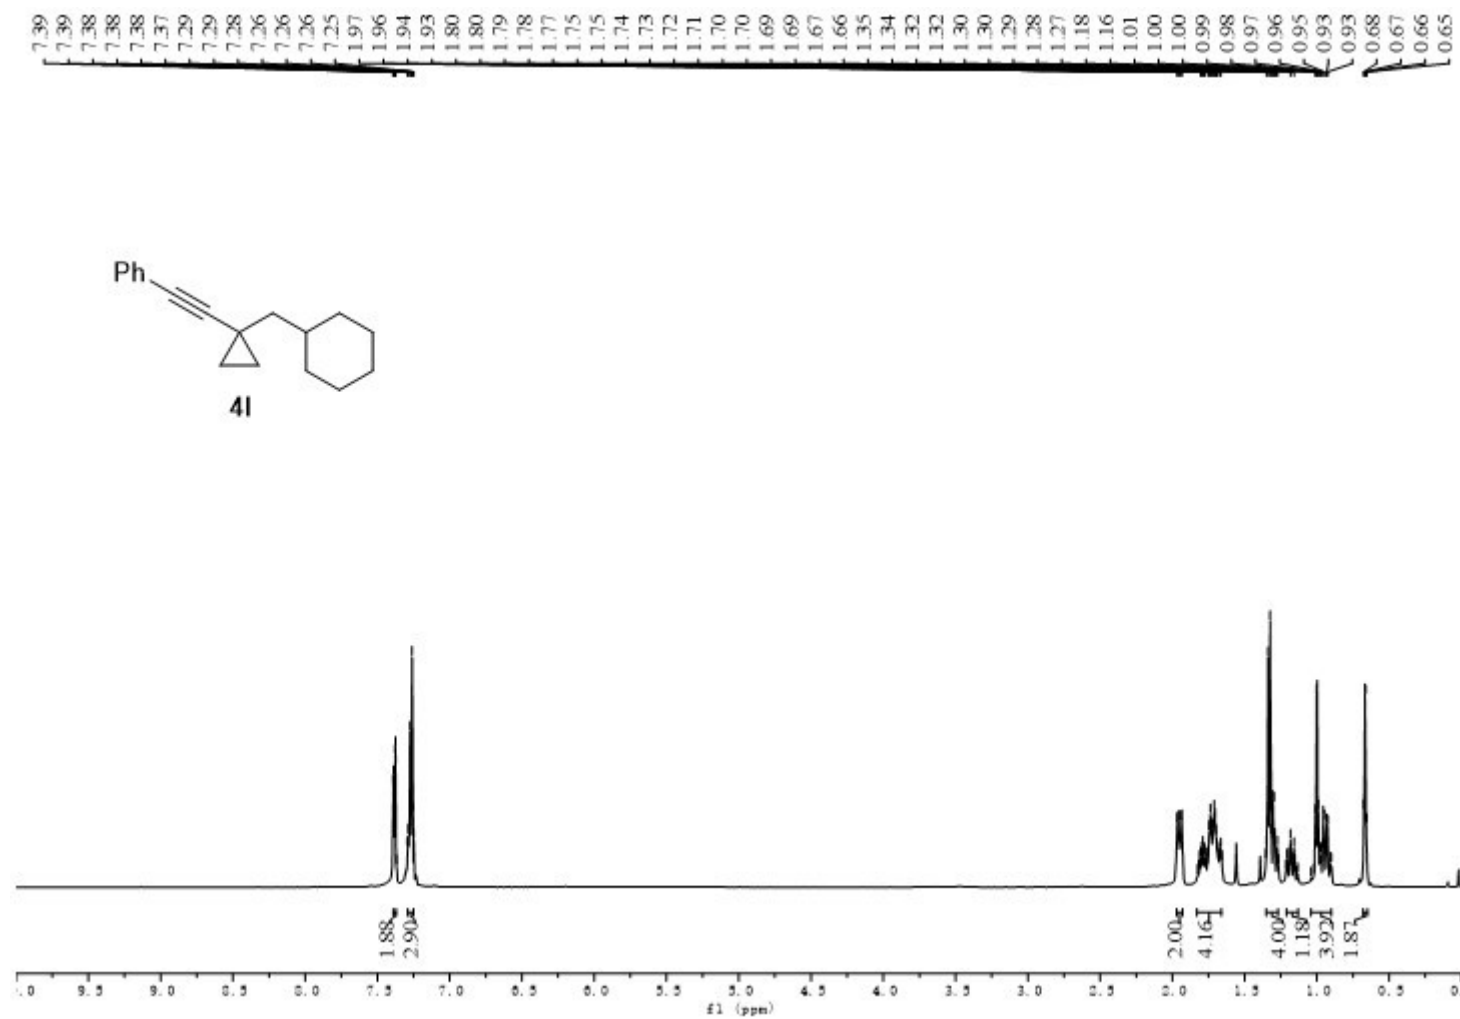

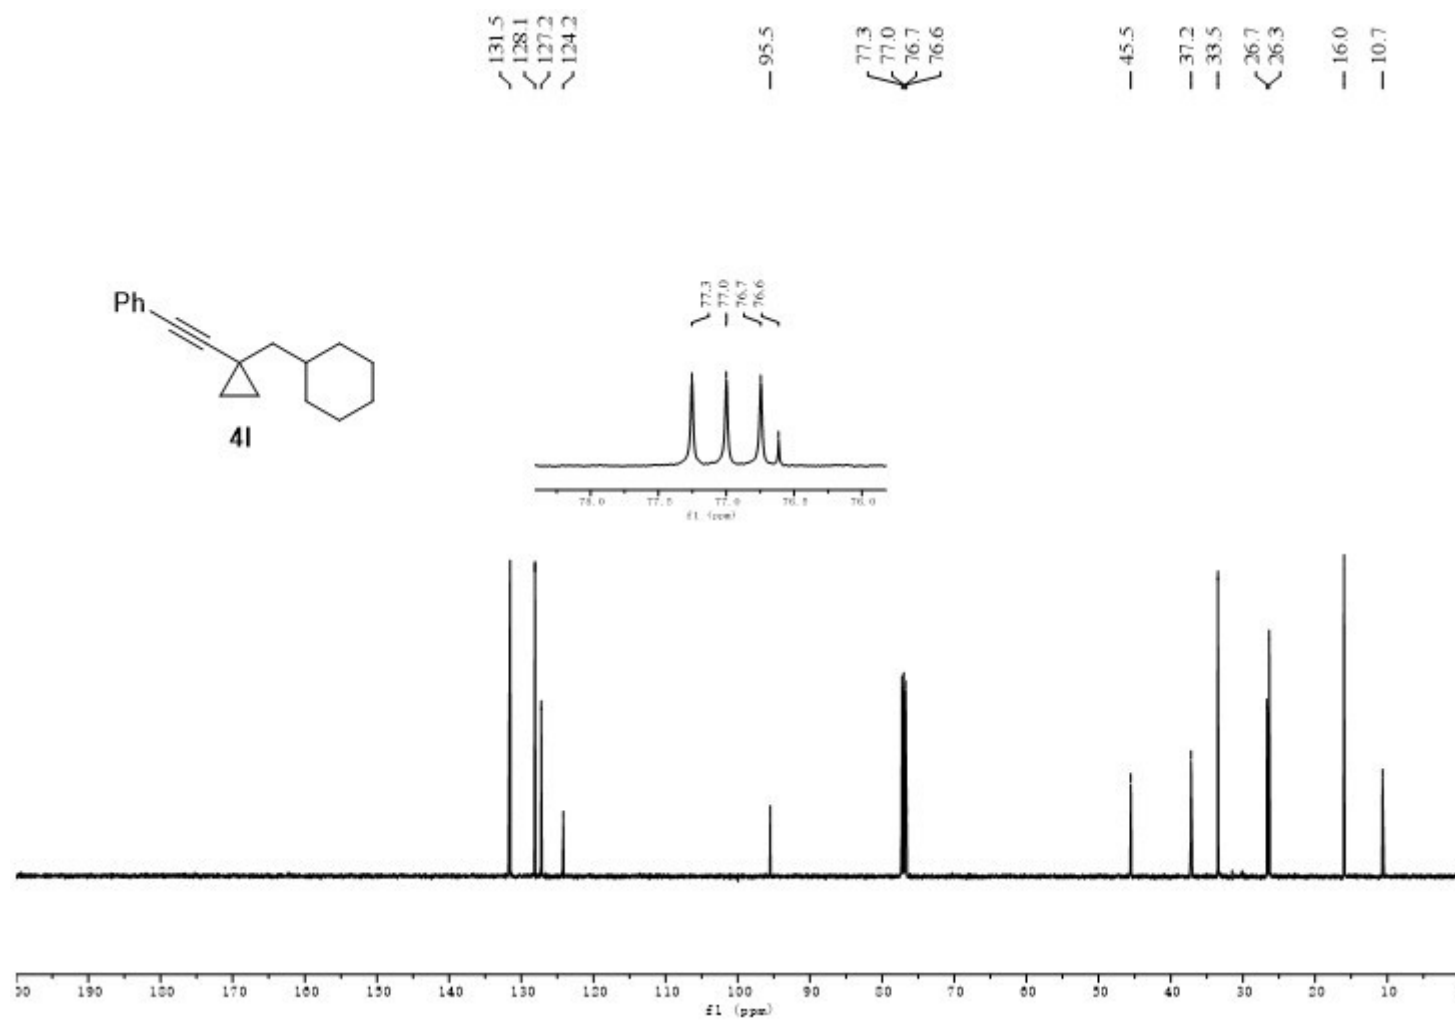

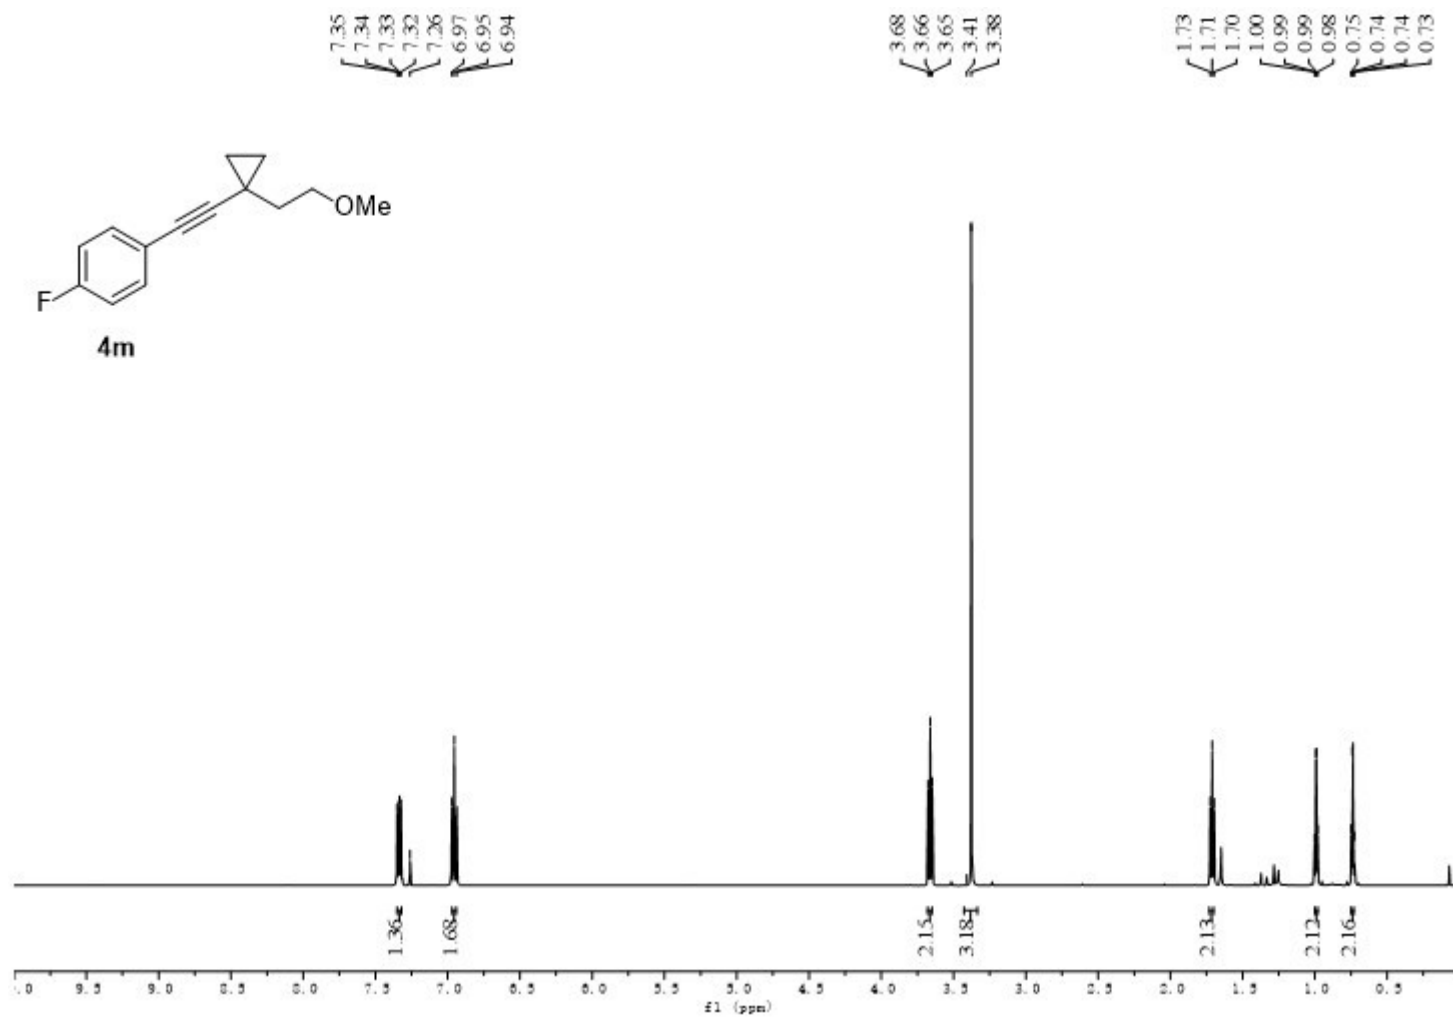

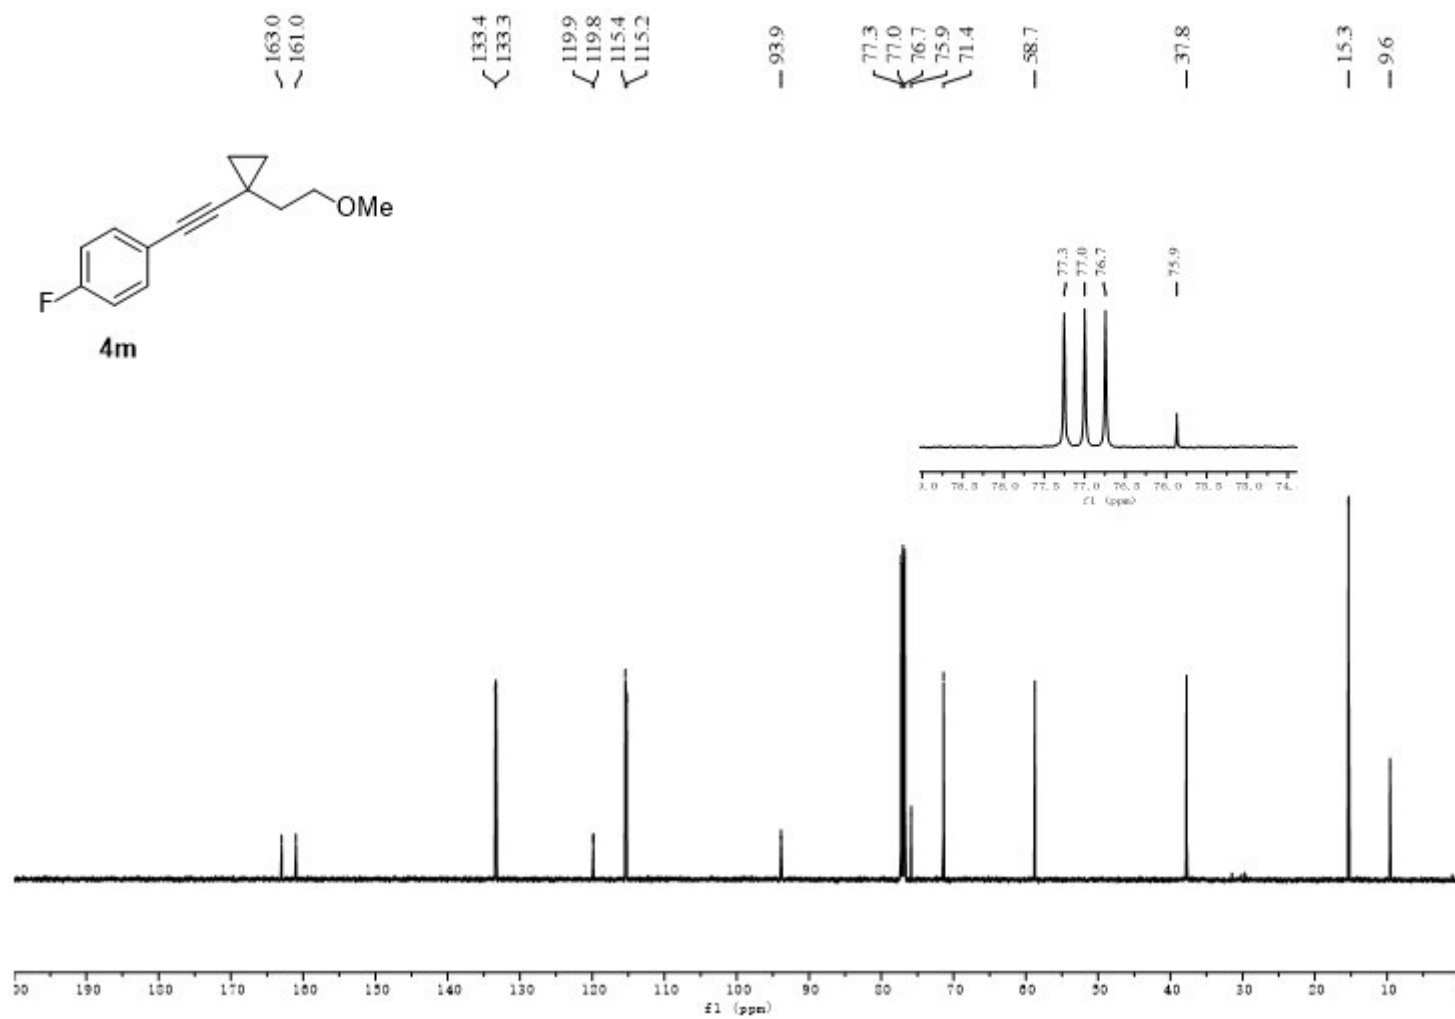

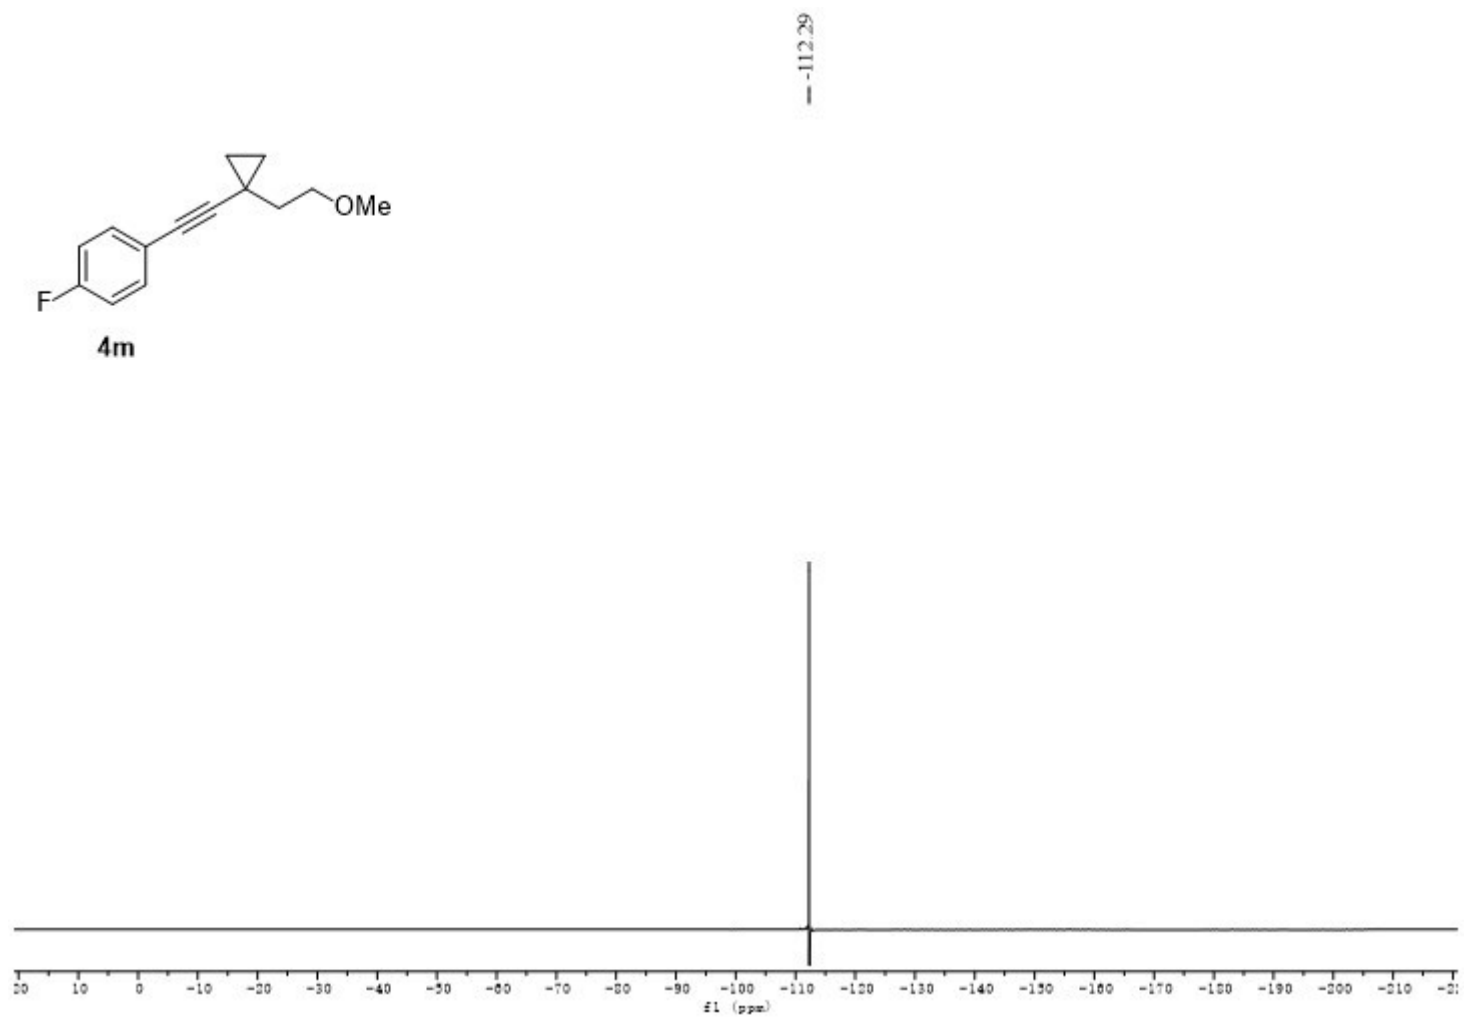

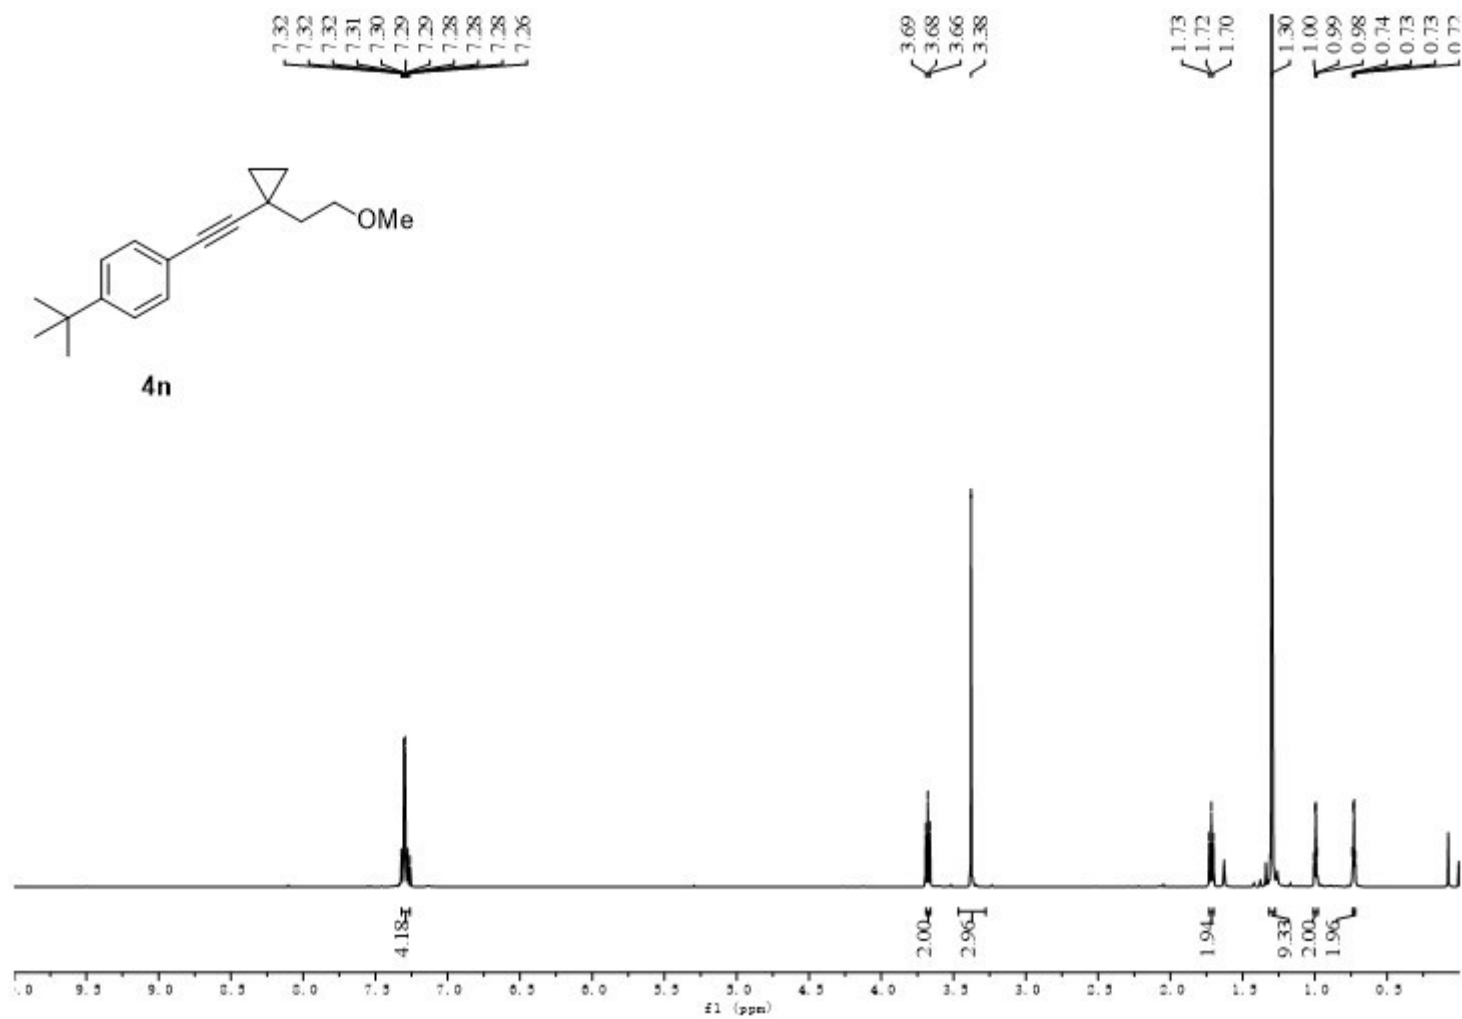

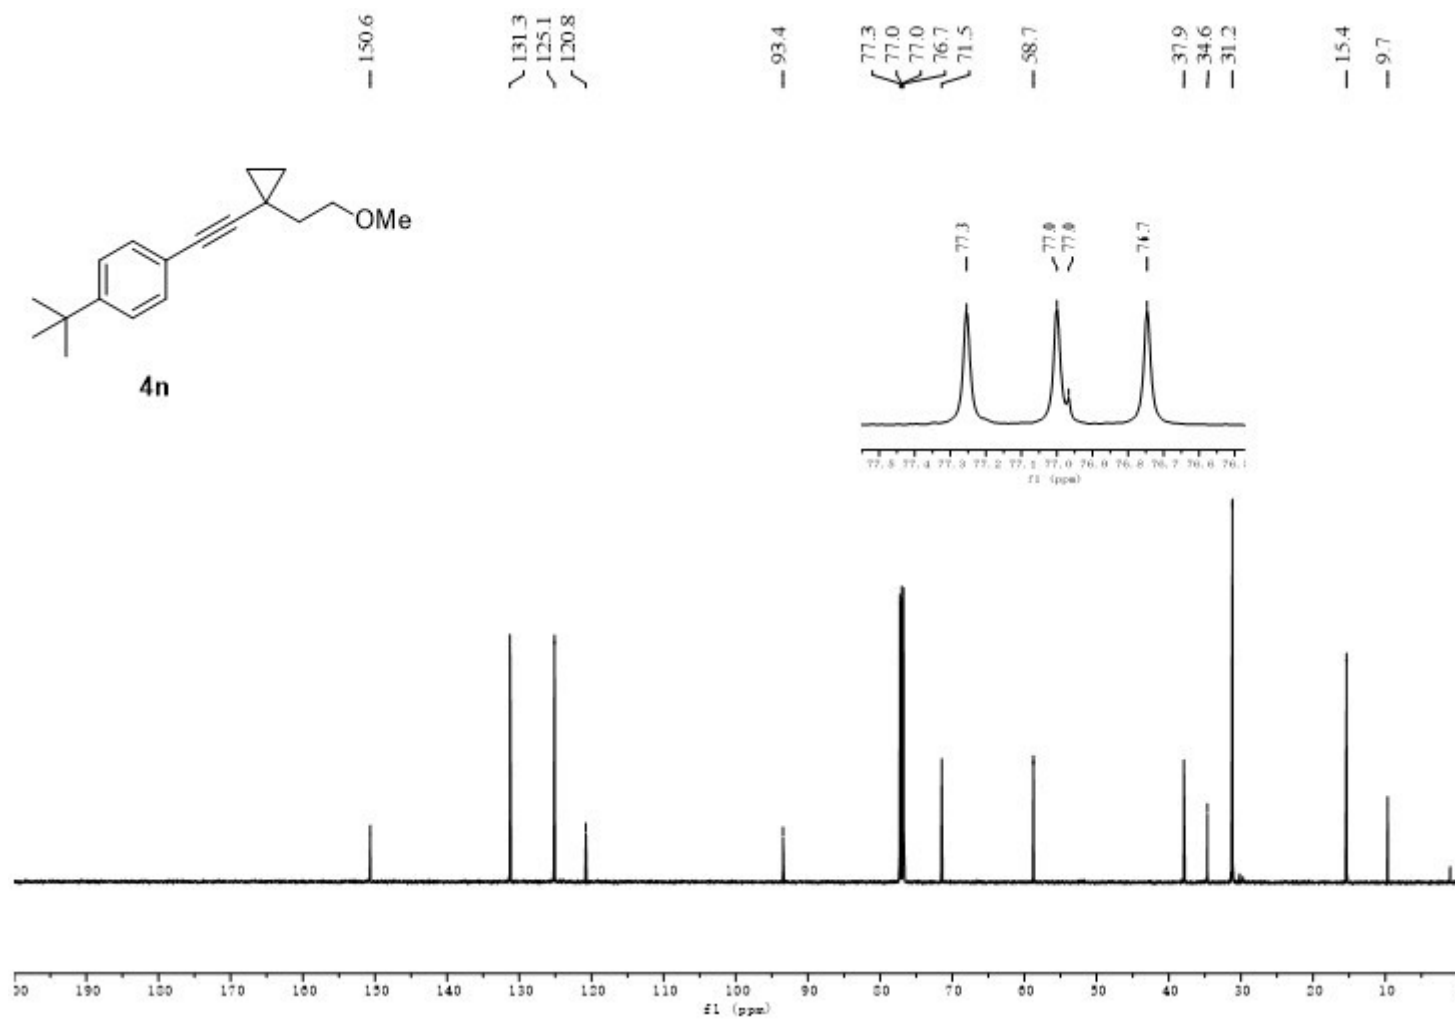

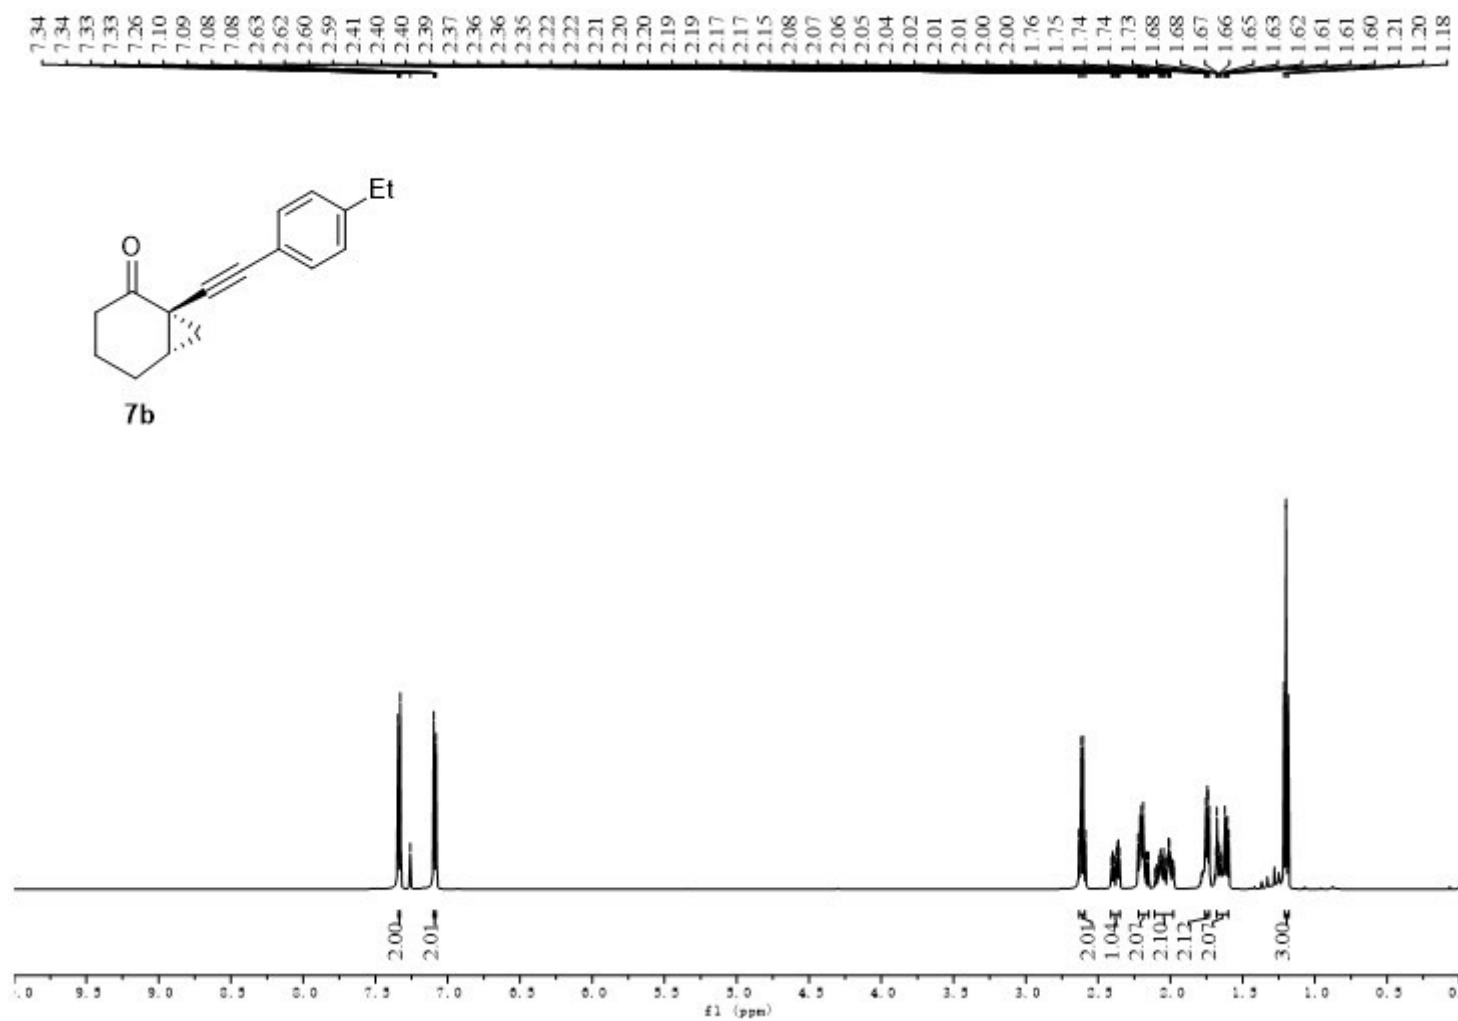

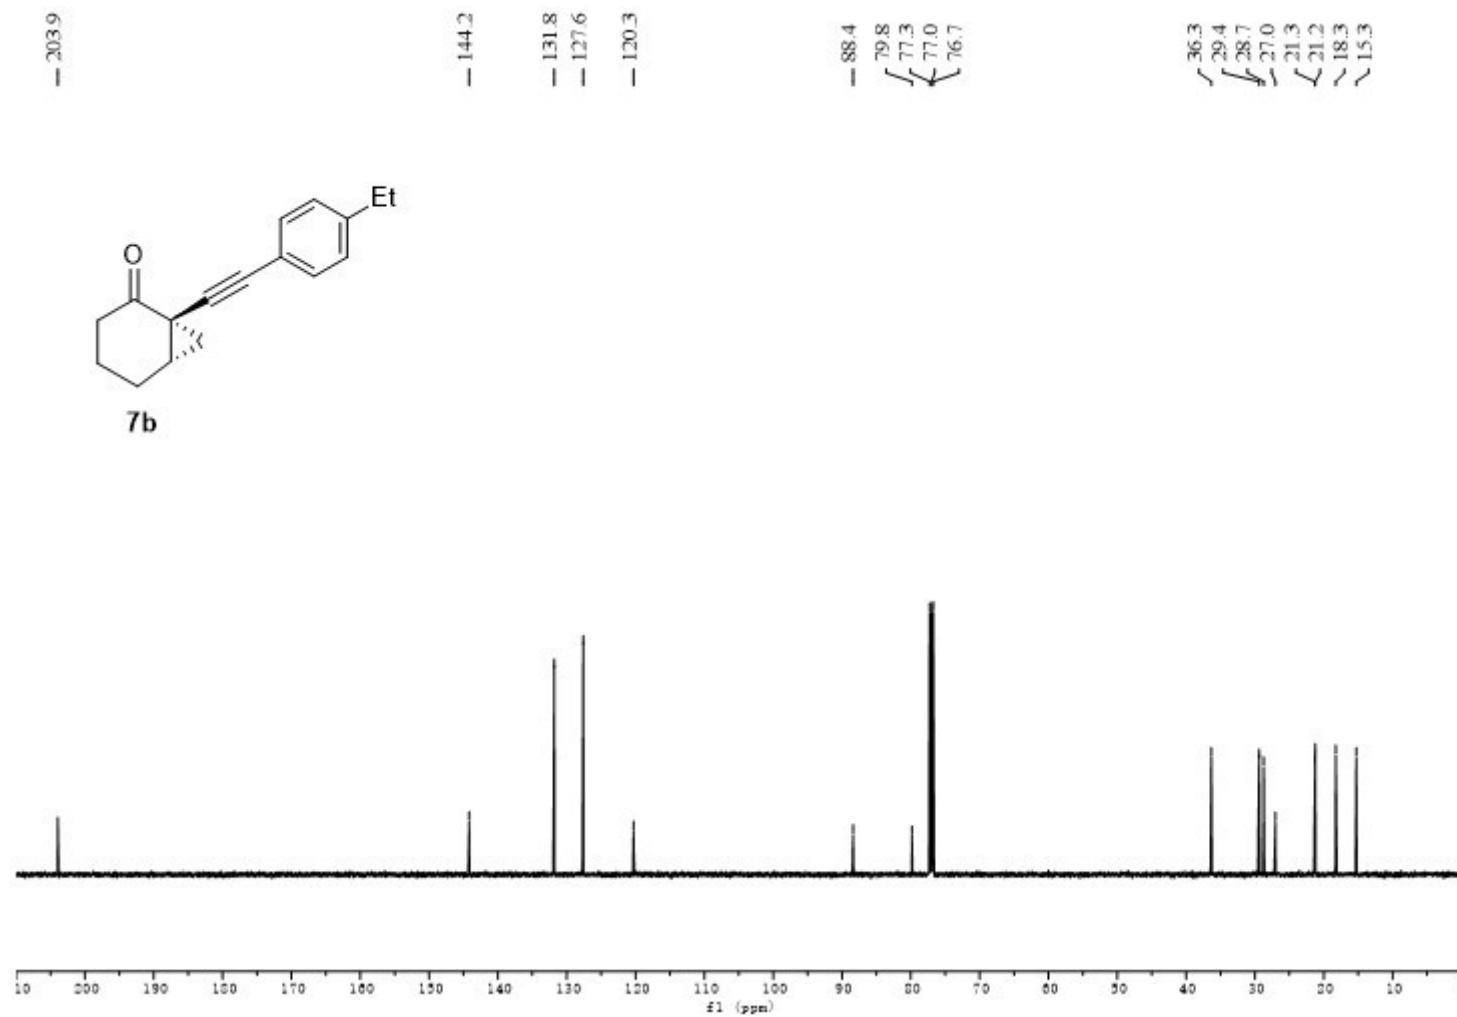

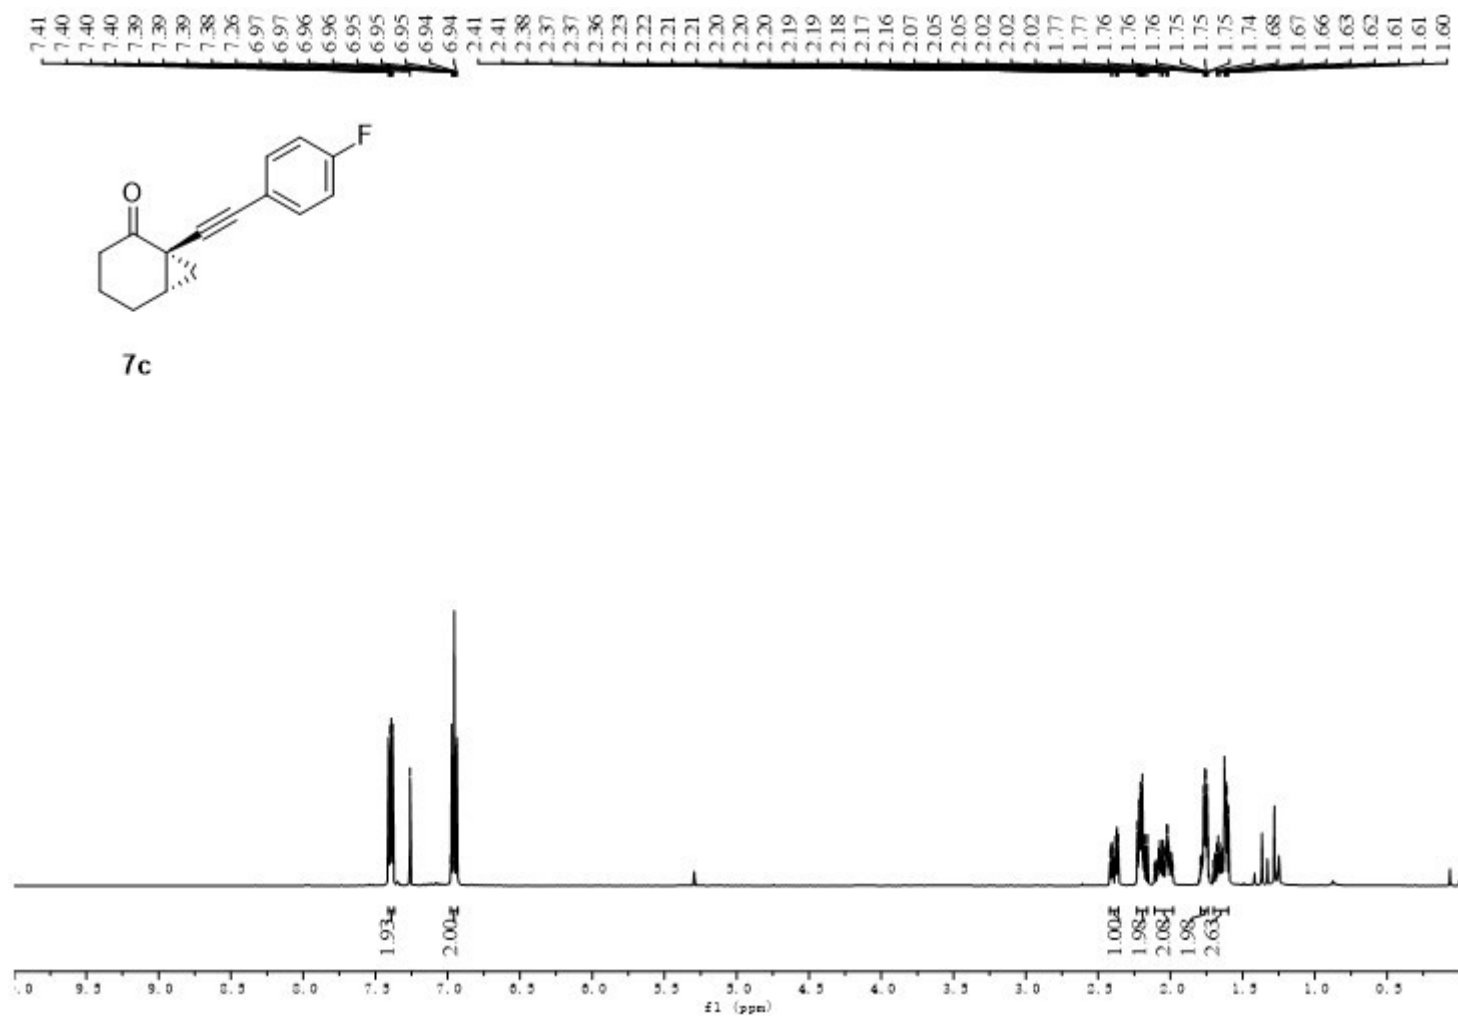

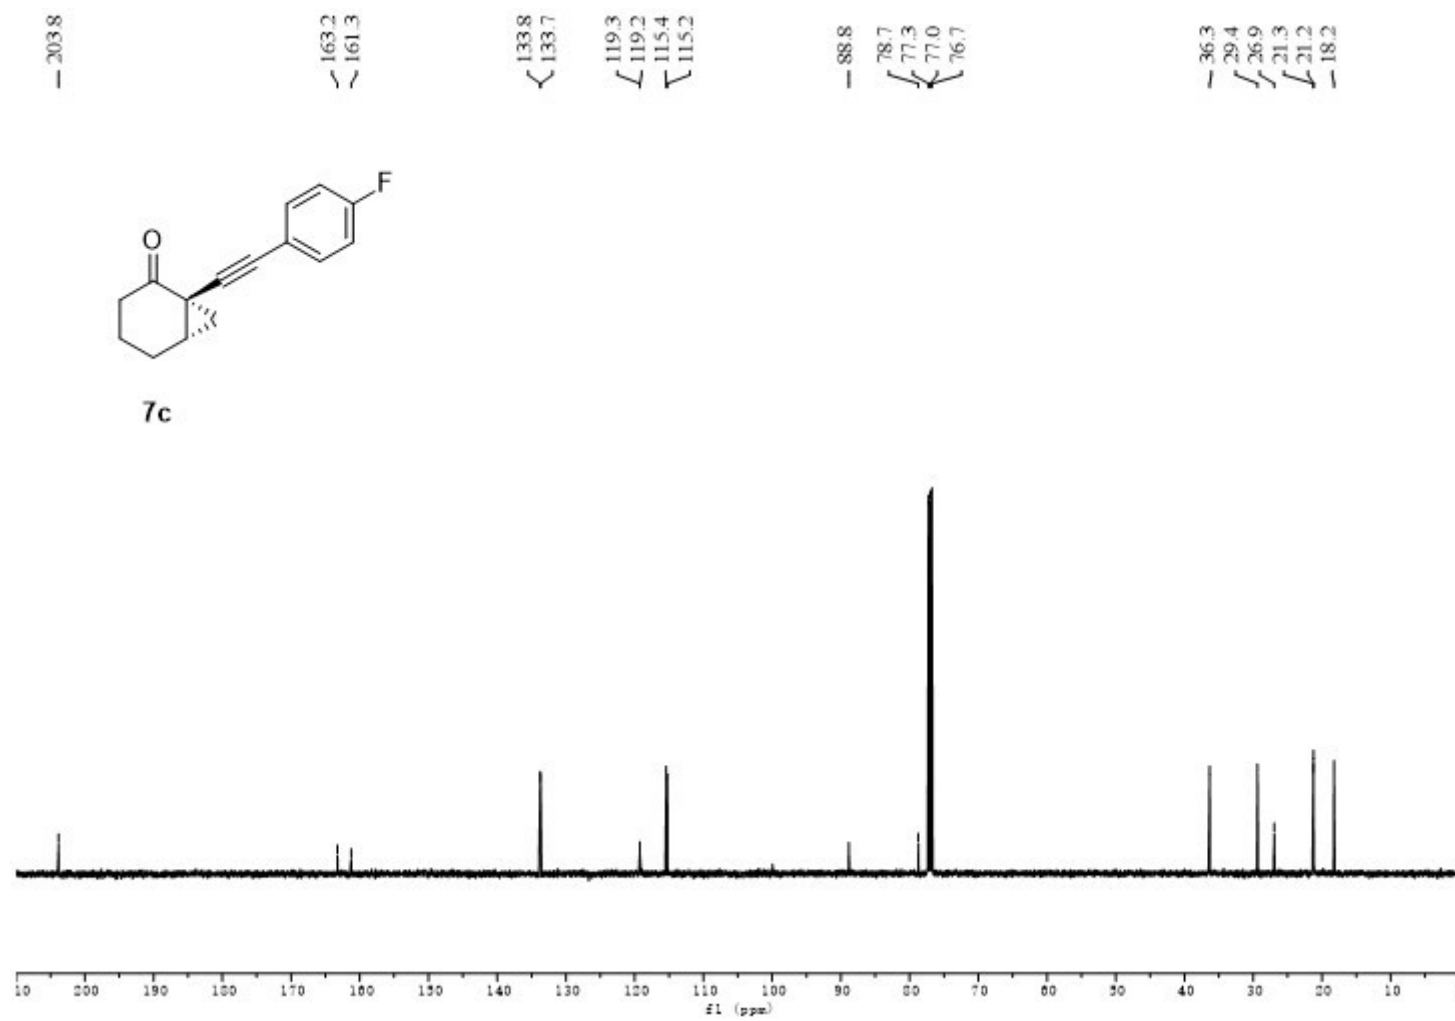

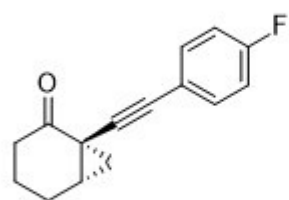

**7c**

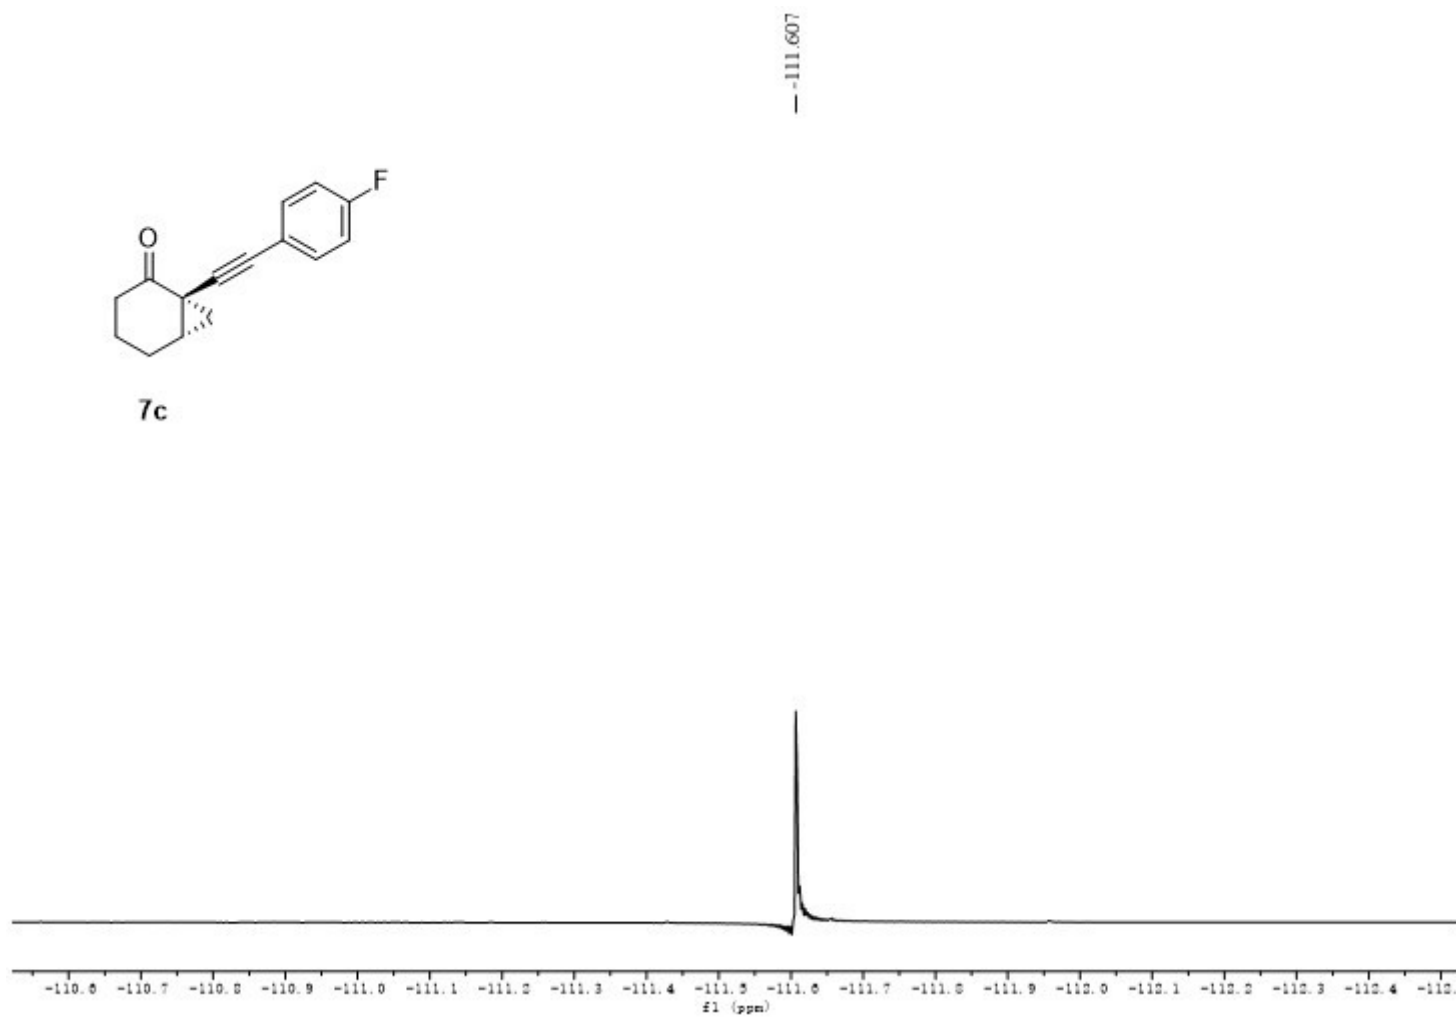

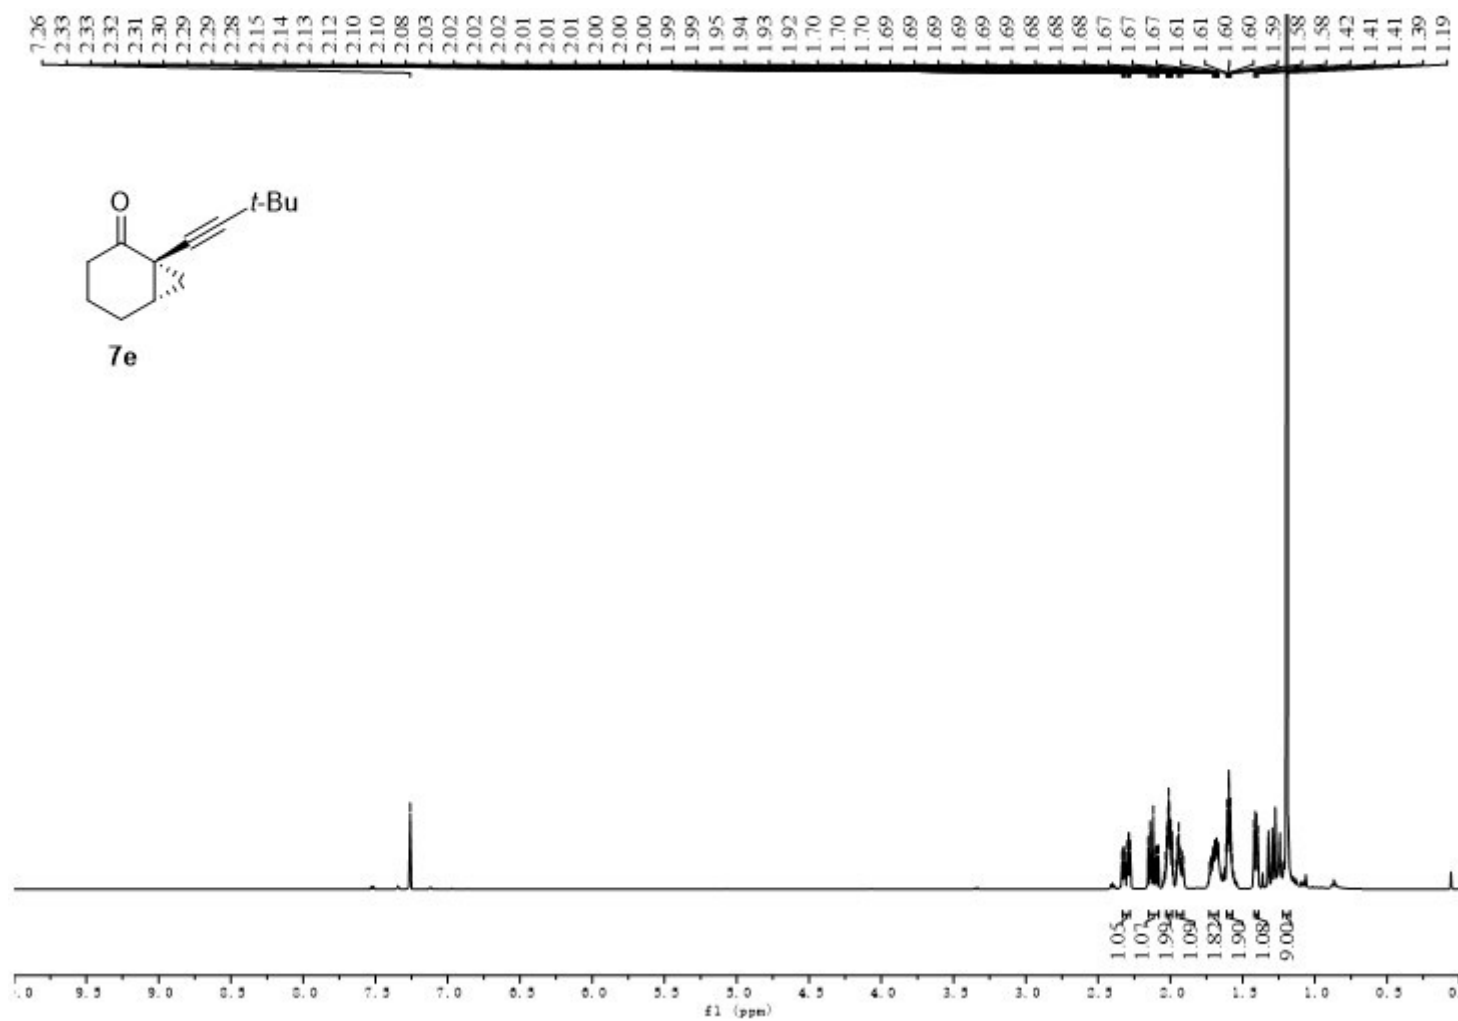

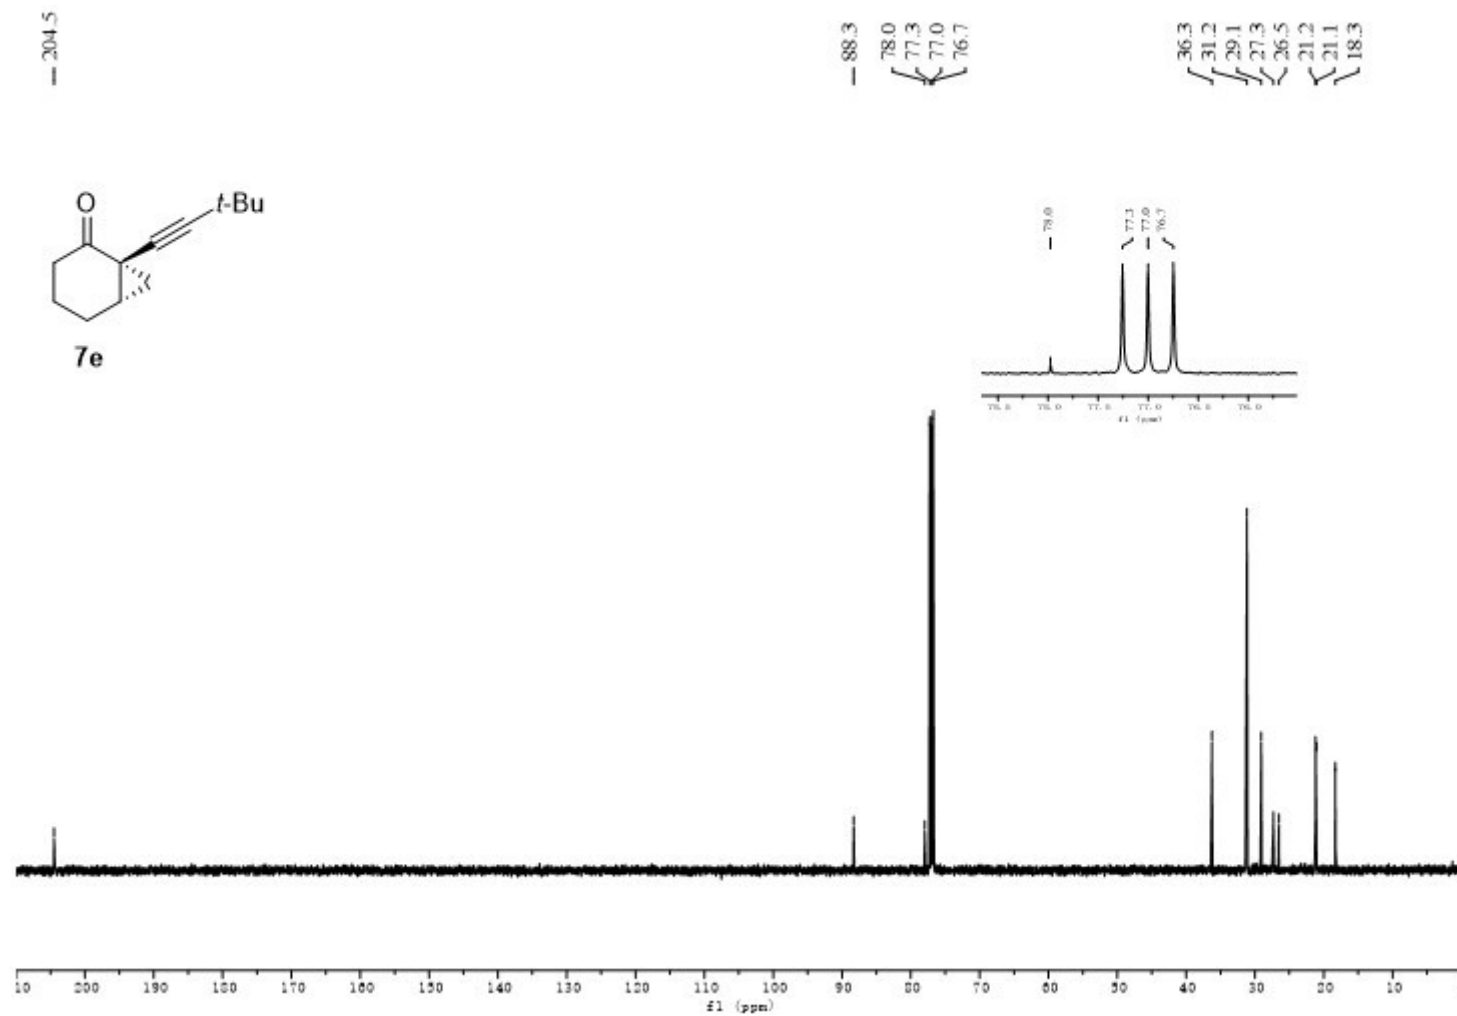

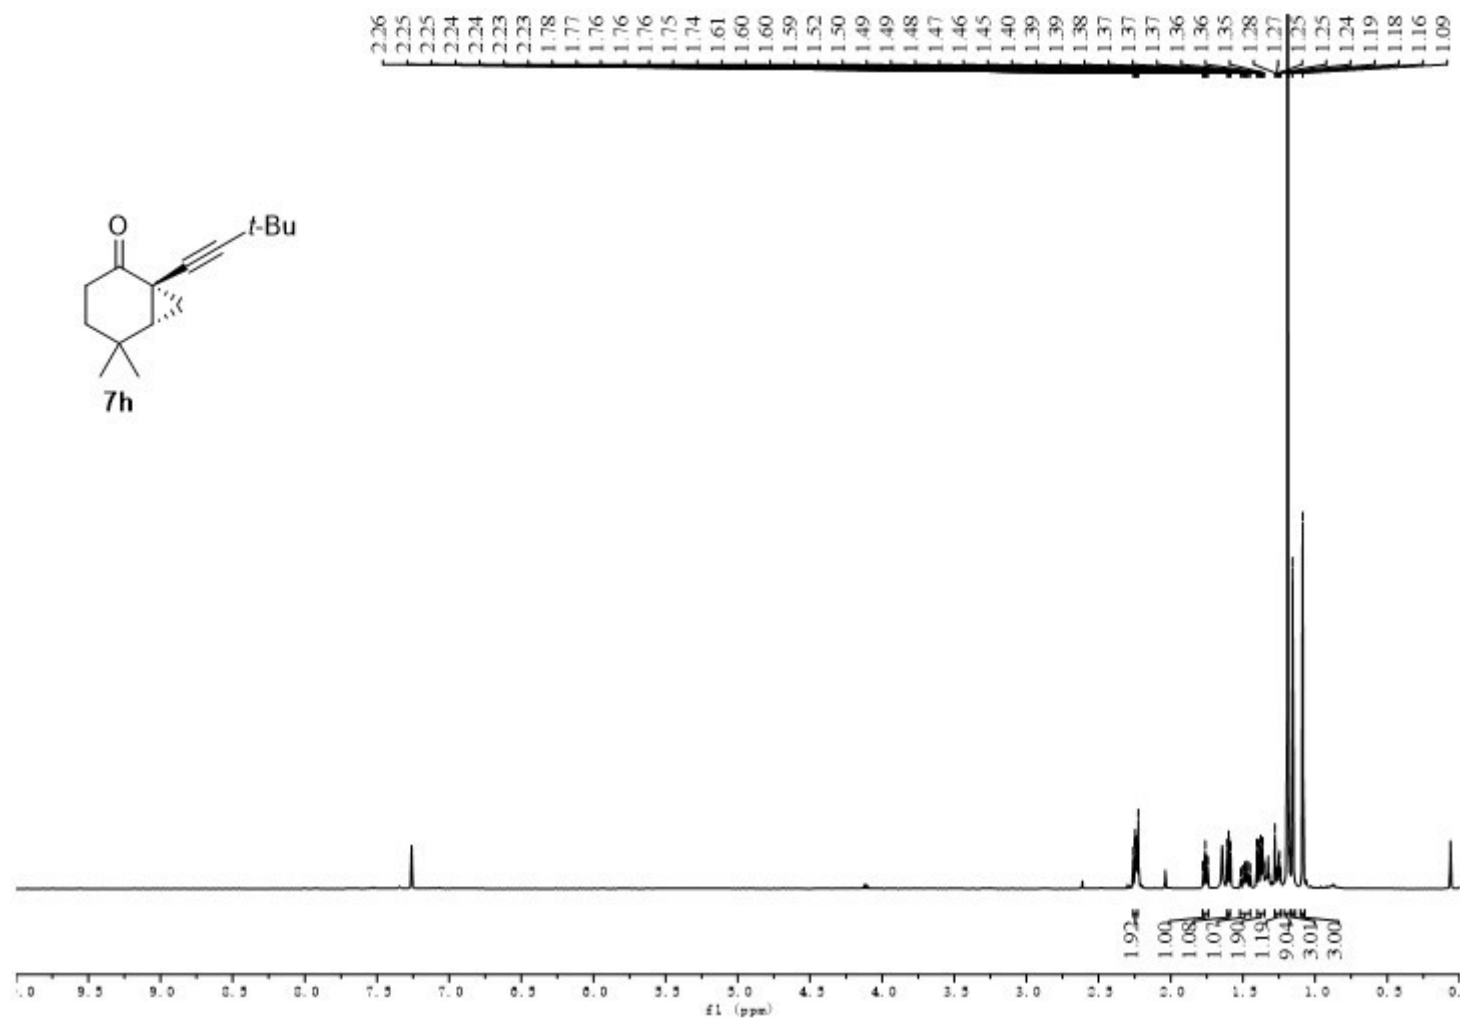

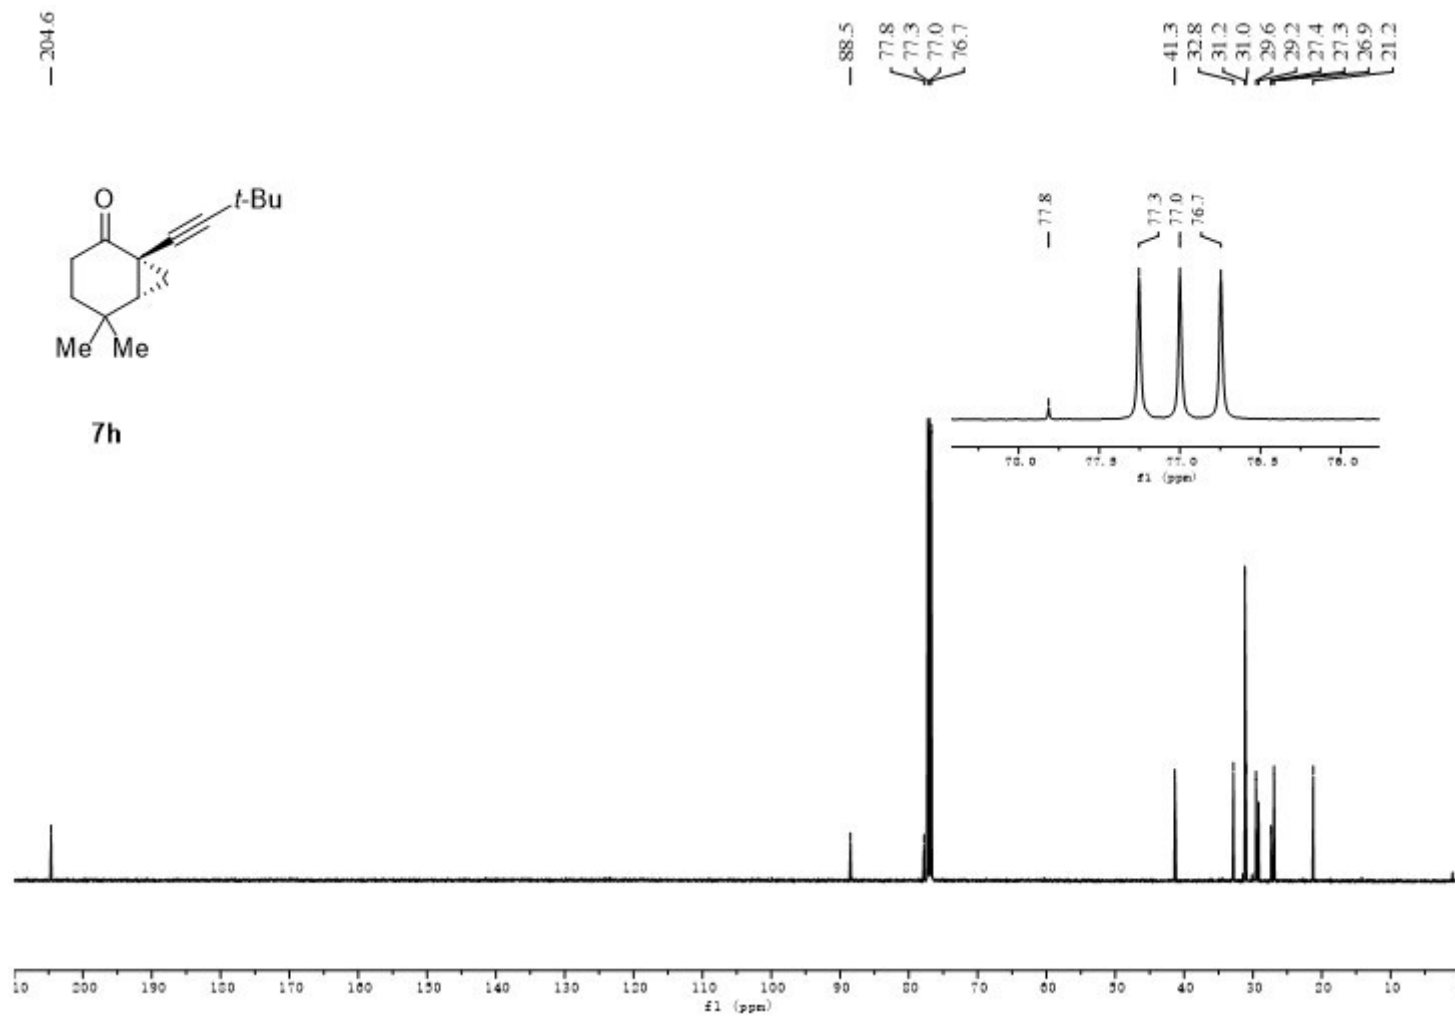

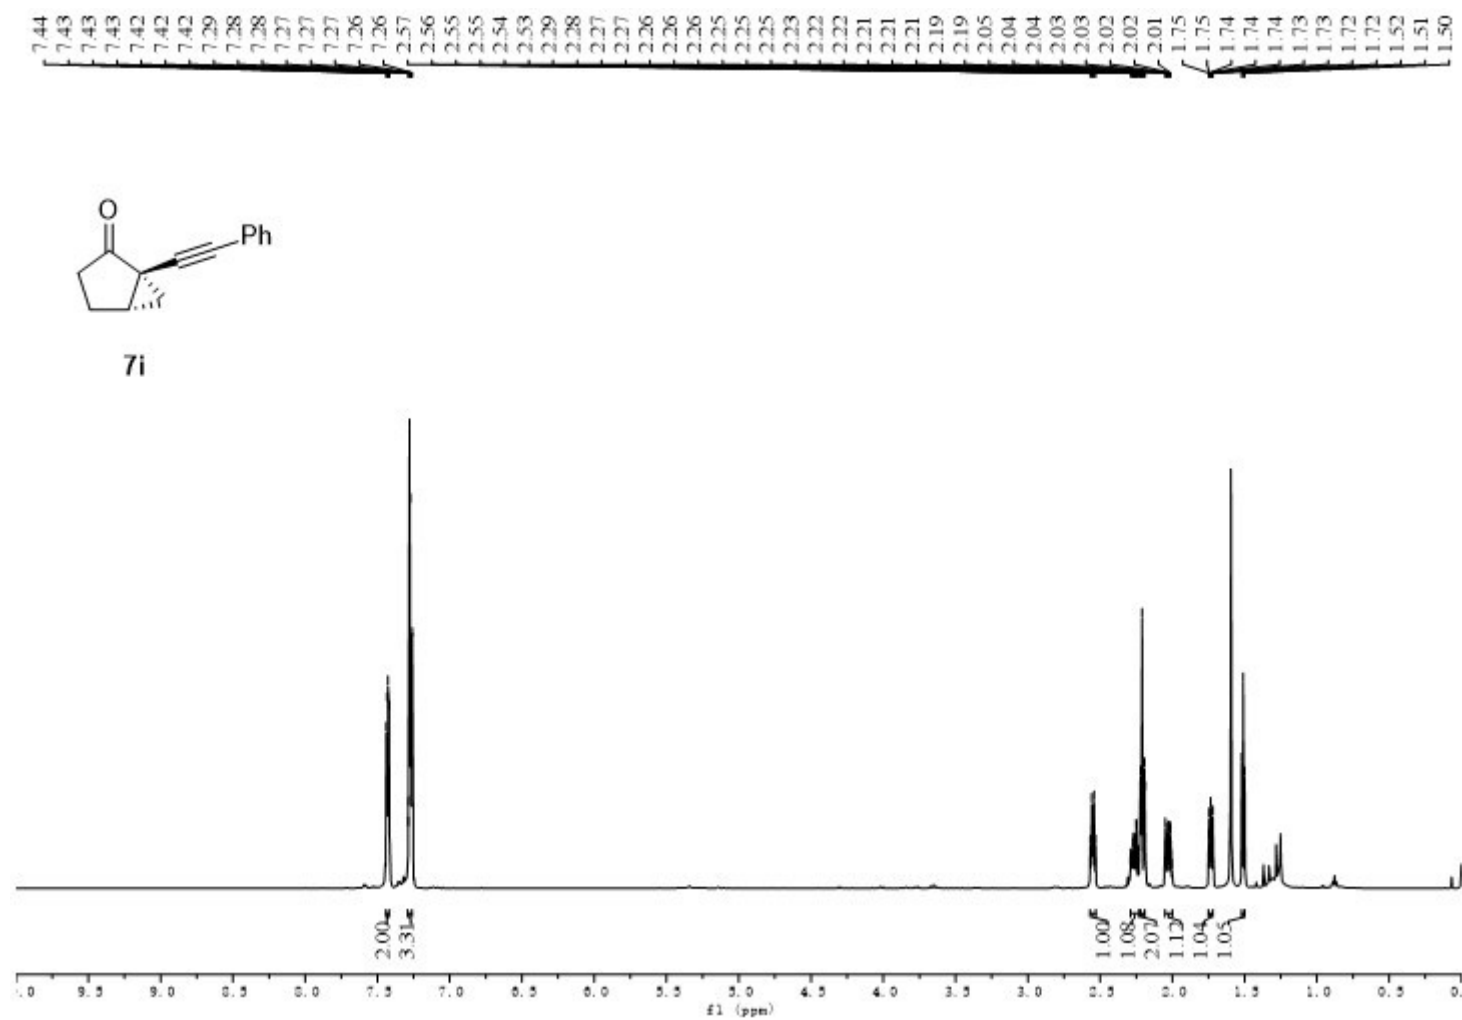

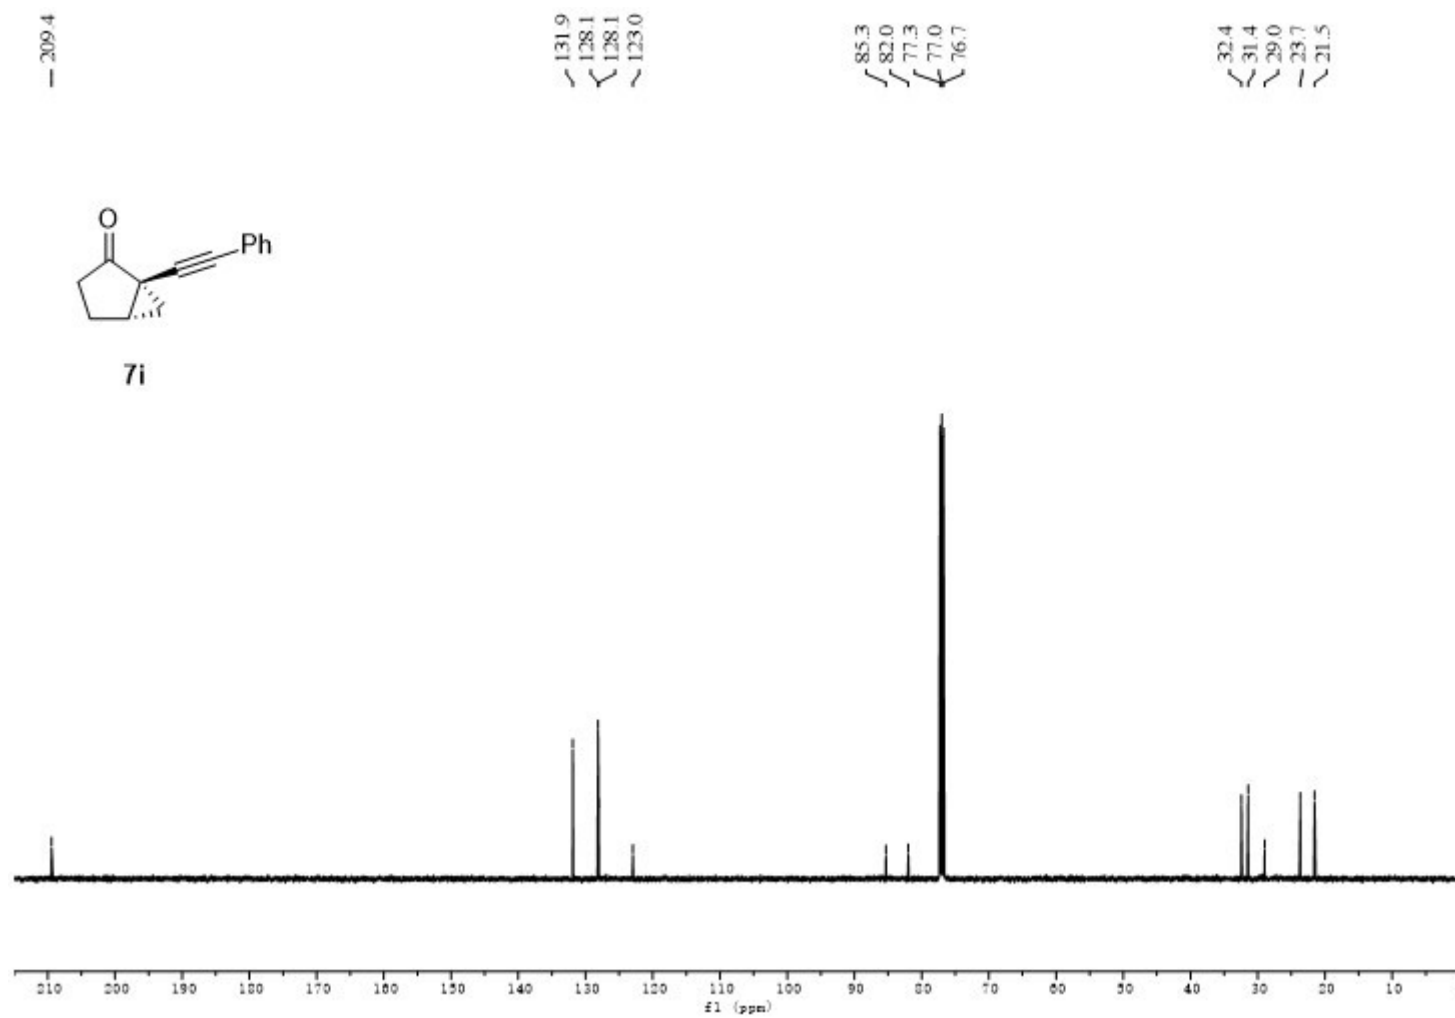

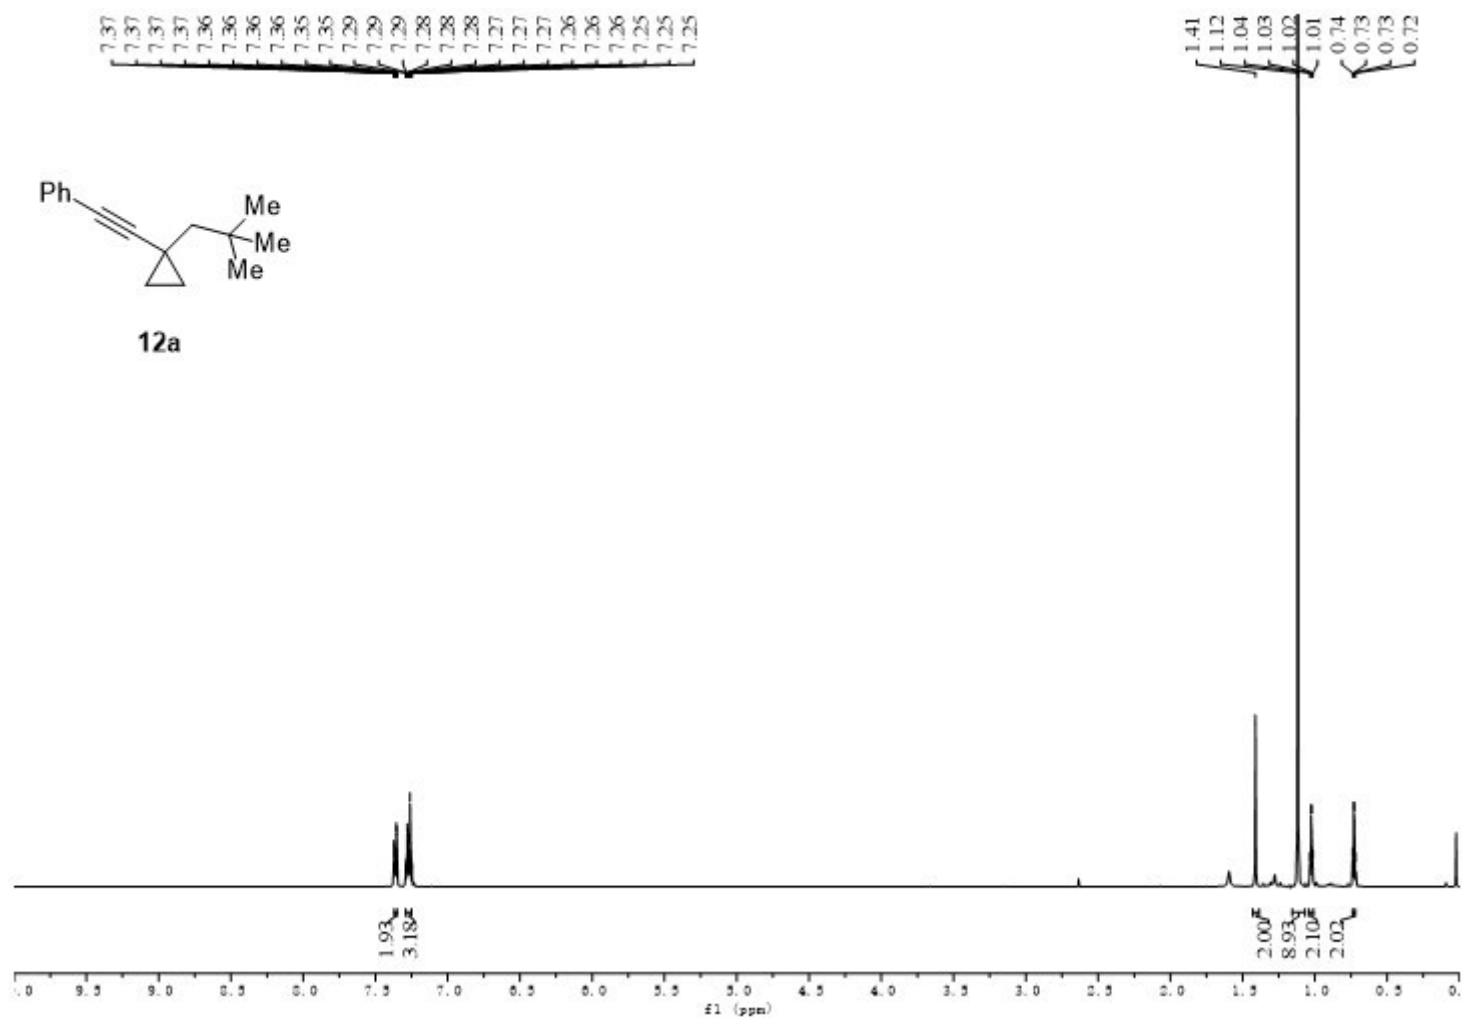

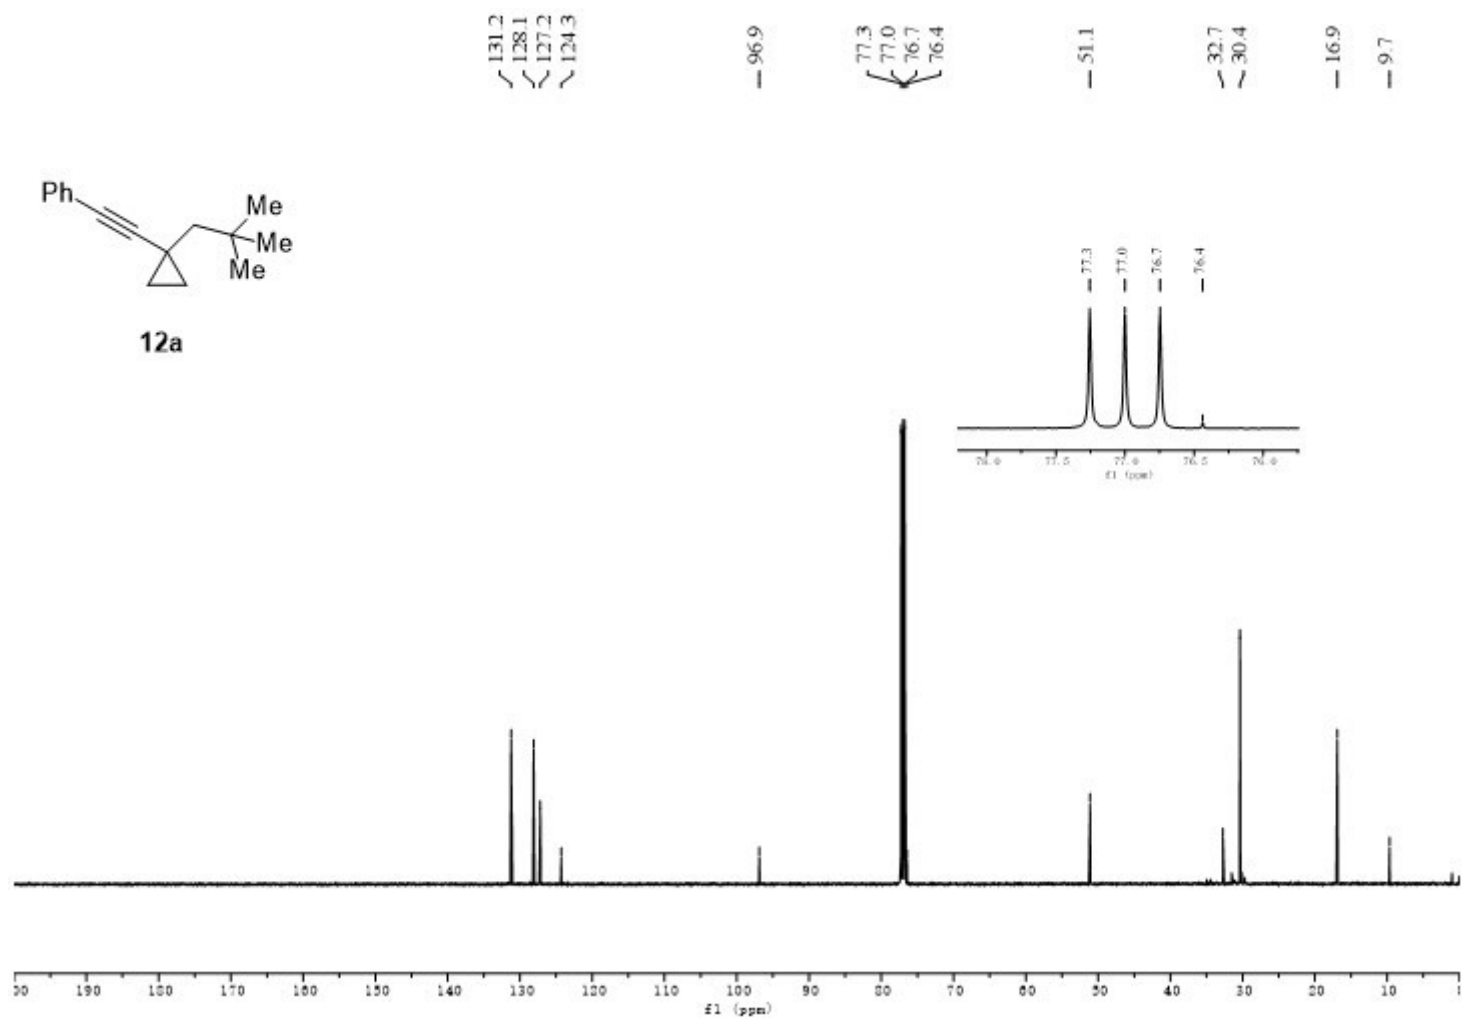

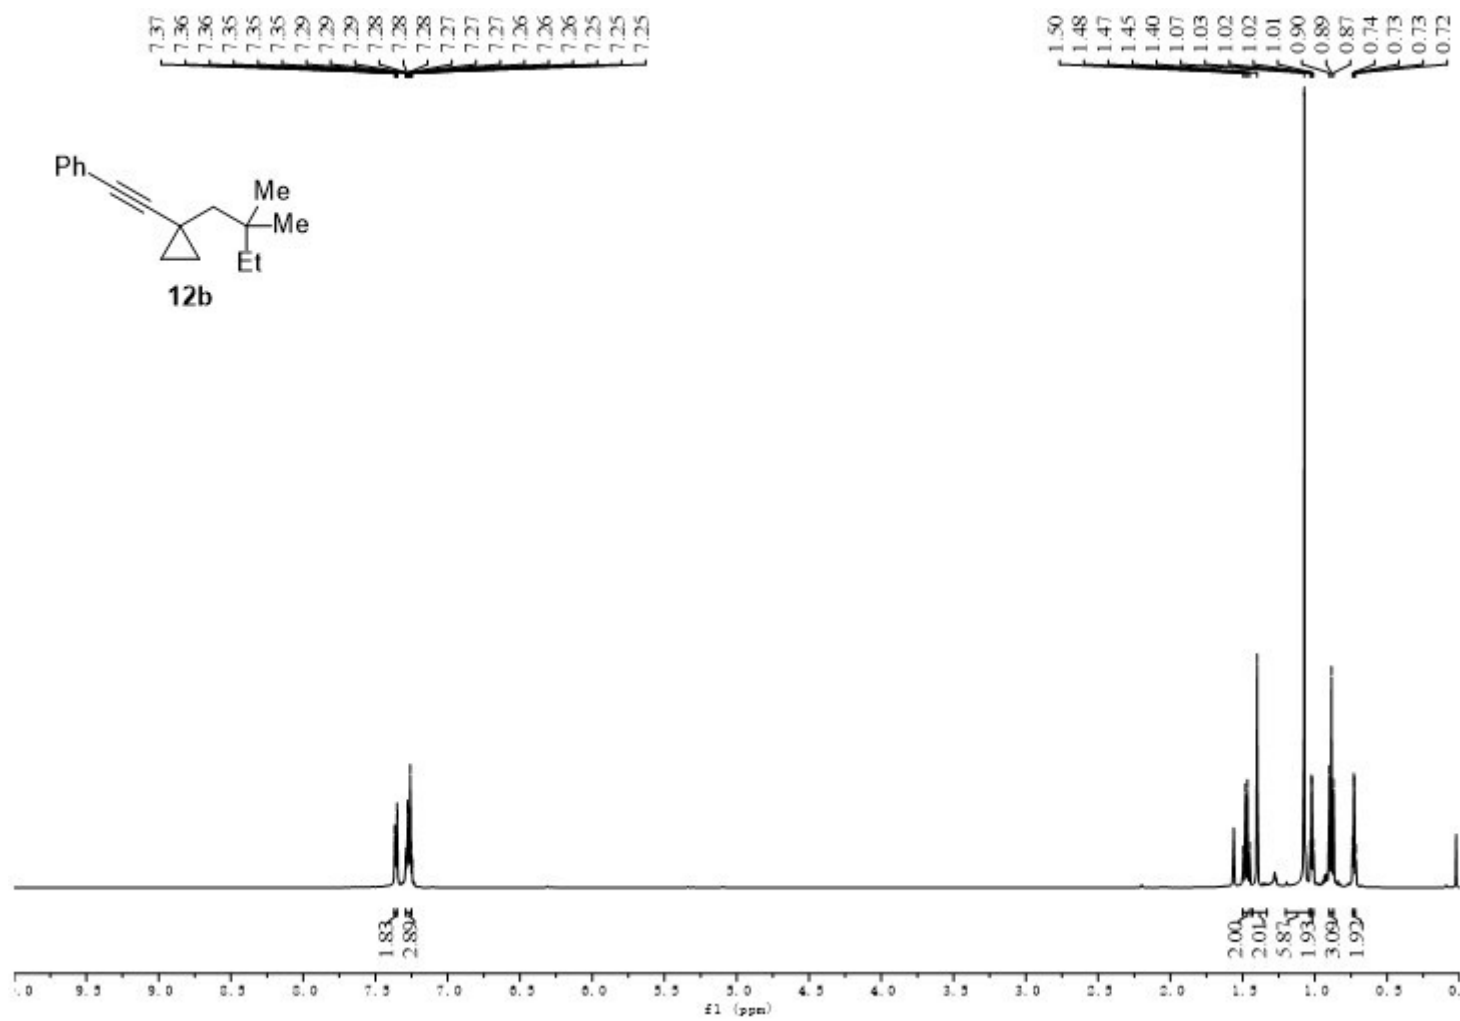

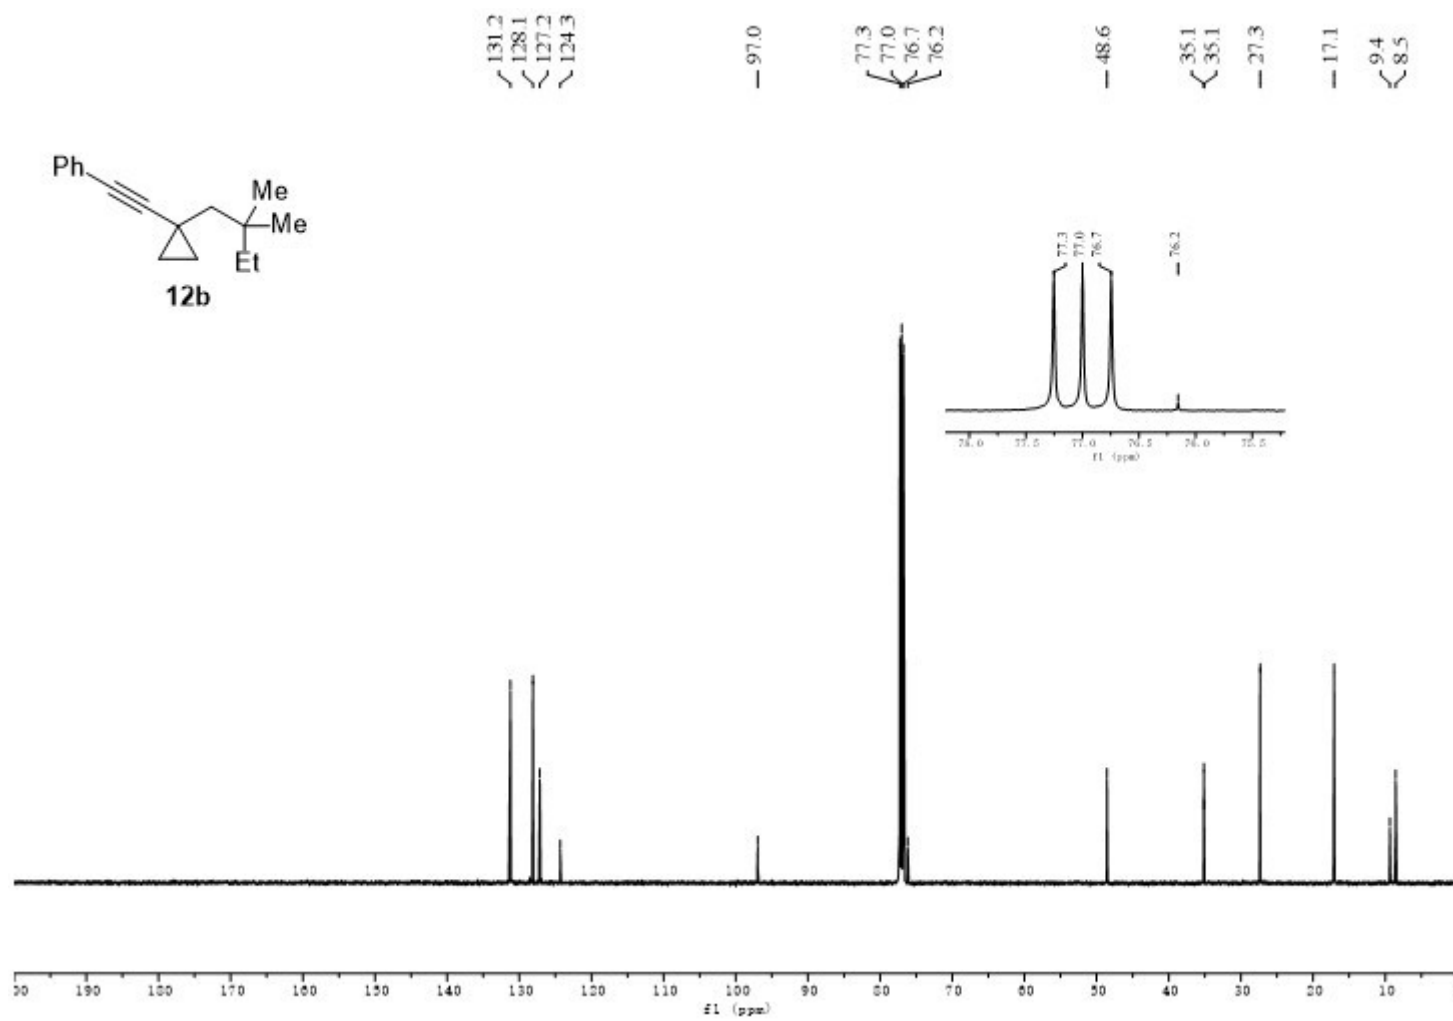

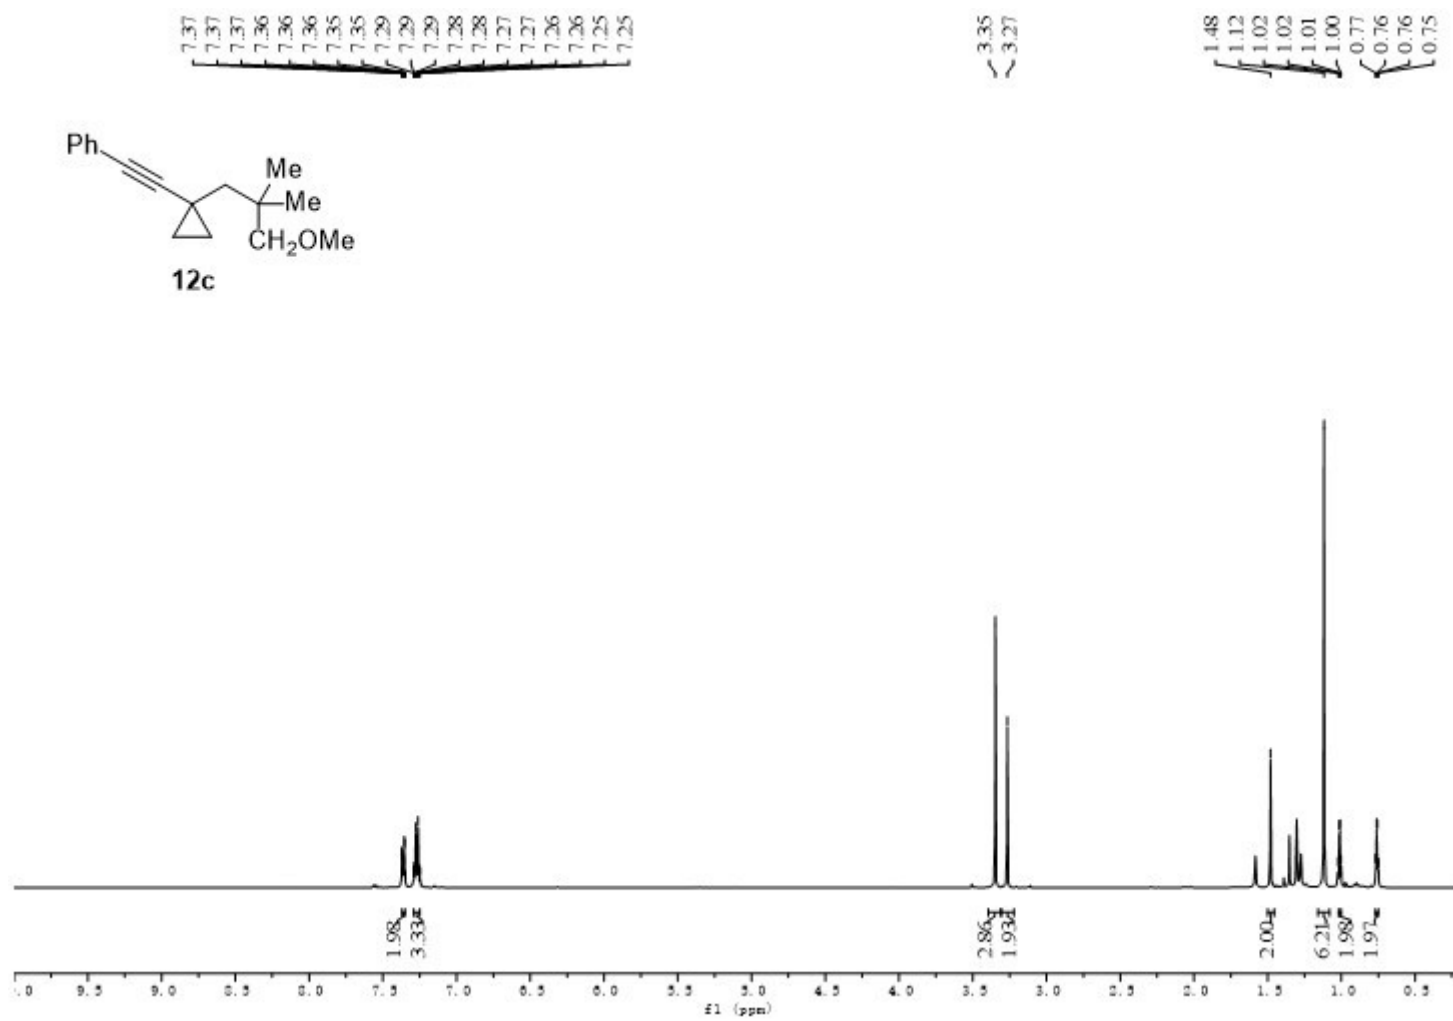

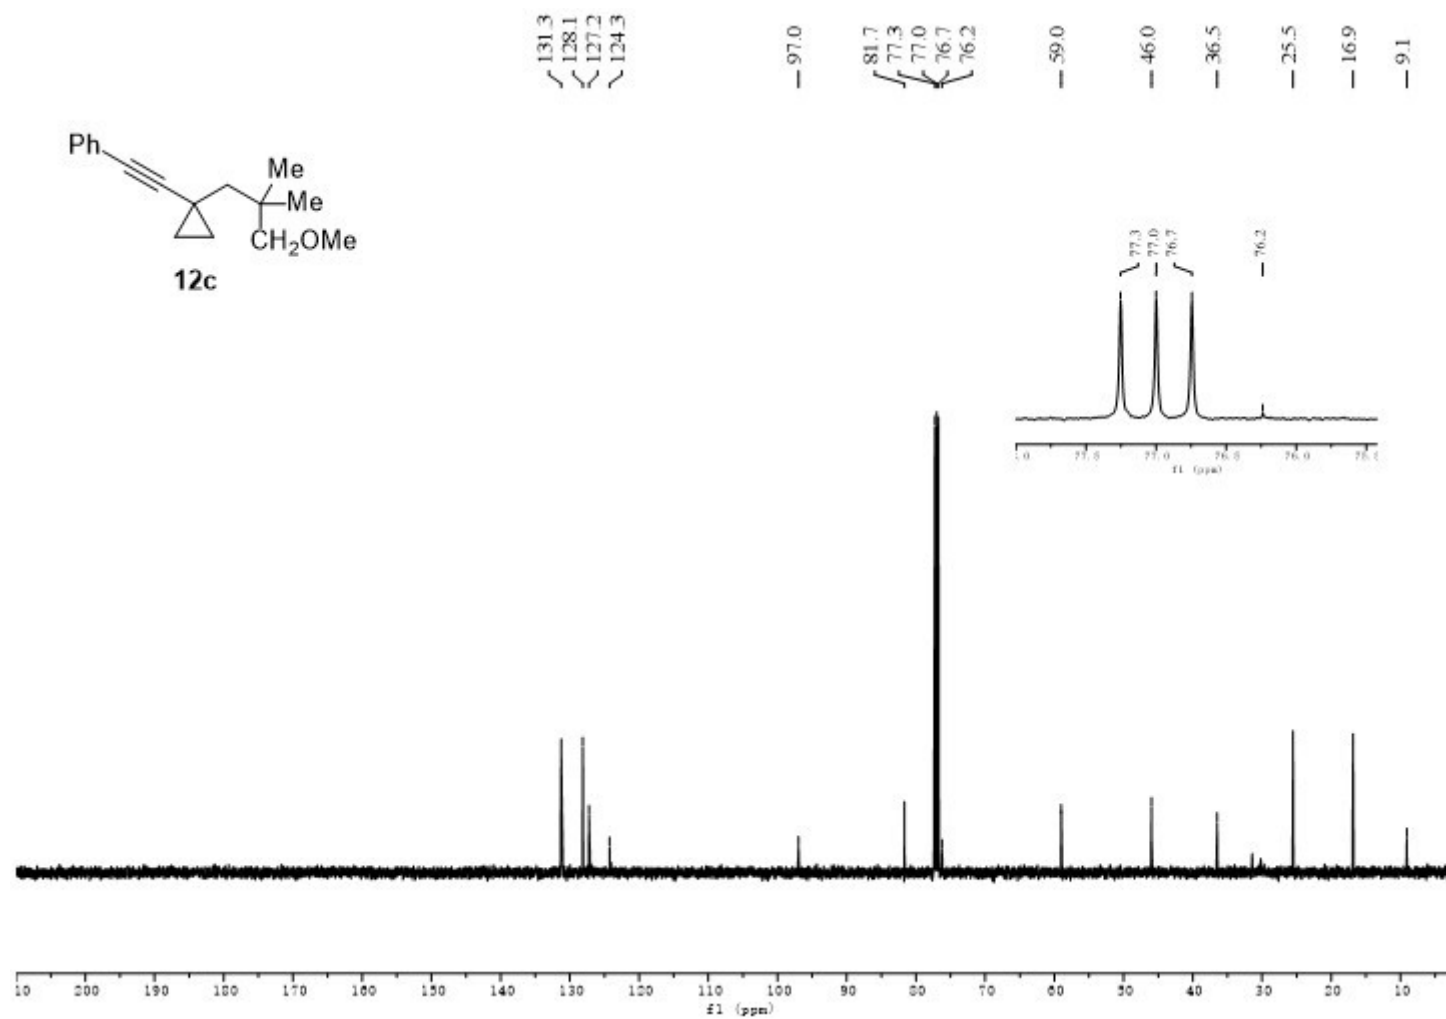

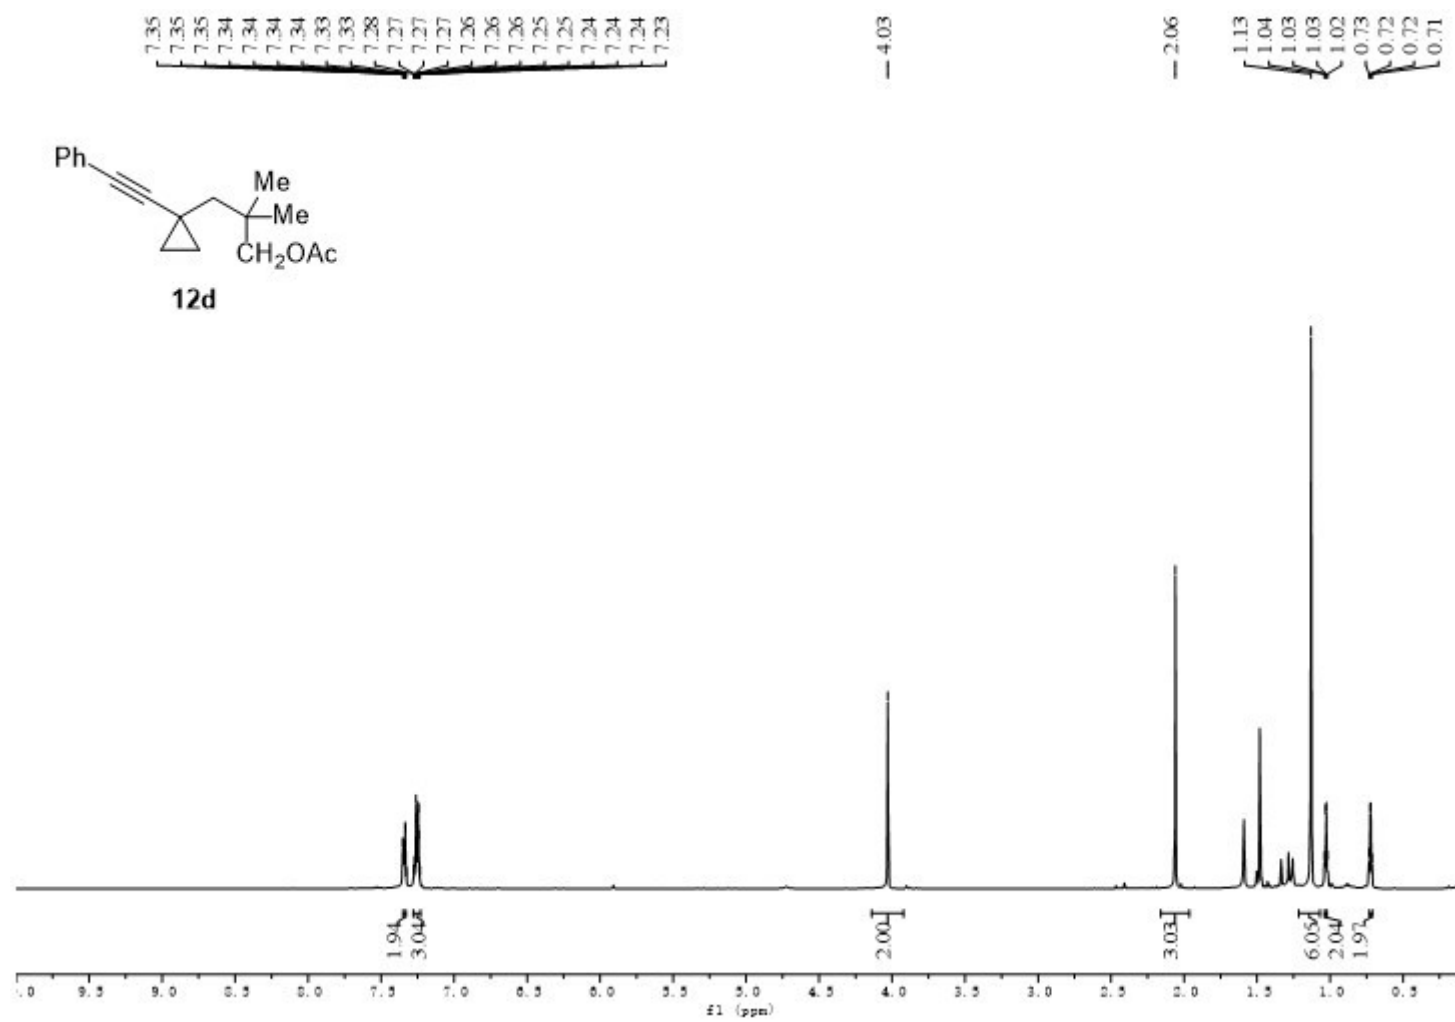

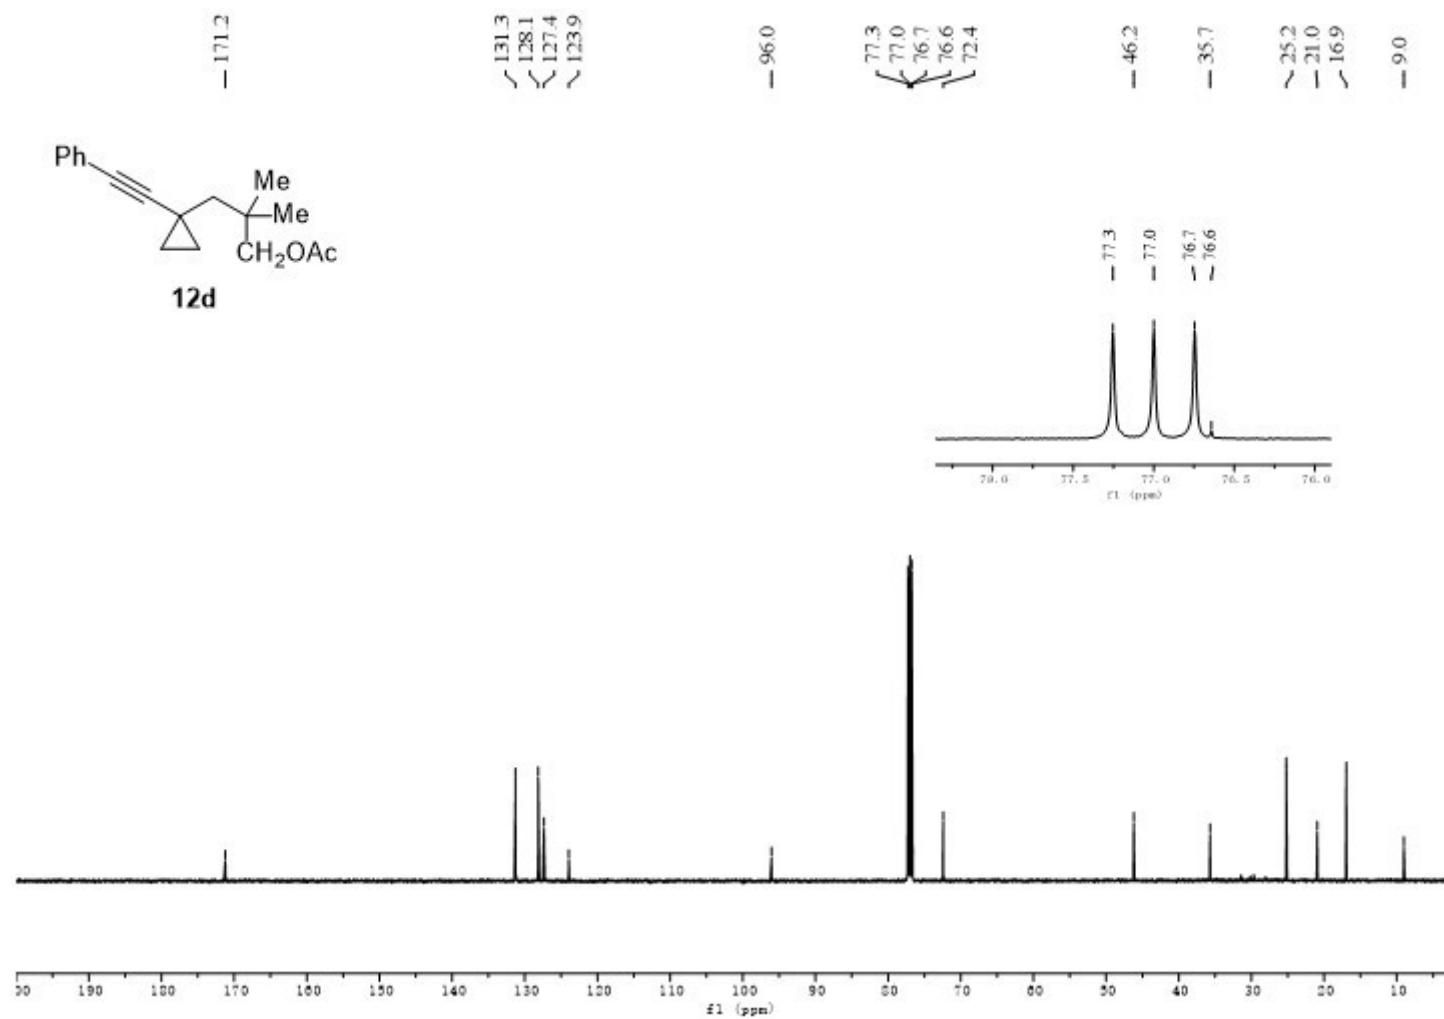

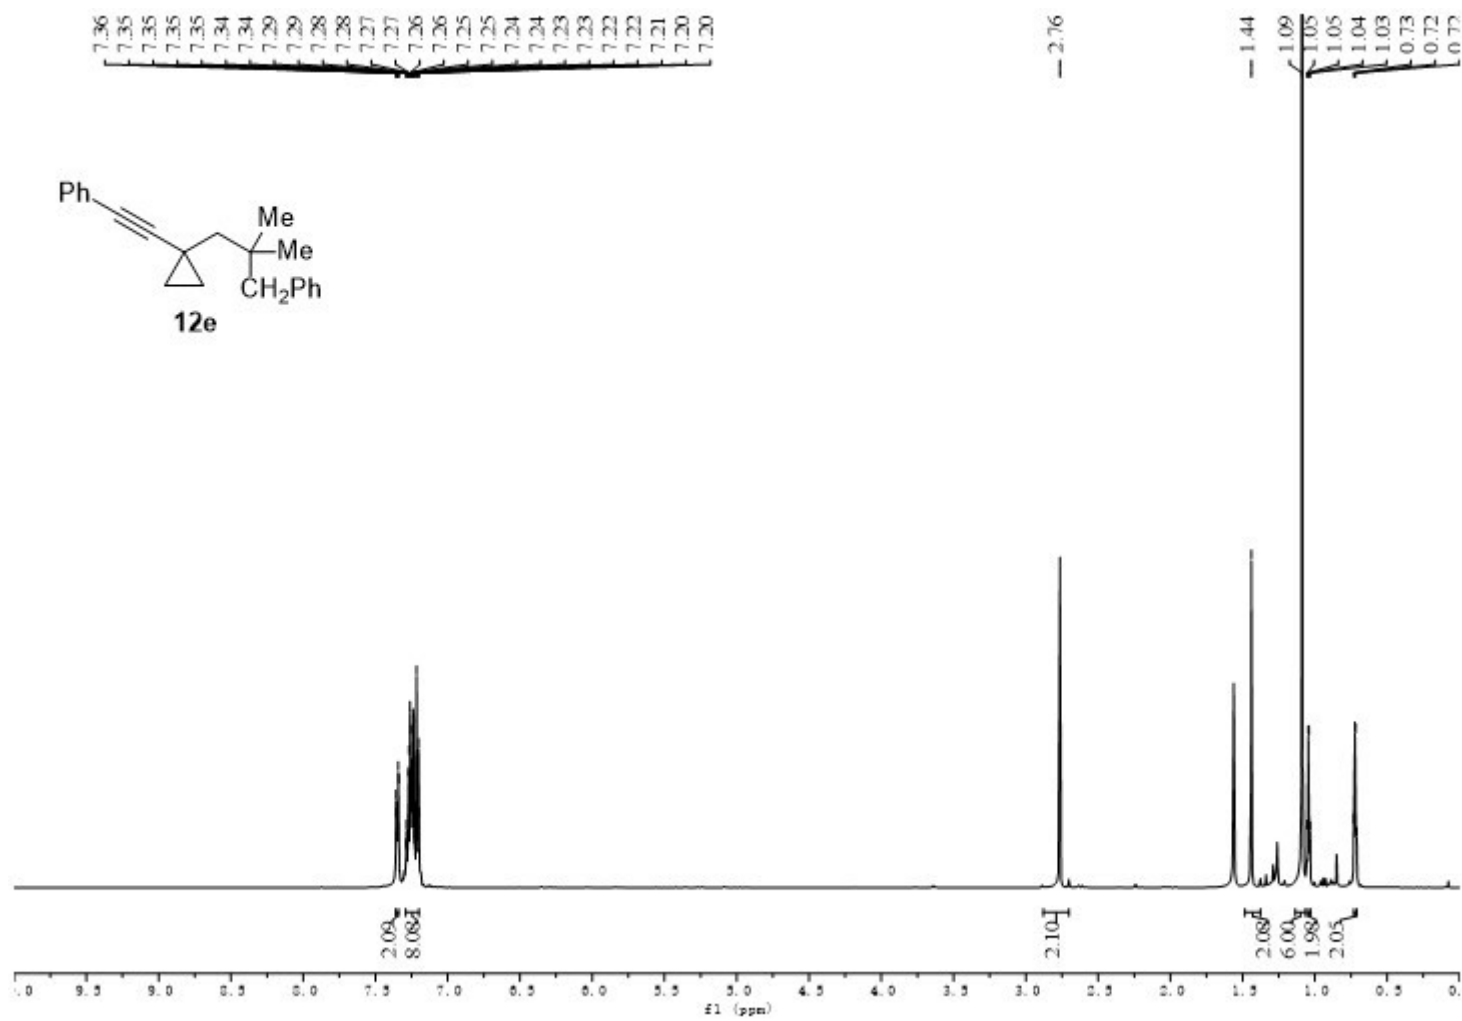

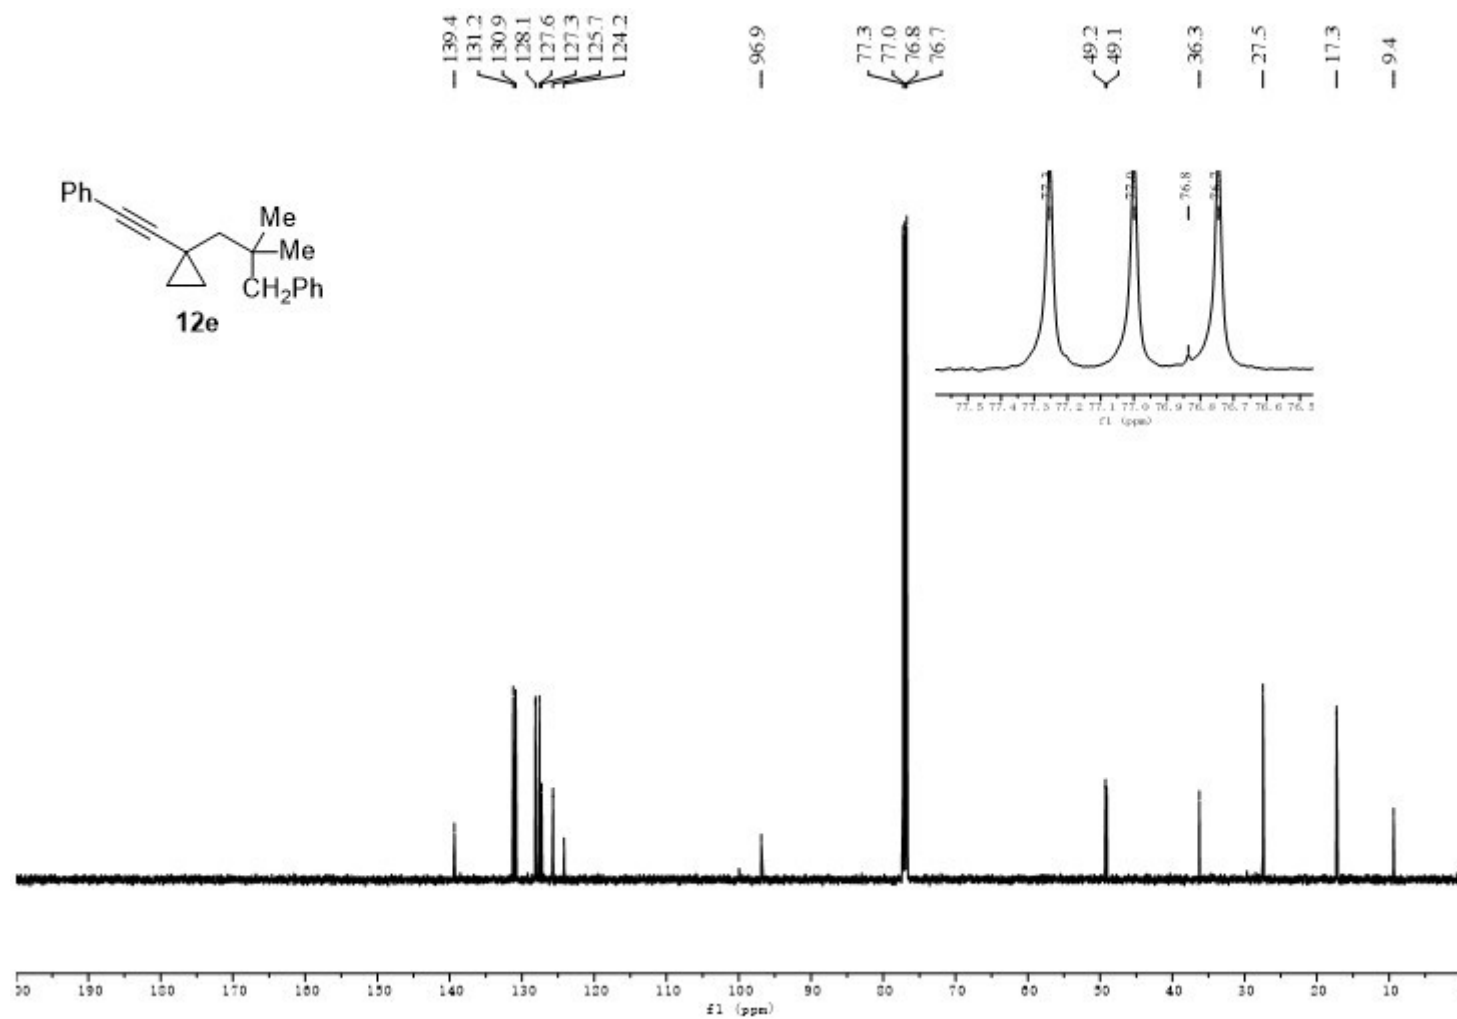

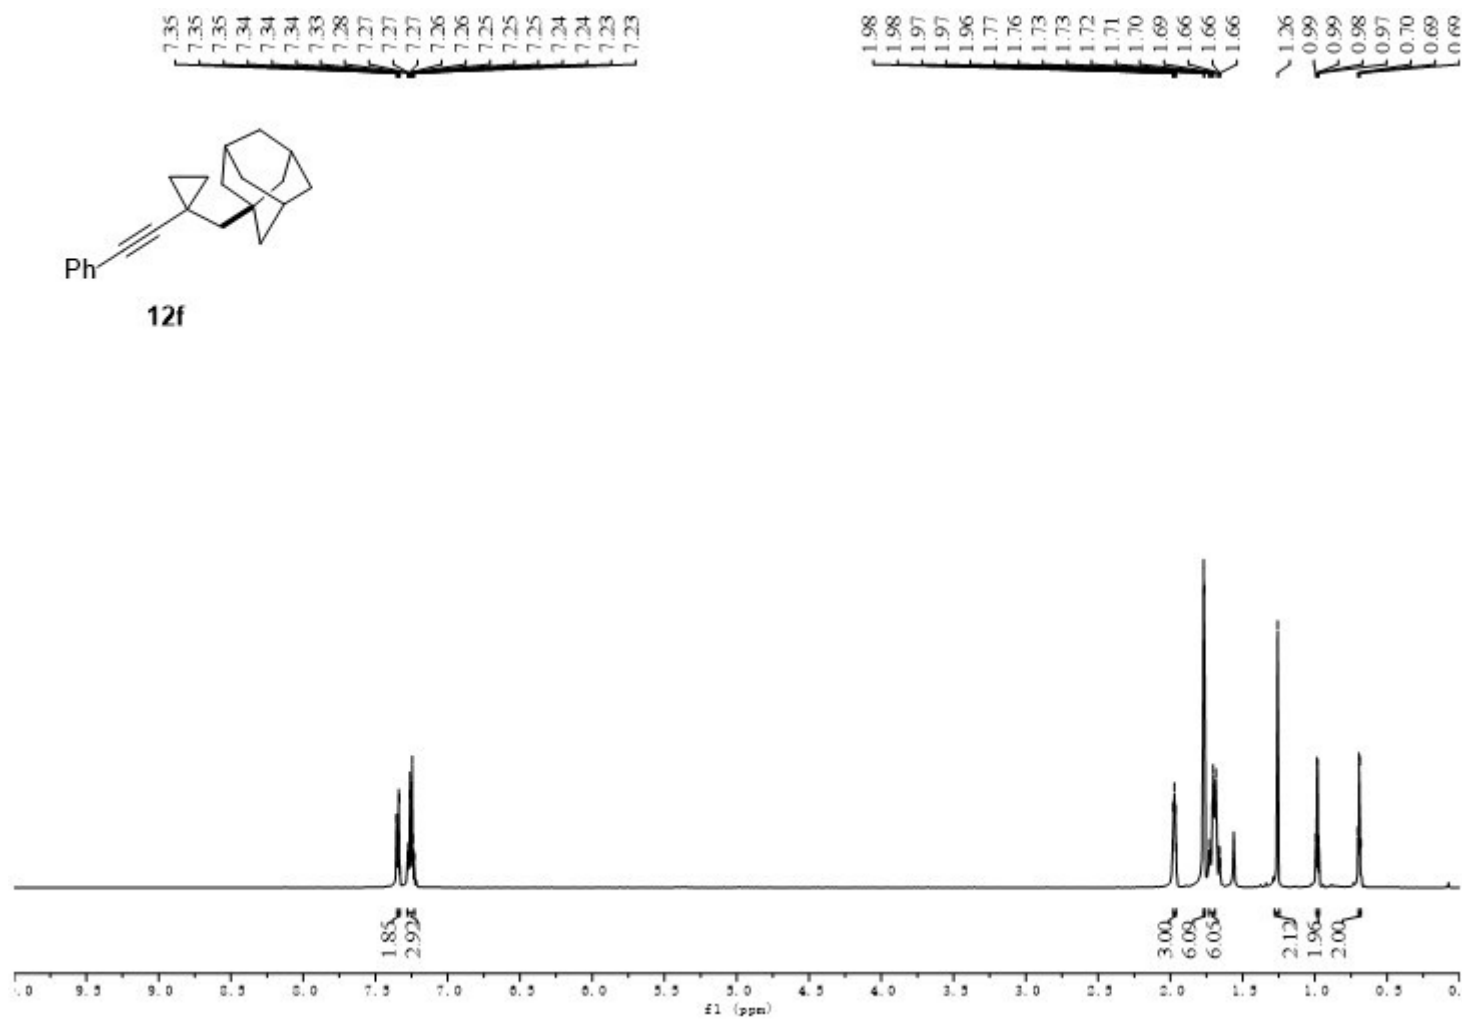

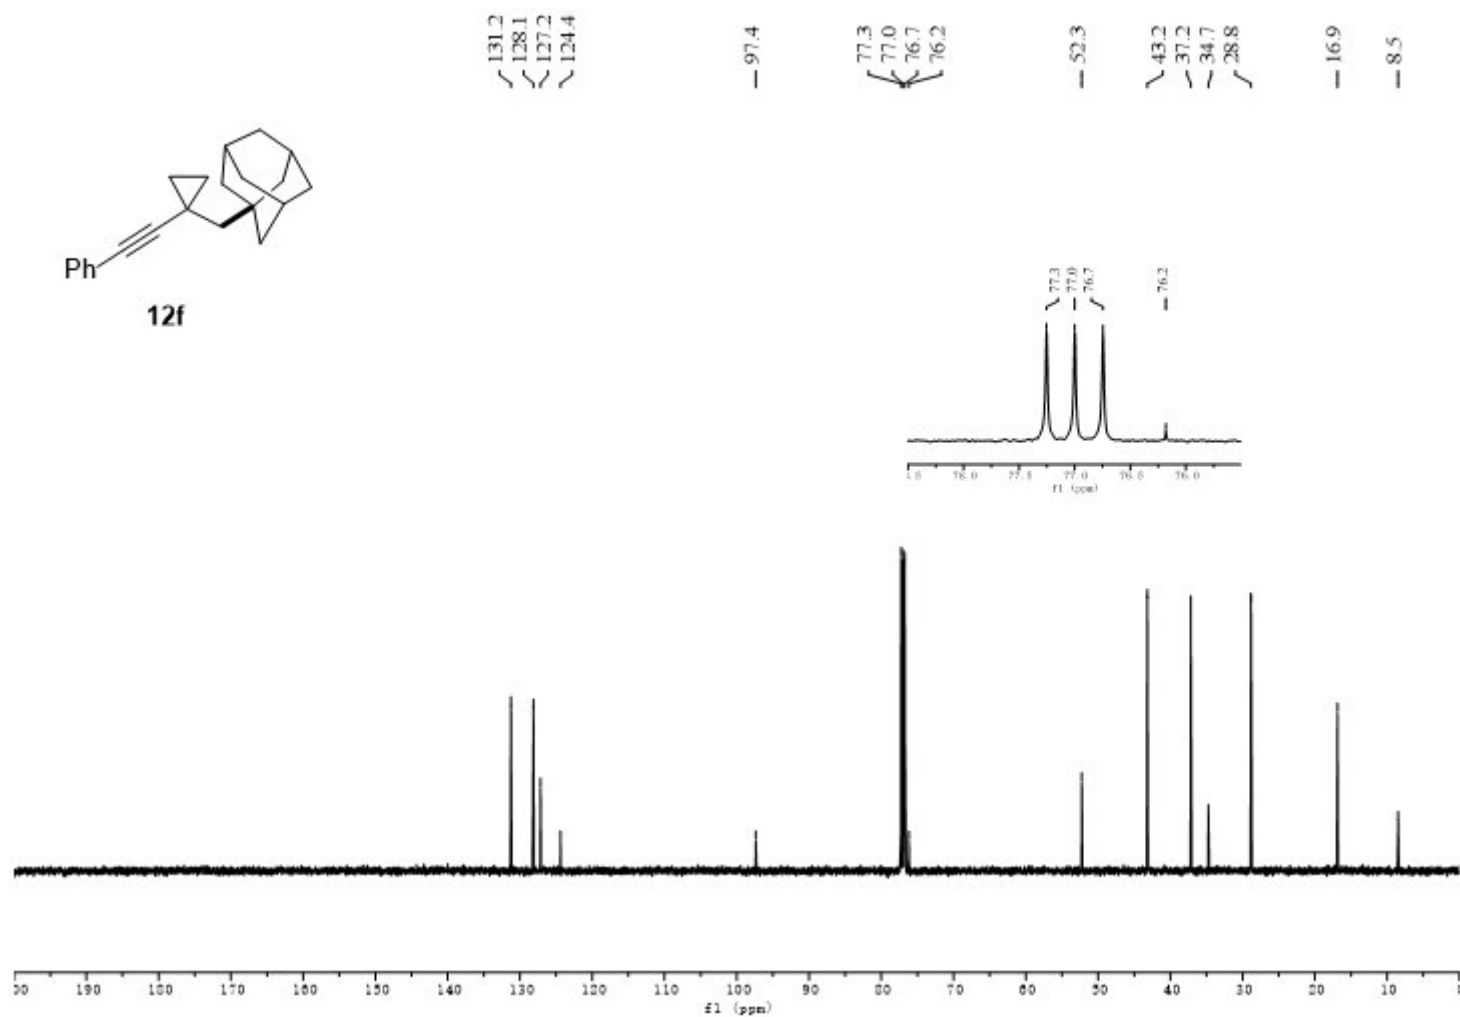

Supplement: d2ob02155b1.pdf [file d2ob02155b1.pdf]
